# Supplementary material for: Ambulatory sleep scoring using accelerometers—distinguishing between nonwear and sleep/wake states
Source: PeerJ. 2020 Jan 2;8:e8284. doi: 10.7717/peerj.8284 (PMC6942683; doi:10.7717/peerj.8284)
Supplement: Dataset S3 — 0: wake, 1: sleep, 2: non-wear. [file peerj-08-8284-s003.csv]

SC001	SC001	SC002	SC003	SC006	SC007	SC008	SC009	SC011	SC012	SC013	SC015	SC016	SC018	SC019	SC020	SC022	SC023	SC026	SC027	SC028	SC029	SC030	SC031	SC032	SC033	SC034	SC035	SC036	SC037	SC042	SC043	SC044	SC045	SC046	SC048	SC049	SC050	SC051	SC052	SC053	SC054	SC055	SC056	SC058	SC059	SC061	SC063	SC064	SC065
0	0	0	0	0	0	0	0	0	2	0	0	0	0	0	0	0	0	0	0	0	2	0	0	0	0	0	0	0	0	0	0	2	0	0	0	0	0	0	0	0	0	0	0	0	0	0	0	0	0
0	0	0	0	0	0	0	0	0	2	0	0	0	0	0	0	0	0	0	0	0	2	0	0	0	0	0	0	0	0	0	0	2	0	0	0	0	0	0	0	0	0	0	0	0	0	0	0	0	0
0	0	0	0	0	0	0	0	0	2	0	0	0	0	0	0	0	0	0	0	0	2	0	0	0	0	0	0	0	0	0	0	2	0	0	0	0	0	0	0	0	0	0	0	0	0	0	0	0	0
0	0	0	0	0	0	0	0	0	2	0	0	0	0	0	0	0	0	0	0	0	2	0	0	0	0	0	0	0	0	0	0	2	0	0	0	0	0	0	0	0	0	0	0	0	0	0	0	0	0
0	0	0	0	0	0	0	0	0	2	0	0	0	0	0	0	0	0	0	0	0	2	0	0	0	0	0	0	0	0	0	0	2	0	0	0	0	0	0	0	0	0	0	0	0	0	0	0	0	0
0	0	0	0	0	0	0	0	0	2	0	0	0	0	0	0	0	0	0	0	0	2	0	0	0	0	0	0	0	0	0	0	2	0	0	0	0	0	0	0	0	0	0	0	0	0	0	0	0	0
0	0	0	0	0	0	0	0	0	2	0	0	0	0	0	0	0	0	0	0	0	2	0	0	0	0	0	0	0	0	0	0	2	0	0	0	0	0	0	0	0	0	0	0	0	0	0	0	0	0
0	0	0	0	0	0	0	0	0	2	0	0	0	0	0	0	0	0	0	0	0	2	0	0	0	0	0	0	0	0	0	0	2	0	0	0	0	0	0	0	0	0	0	0	0	0	0	0	0	0
0	0	0	0	0	0	0	0	0	2	0	0	0	0	0	0	0	0	0	0	0	2	0	0	0	0	0	0	0	0	0	0	2	0	0	0	0	0	0	0	0	0	0	0	0	0	0	0	0	0
0	0	0	0	0	0	0	0	0	2	0	0	0	0	0	0	0	0	0	0	0	2	0	0	0	0	0	0	0	0	0	0	2	0	0	0	0	0	0	0	0	0	0	0	0	0	0	0	0	0
0	0	0	0	0	0	0	0	0	2	0	0	0	0	0	0	0	0	0	0	0	2	0	0	0	0	0	0	0	0	0	0	2	0	0	0	0	0	0	0	0	0	0	0	0	0	0	0	0	0
0	0	0	0	0	0	0	0	0	2	0	0	0	0	0	0	0	0	0	0	0	2	0	0	0	0	0	0	0	0	0	0	2	0	0	0	0	0	0	0	0	0	0	0	0	0	0	0	0	0
0	0	0	0	0	0	0	0	0	2	0	0	0	0	0	0	0	0	0	0	0	2	0	0	0	0	0	0	0	0	0	0	2	0	0	0	0	0	0	0	0	0	0	0	0	0	0	0	0	0
0	0	0	0	0	0	0	0	0	2	0	0	0	0	0	0	0	0	0	0	0	2	0	0	0	0	0	0	0	0	0	0	2	0	0	0	0	0	0	0	0	0	0	0	0	0	0	0	0	0
0	0	0	0	0	0	0	0	0	2	0	0	0	0	0	0	0	0	0	0	0	2	0	0	0	0	0	0	0	0	0	0	2	0	0	0	0	0	0	0	0	0	0	0	0	0	0	0	0	0
0	0	0	0	0	0	0	0	0	2	0	0	0	0	0	0	0	0	0	0	0	2	0	0	0	0	0	0	0	0	0	0	2	0	0	0	0	0	0	0	0	0	0	0	0	0	0	0	0	0
0	0	0	0	0	0	0	0	0	2	0	0	0	0	0	0	0	0	0	0	0	2	0	0	0	0	0	0	0	0	0	0	2	0	0	0	0	0	0	0	0	0	0	0	0	0	0	0	0	0
0	0	0	0	0	0	0	0	0	2	0	0	0	0	0	0	0	0	0	0	0	2	0	0	0	0	0	0	0	0	0	0	0	0	0	0	0	0	0	0	0	0	0	0	0	0	0	0	0	0
0	0	0	0	0	0	0	0	0	2	0	0	0	0	0	0	0	0	0	0	0	2	0	0	0	0	0	0	0	0	0	0	0	0	0	0	0	0	0	0	0	0	0	0	0	0	0	0	0	0
0	0	0	0	0	0	0	0	0	2	0	0	0	0	0	0	0	0	0	0	0	2	0	0	0	0	0	0	0	0	0	0	0	0	0	0	0	0	0	0	0	0	0	0	0	0	0	0	0	0
0	0	0	0	0	0	0	0	0	2	0	0	0	0	0	0	0	0	0	0	0	2	0	0	0	0	0	0	0	0	0	0	0	0	0	0	0	0	0	0	0	0	0	0	0	0	0	0	0	0
0	0	0	0	0	0	0	0	0	2	0	0	0	0	0	0	0	0	0	0	0	2	0	0	0	0	0	0	0	0	0	0	0	0	0	0	0	0	0	0	0	0	0	0	0	0	0	0	0	0
0	0	0	0	0	0	0	0	0	2	0	0	0	0	0	0	0	0	0	0	0	2	0	0	0	0	0	0	0	0	0	0	0	0	0	0	0	0	0	0	0	0	0	0	0	0	0	0	0	0
0	0	0	0	0	0	0	0	0	2	0	0	0	0	0	0	0	0	0	0	0	2	0	0	0	0	0	0	0	0	0	0	0	0	0	0	0	0	0	0	0	0	0	0	0	0	0	0	0	0
0	0	0	0	0	0	0	0	0	2	0	0	0	0	0	0	0	0	0	0	0	2	0	0	0	0	0	0	0	0	0	0	0	0	0	0	0	0	0	0	0	0	0	0	0	0	0	0	0	0
0	0	0	0	0	0	0	0	0	2	0	0	0	0	0	0	0	0	0	0	0	2	0	0	0	0	0	0	0	0	0	0	0	0	0	0	0	0	0	0	0	0	0	0	0	0	0	0	0	0
0	0	0	0	0	0	0	0	0	2	0	0	0	0	0	0	0	0	0	0	0	2	0	0	0	0	0	0	0	0	0	0	0	0	0	0	0	0	0	0	0	0	0	0	0	0	0	0	0	0
0	0	0	0	0	0	0	0	0	2	0	0	0	0	0	0	0	0	0	0	0	2	0	0	0	0	0	0	0	0	0	0	0	0	0	0	0	0	0	0	0	0	0	0	0	0	0	0	0	0
0	0	0	0	0	0	0	0	0	2	0	0	0	0	0	0	0	0	0	0	0	2	0	0	0	0	0	0	0	0	0	0	0	0	0	0	0	0	0	0	0	0	0	0	0	0	0	0	0	0
0	0	0	0	0	0	0	0	0	2	0	0	0	0	0	0	0	0	0	0	0	2	0	0	0	0	0	0	0	0	0	0	0	0	0	0	0	0	0	0	0	0	0	0	0	0	0	0	0	0
0	0	0	0	0	0	0	0	0	2	0	0	0	0	0	0	0	0	0	0	0	2	0	0	0	0	0	0	0	0	0	0	0	0	0	0	0	0	0	0	0	0	0	0	0	0	0	0	0	0
0	0	0	0	0	0	0	0	0	2	0	0	0	0	0	0	0	0	0	0	0	2	0	0	0	0	0	0	0	0	0	0	0	0	0	0	0	0	0	0	0	0	0	0	0	0	0	0	0	0
0	0	0	0	0	0	0	0	0	2	0	0	0	0	0	0	0	0	0	0	0	2	0	0	0	0	0	0	0	0	0	0	0	0	0	0	0	0	0	0	0	0	0	0	0	0	0	0	0	0
0	0	0	0	0	0	0	0	0	2	0	0	0	0	0	0	0	0	0	0	0	2	0	0	0	0	0	0	0	0	0	0	0	0	0	0	0	0	0	0	0	0	0	0	0	0	0	0	0	0
0	0	0	0	0	0	0	0	0	2	0	0	0	0	0	0	0	0	0	0	0	2	0	0	0	0	0	0	0	0	0	0	0	0	0	0	0	0	0	0	0	0	0	0	0	0	0	0	0	0
0	0	0	0	0	0	0	0	0	2	0	0	0	0	0	0	0	0	0	0	0	2	0	0	0	0	0	0	0	0	0	0	0	0	0	0	0	0	0	0	0	0	0	0	0	0	0	0	0	0
0	0	0	0	0	0	0	0	0	2	0	0	0	0	0	0	0	0	0	0	0	2	0	0	0	0	0	0	0	0	0	0	0	0	0	0	0	0	0	0	0	0	0	0	0	0	0	0	0	0
0	0	0	0	0	0	0	0	0	2	0	0	0	0	0	0	0	0	0	0	0	2	0	0	0	0	0	0	0	0	0	0	0	0	0	0	0	0	0	0	0	0	0	0	0	0	0	0	0	0
0	0	0	0	0	0	0	0	0	2	0	0	0	0	0	0	0	0	0	0	0	2	0	0	0	0	0	0	0	0	0	0	0	0	0	0	0	0	0	0	0	0	0	0	0	0	0	0	0	0
0	0	0	0	0	0	0	0	0	2	0	0	0	0	0	0	0	0	0	0	0	2	0	0	0	0	0	0	0	0	0	0	0	0	0	0	0	0	0	0	0	0	0	0	0	0	0	0	0	0
0	0	0	0	0	0	0	0	0	2	0	0	0	0	0	0	0	0	0	0	0	2	0	0	0	0	0	0	0	0	0	0	0	0	0	0	0	0	0	0	0	0	0	0	0	0	0	0	0	0
0	0	0	0	0	0	0	0	0	0	0	0	0	0	0	0	0	0	0	0	0	2	0	0	0	0	0	0	0	0	0	0	0	0	0	0	0	0	0	0	0	0	0	0	0	0	0	0	0	0
0	0	0	0	0	0	0	0	0	0	0	0	0	0	0	0	0	0	0	0	0	2	0	0	0	0	0	0	0	0	0	0	0	0	0	0	0	0	0	0	0	0	0	0	0	0	0	0	0	0
0	0	0	0	0	0	0	0	0	0	0	0	0	0	0	0	0	0	0	0	0	2	0	0	0	0	0	0	0	0	0	0	0	0	0	0	0	0	0	0	0	0	0	0	0	0	0	0	0	0
0	0	0	0	0	0	0	0	0	0	0	0	0	0	0	0	0	0	0	0	0	2	0	0	0	0	0	0	0	0	0	0	0	0	0	0	0	0	0	0	0	0	0	0	0	0	0	0	0	0
0	0	0	0	0	0	0	0	0	0	0	0	0	0	0	0	0	0	0	0	0	2	0	0	0	0	0	0	0	0	0	0	0	0	0	0	0	0	0	0	0	0	0	0	0	0	0	0	0	0
0	0	0	0	0	0	0	0	0	0	0	0	0	0	0	0	0	0	0	0	0	2	0	0	0	0	0	0	0	0	0	0	0	0	0	0	0	0	0	0	0	0	0	0	0	0	0	0	0	0
0	0	0	0	0	0	0	0	0	0	0	0	0	0	0	0	0	0	0	0	0	2	0	0	0	0	0	0	0	0	0	0	0	0	0	0	0	0	0	0	0	0	0	0	0	0	0	0	0	0
0	0	0	0	0	0	0	0	0	0	0	0	0	0	0	0	0	0	0	0	0	2	0	0	0	0	0	0	0	0	0	0	0	0	0	0	0	0	0	0	0	0	0	0	0	0	0	0	0	0
0	0	0	0	0	0	0	0	0	0	0	0	0	0	0	0	0	0	0	0	0	2	0	0	0	0	0	0	0	0	0	0	0	0	0	0	0	0	0	0	0	0	0	0	0	0	0	0	0	0
0	0	0	0	0	0	0	0	0	0	0	0	0	0	0	0	0	0	0	0	0	2	0	0	0	0	0	0	0	0	0	0	0	0	0	0	0	0	0	0	0	0	0	0	0	0	0	0	0	0
0	0	0	0	0	0	0	0	0	0	0	0	0	0	0	0	0	0	0	0	0	2	0	0	0	0	0	0	0	0	0	0	0	0	0	0	0	0	0	0	0	0	0	0	0	0	0	0	0	0
0	0	0	0	0	0	0	0	0	0	0	0	0	0	0	0	0	0	0	0	0	2	0	0	0	0	0	0	0	0	0	0	0	0	0	0	0	0	0	0	0	0	0	0	0	0	0	0	0	0
0	0	0	0	0	0	0	0	0	0	0	0	0	0	0	0	0	0	0	0	0	2	0	0	0	0	0	0	0	0	0	0	0	0	0	0	0	0	0	0	0	0	0	0	0	0	0	0	0	0
0	0	0	0	0	0	0	0	0	0	0	0	0	0	0	0	0	0	0	0	0	2	0	0	0	0	0	0	0	0	0	0	0	0	0	0	0	0	0	0	0	0	0	0	0	0	0	0	0	0
0	0	0	0	0	0	0	0	0	0	0	0	0	0	0	0	0	0	0	0	0	2	0	0	0	0	0	0	0	0	0	0	0	0	0	0	0	0	0	0	0	0	0	0	0	0	0	0	0	0
0	0	0	0	0	0	0	0	0	0	0	0	0	0	0	0	0	0	0	0	0	2	0	0	0	0	0	0	0	0	0	0	0	0	0	0	0	0	0	0	0	0	0	0	0	0	0	0	0	0
0	0	0	0	0	0	0	0	0	0	0	0	0	0	0	0	0	0	0	0	0	2	0	0	0	0	0	0	0	0	0	0	0	0	0	0	0	0	0	0	0	0	0	0	0	0	0	0	0	0
0	0	0	0	0	0	0	0	0	0	0	0	0	0	0	0	0	0	0	0	0	2	0	0	0	0	0	0	0	0	0	0	0	0	0	0	0	0	0	0	0	0	0	0	0	0	0	0	0	0
0	0	0	0	0	0	0	0	0	0	0	0	0	0	0	0	0	0	0	0	0	2	0	0	0	0	0	0	0	0	0	0	0	0	0	0	0	0	0	0	0	0	0	0	0	0	0	0	0	0
0	0	0	0	0	0	0	0	0	0	0	0	0	0	0	0	0	0	0	0	0	2	0	0	0	0	0	0	0	0	0	0	0	0	0	0	0	0	0	0	0	0	0	0	0	0	0	0	0	0
0	0	0	0	0	0	0	0	0	0	0	0	0	0	0	0	0	0	0	0	0	2	0	0	0	0	0	0	0	0	0	0	0	0	0	0	0	0	0	0	0	0	0	0	0	0	0	0	0	0
0	0	0	0	0	0	0	0	0	0	0	0	0	0	0	0	0	0	0	0	0	2	0	0	0	0	0	0	0	0	0	0	0	0	0	0	0	0	0	0	0	0	0	0	0	0	0	0	0	0
0	0	0	0	0	0	0	0	0	0	0	0	0	0	0	0	0	0	0	0	0	0	0	0	0	0	0	0	0	0	0	0	0	0	0	0	0	0	0	0	0	0	0	0	0	0	0	0	0	0
0	0	0	0	0	0	0	0	0	0	0	0	0	0	0	0	0	0	0	0	0	0	0	0	0	0	0	0	0	0	0	0	0	0	0	0	0	0	0	0	0	0	0	0	0	0	0	0	0	0
0	0	0	0	0	0	0	0	0	0	0	0	0	0	0	0	0	0	0	0	0	0	0	0	0	0	0	0	0	0	0	0	0	0	0	0	0	0	0	0	0	0	0	0	0	0	0	0	0	0
0	0	0	0	0	0	0	0	0	0	0	0	0	0	0	0	0	0	0	0	0	0	0	0	0	0	0	0	0	0	0	0	0	0	0	0	0	0	0	0	0	0	0	0	0	0	0	0	0	0
0	0	0	0	0	0	0	0	0	0	0	0	0	0	0	0	0	0	0	0	0	0	0	0	0	0	0	0	0	0	0	0	0	0	0	0	0	0	0	0	0	0	0	0	0	0	0	0	0	0
0	0	0	0	0	0	0	0	0	0	0	0	0	0	0	0	0	0	0	0	0	0	0	0	0	0	0	0	0	0	0	0	0	0	0	0	0	0	0	0	0	0	0	0	0	0	0	0	0	0
0	0	0	0	0	0	0	0	0	0	0	0	0	0	0	0	0	0	0	0	0	0	0	0	0	0	0	0	0	0	0	0	0	0	0	0	0	0	0	0	0	0	0	0	0	0	0	0	0	0
0	0	0	0	0	0	0	0	0	0	0	0	0	0	0	0	0	0	0	0	0	0	0	0	0	0	0	0	0	0	0	0	0	0	0	0	0	0	0	0	0	0	0	0	0	0	0	0	0	0
0	0	0	0	0	0	0	0	0	0	0	0	0	0	0	0	0	0	0	0	0	0	0	0	0	0	0	0	0	0	0	0	0	0	0	0	0	0	0	0	0	0	0	0	0	0	0	0	0	0
0	0	0	0	0	0	0	0	0	0	0	0	0	0	0	0	0	0	0	0	0	0	0	0	0	0	0	0	0	0	0	0	0	0	0	0	0	0	0	0	0	0	0	0	0	0	0	0	0	0
0	0	0	0	0	0	0	0	0	0	0	0	0	0	0	0	0	0	0	0	0	0	0	0	0	0	0	0	0	0	0	0	0	0	0	0	0	0	0	0	0	0	0	0	0	0	0	0	0	0
0	0	0	0	0	0	0	0	0	0	1	0	0	0	0	0	0	0	0	0	0	0	0	0	0	0	0	0	0	0	0	0	0	0	0	0	0	0	0	0	0	0	0	0	0	0	0	0	0	0
0	0	0	0	0	0	0	0	0	0	1	0	0	0	0	0	0	0	0	0	0	0	0	0	0	0	0	0	0	0	0	0	0	0	0	0	0	0	0	0	0	0	0	0	0	0	0	0	0	0
0	0	0	0	0	0	0	0	0	0	1	0	0	0	0	0	0	0	0	0	0	0	0	0	0	0	0	0	0	0	0	0	0	0	0	0	0	0	0	0	0	0	0	0	0	0	0	0	0	0
0	0	0	0	0	0	0	0	0	0	1	0	0	0	0	0	0	0	0	0	0	0	0	0	0	0	0	0	0	0	0	0	0	0	0	0	0	0	0	0	0	0	0	0	0	0	0	0	0	0
0	0	0	0	0	0	0	0	0	0	1	0	0	0	0	0	0	0	0	0	0	0	0	0	0	0	0	0	0	0	0	0	0	0	0	0	0	0	0	0	0	0	0	0	0	0	0	0	0	0
0	0	0	0	0	0	0	0	0	0	1	0	0	0	0	0	0	0	0	0	0	0	0	0	0	0	0	0	0	0	0	0	0	0	0	0	0	0	0	0	0	0	0	0	0	0	0	0	0	0
0	0	0	0	0	0	0	0	0	0	1	0	0	0	0	0	0	0	0	0	0	0	0	0	0	0	0	0	0	0	0	0	0	0	0	0	0	0	0	0	0	0	0	0	0	0	0	0	0	0
0	0	0	0	0	0	0	0	0	0	1	0	0	0	0	0	0	0	0	0	0	0	0	0	0	0	0	0	0	0	0	0	0	0	0	0	0	0	0	0	0	0	0	0	0	0	0	0	0	0
0	0	0	0	0	0	0	0	0	0	1	0	0	0	0	0	0	0	0	0	0	0	0	0	0	0	0	0	0	0	0	0	0	0	0	0	0	0	0	0	0	0	0	0	0	0	0	0	0	0
0	0	0	0	0	0	0	0	0	0	1	0	0	0	0	0	0	0	0	0	0	0	0	0	0	0	0	0	0	0	0	0	0	0	0	0	0	0	0	0	0	0	0	0	0	0	0	0	0	0
0	0	0	0	0	0	0	0	0	0	1	0	0	0	0	0	0	0	0	0	0	0	0	0	0	0	0	0	0	0	0	0	0	0	0	0	0	0	0	0	0	0	0	0	0	0	0	0	0	0
0	0	0	0	0	0	0	0	0	0	1	0	0	0	0	0	0	0	0	0	0	0	0	0	0	0	0	0	0	0	0	0	0	0	0	0	0	0	0	0	0	0	0	0	0	0	0	0	0	0
0	0	0	0	0	0	0	0	0	0	1	0	0	0	0	0	0	0	0	0	0	0	0	0	0	0	0	0	0	0	0	0	0	0	0	0	0	0	0	0	0	0	0	0	0	0	0	0	0	0
0	0	0	0	0	0	0	0	0	0	1	0	0	0	0	0	0	0	0	0	0	0	0	0	0	0	0	0	0	0	0	0	0	0	0	0	0	0	0	0	0	0	0	0	0	0	0	0	0	0
0	0	0	0	0	0	0	0	0	0	1	0	0	0	0	0	0	0	0	0	0	0	0	0	0	0	0	0	0	0	0	0	0	0	0	0	0	0	0	0	0	0	0	0	0	0	0	0	0	0
0	0	0	0	0	0	0	0	0	0	1	0	0	0	0	0	0	0	0	0	0	0	0	0	0	0	0	0	0	0	0	0	0	0	0	0	0	0	0	0	0	0	0	0	0	0	0	0	0	0
0	0	0	0	0	0	0	0	0	0	1	0	0	0	0	0	0	0	0	0	0	0	0	0	0	0	0	0	0	0	0	0	0	0	0	0	0	0	0	0	0	0	0	0	0	0	0	0	0	0
0	0	0	0	0	0	0	0	0	0	1	0	0	0	0	0	0	0	0	0	0	0	0	0	0	0	0	0	0	0	0	0	0	0	0	0	0	0	0	0	0	0	0	0	0	0	0	0	0	0
0	0	0	0	0	0	0	0	0	0	1	0	0	0	0	0	0	0	0	0	0	0	0	0	0	0	0	0	0	0	0	0	0	0	0	0	0	0	0	0	0	0	0	0	0	0	0	0	0	0
0	0	0	0	0	0	0	0	0	0	1	0	0	0	0	0	0	0	0	0	0	0	0	0	0	0	0	0	0	0	0	0	0	0	0	0	0	0	0	0	0	0	0	0	0	0	0	0	0	0
0	0	0	0	0	0	0	0	0	0	1	0	0	0	0	0	0	0	0	0	0	0	0	0	0	0	0	0	0	0	0	0	0	0	0	0	0	0	0	0	0	0	0	0	0	0	0	0	0	0
0	0	0	0	0	0	0	0	0	0	1	0	0	0	0	0	0	0	0	0	0	0	0	0	0	0	0	0	0	0	0	0	0	0	0	0	0	0	0	0	0	0	0	0	0	0	0	0	0	0
0	0	0	0	0	0	0	0	0	0	1	0	0	0	0	0	0	0	0	0	0	0	0	0	0	0	0	0	0	0	0	0	0	0	0	0	0	0	0	0	0	0	0	0	0	0	0	0	0	0
0	0	0	0	0	0	0	0	0	0	1	0	0	0	0	0	0	0	0	0	0	0	0	0	0	0	0	0	0	0	0	0	0	0	0	0	0	0	0	0	0	0	0	0	0	0	0	0	0	0
0	0	0	0	0	0	0	0	0	0	0	0	0	0	0	0	0	0	0	0	0	0	0	0	0	0	0	0	0	0	0	0	0	0	0	0	0	0	0	0	0	0	0	0	0	0	0	0	0	0
0	0	0	0	0	0	0	0	0	0	1	0	0	0	0	0	0	0	0	0	0	0	0	0	0	0	0	0	0	0	0	0	0	0	0	0	0	0	0	0	0	0	0	0	0	0	0	0	0	0
0	0	0	0	0	0	0	0	0	0	1	0	0	0	0	0	0	0	0	0	0	0	0	0	0	0	0	0	0	0	0	0	0	0	0	0	0	0	0	0	0	0	0	0	0	0	0	0	0	0
0	0	0	0	0	0	0	0	0	0	1	0	0	0	0	0	0	0	0	0	0	0	0	0	0	0	0	0	0	0	0	0	0	0	0	0	0	0	0	0	0	0	0	0	0	0	0	0	0	0
0	0	0	0	0	0	0	0	0	0	1	0	0	0	0	0	0	0	0	0	0	0	0	0	0	0	0	0	0	0	0	0	0	0	0	0	0	0	0	0	0	0	0	0	0	0	0	0	0	0
0	0	0	0	0	0	0	0	0	0	1	0	0	0	0	0	0	0	0	0	0	0	0	0	0	0	0	0	0	0	0	0	0	0	0	0	0	0	0	0	0	0	0	0	0	0	0	0	0	0
0	0	0	0	0	0	0	0	0	0	1	0	0	0	0	0	0	0	0	0	0	0	0	0	0	0	0	0	0	0	0	0	0	0	0	0	0	0	0	0	0	0	0	0	0	0	0	0	0	0
0	0	0	0	0	0	0	0	0	0	1	0	0	0	0	0	0	0	0	0	0	0	0	0	0	0	0	0	0	0	0	0	0	0	0	0	0	0	0	0	0	0	0	0	0	0	0	0	0	0
0	0	0	0	0	0	0	0	0	0	1	0	0	0	0	0	0	0	0	0	0	0	0	0	0	0	0	0	0	0	0	0	0	0	0	0	0	0	0	0	0	0	0	0	0	0	0	0	0	0
0	0	0	0	0	0	0	0	0	0	1	0	0	0	0	0	0	0	0	0	0	0	0	0	0	0	0	0	0	0	0	0	0	0	0	0	0	0	0	0	0	0	0	0	0	0	0	0	0	0
0	0	0	0	0	0	0	0	0	0	1	0	0	0	0	0	0	0	0	0	0	0	0	0	0	0	0	0	0	0	0	0	0	0	0	0	0	0	0	0	0	0	0	0	0	0	0	0	0	0
0	0	0	0	0	0	0	0	0	0	1	0	0	0	0	0	0	0	0	0	0	0	0	0	0	0	0	0	0	0	0	0	0	0	0	0	0	0	0	0	0	0	0	0	0	0	0	0	0	0
0	0	0	0	0	0	0	0	0	0	1	0	0	0	0	0	0	0	0	0	0	0	0	0	0	0	0	0	0	0	0	0	0	0	0	0	0	0	0	0	0	0	0	0	0	0	0	0	0	0
0	0	0	0	0	0	0	0	0	0	1	0	0	0	0	0	0	0	0	0	0	0	0	0	0	0	0	0	0	0	0	0	0	0	0	0	0	0	0	0	0	0	0	0	0	0	0	0	0	0
0	0	0	0	0	0	0	0	0	0	1	0	0	0	0	0	0	0	0	0	0	0	0	0	0	0	0	0	0	0	0	0	0	0	0	0	0	0	0	0	0	0	0	0	0	0	0	0	0	0
0	0	0	0	0	0	0	0	0	0	1	0	0	0	0	0	0	0	0	0	0	0	0	0	0	0	0	0	0	0	0	0	0	0	0	0	0	0	0	0	0	0	0	0	0	0	0	0	0	0
0	0	0	0	0	0	0	0	0	0	1	0	0	0	0	0	0	0	0	0	0	0	0	0	0	0	0	0	0	0	0	0	0	0	0	0	0	0	0	0	0	0	0	0	0	0	0	0	0	0
0	0	0	0	0	0	0	0	0	0	1	0	0	0	0	0	0	0	0	0	0	0	0	0	0	0	0	0	0	0	0	0	0	0	0	0	0	0	0	0	0	0	0	0	0	0	0	0	0	0
0	0	0	0	0	0	0	0	0	0	1	0	0	0	0	0	0	0	0	0	0	0	0	0	0	0	0	0	0	0	0	0	0	0	0	0	0	0	0	0	0	0	0	0	0	0	0	0	0	0
0	0	0	0	0	0	0	0	0	0	1	0	0	0	0	0	0	0	0	0	0	0	0	0	0	0	0	0	0	0	0	0	0	0	0	0	0	0	0	0	0	0	0	0	0	0	0	0	0	0
0	0	0	0	0	0	0	0	0	0	1	0	0	0	0	0	0	0	0	0	0	0	0	0	0	0	0	0	0	0	0	0	0	0	0	0	0	0	0	0	0	0	0	0	0	0	0	0	0	0
0	0	0	0	0	0	0	0	0	0	1	0	0	0	0	0	0	0	0	0	0	0	0	0	0	0	0	0	0	0	0	0	0	0	0	0	0	0	0	0	0	0	0	0	0	0	0	0	0	0
0	0	0	0	0	0	0	0	0	0	1	0	0	0	0	0	0	0	0	0	0	0	0	0	0	0	0	0	0	0	0	0	0	0	0	0	0	0	0	0	0	0	0	0	0	0	0	0	0	0
0	0	0	0	0	0	0	0	0	0	1	0	0	0	0	0	0	0	0	0	0	0	0	0	0	0	0	0	0	0	0	0	0	0	0	0	0	0	0	0	0	0	0	0	0	0	0	0	0	0
0	0	0	0	0	0	0	0	0	0	1	0	0	0	0	0	0	0	0	0	0	0	0	0	0	0	0	0	0	0	0	0	0	0	0	0	0	0	0	0	0	0	0	0	0	0	0	0	0	0
0	0	0	0	0	0	0	0	0	0	1	0	0	0	0	0	0	0	0	0	0	0	0	0	0	0	0	0	0	0	0	0	0	0	0	0	0	0	0	0	0	0	0	0	0	0	0	0	0	0
0	0	0	0	0	0	0	0	0	0	1	0	0	0	0	0	0	0	0	0	0	0	0	0	0	0	0	0	0	0	0	0	0	0	0	0	0	0	0	0	0	0	0	0	0	0	0	0	0	0
0	0	0	0	0	0	0	0	0	0	0	0	0	0	0	0	0	0	0	0	0	0	0	0	0	0	0	0	0	0	0	0	0	0	0	0	0	0	0	0	0	0	0	0	0	0	0	0	0	0
0	0	0	0	0	0	0	0	0	0	0	0	0	0	0	0	0	0	0	0	0	0	0	0	0	0	0	0	0	0	0	0	0	0	0	0	0	0	0	0	0	0	0	0	0	0	0	0	0	0
0	0	0	0	0	0	0	0	0	0	0	0	0	0	0	0	0	0	0	0	0	0	0	0	0	0	0	0	0	0	0	0	0	0	0	0	0	0	0	0	0	0	0	0	0	0	0	0	0	0
0	0	0	0	0	0	0	0	0	0	0	0	0	0	0	0	0	0	0	0	0	0	0	0	0	0	0	0	0	0	0	0	0	0	0	0	0	0	0	0	0	0	0	0	0	0	0	0	0	0
0	0	0	0	0	0	0	0	0	0	0	0	0	0	0	0	0	0	0	0	0	0	0	0	0	0	0	0	0	0	0	0	0	0	0	0	0	0	0	0	0	0	0	0	0	0	0	0	0	0
0	0	0	0	0	0	0	0	0	0	0	0	0	0	0	0	0	0	0	0	0	0	0	0	0	0	0	0	0	0	0	0	0	0	0	0	0	0	0	0	0	0	0	0	0	0	0	0	0	0
0	0	0	0	0	0	0	0	0	0	0	0	0	0	0	0	0	0	0	0	0	0	0	0	0	0	0	0	0	0	0	0	0	0	0	0	0	0	0	0	0	0	0	0	0	0	0	0	0	0
0	0	0	0	0	0	0	0	0	0	0	0	0	0	0	0	0	0	0	0	0	0	0	0	0	0	0	0	0	0	0	0	0	0	0	0	0	0	0	0	0	0	0	0	0	0	0	0	0	0
0	0	0	0	0	0	0	0	0	0	0	0	0	0	0	0	0	0	0	0	0	0	0	0	0	0	0	0	0	0	0	0	0	0	0	0	0	0	0	0	0	0	0	0	0	0	0	0	0	0
0	0	0	0	0	0	0	0	0	0	0	0	0	0	0	0	0	0	0	0	0	0	0	0	0	0	0	0	0	0	0	0	0	0	0	0	0	0	0	0	0	0	0	0	0	0	0	0	0	0
0	0	0	0	0	0	0	0	0	0	0	0	0	0	0	0	0	0	0	0	0	0	0	0	0	0	0	0	0	0	0	0	0	0	0	0	0	0	0	0	0	0	0	0	0	0	0	0	0	0
0	0	0	0	0	0	0	0	0	0	0	0	0	0	0	0	0	0	0	0	0	0	0	0	0	0	0	0	0	0	0	0	0	0	0	0	0	0	0	0	0	0	0	0	0	0	0	0	0	0
0	0	0	0	0	0	0	0	0	0	0	0	0	0	0	0	0	0	0	0	0	0	0	0	0	0	0	0	0	0	0	0	0	0	0	0	0	0	0	0	0	0	0	0	0	0	0	0	0	0
0	0	0	0	0	0	0	0	0	0	0	0	0	0	0	0	0	0	0	0	0	0	0	0	0	0	0	0	0	0	0	0	0	0	0	0	0	0	0	0	0	0	0	0	0	0	0	0	0	0
0	0	0	0	0	0	0	0	0	0	0	0	0	0	0	0	0	0	0	0	0	0	0	0	0	0	0	0	0	0	0	0	0	0	0	0	0	0	0	0	0	0	0	0	0	0	0	0	0	0
0	0	0	0	0	0	0	0	0	0	0	0	0	0	0	0	0	0	0	0	0	0	0	0	0	0	0	0	0	0	0	0	0	0	0	0	0	0	0	0	0	0	0	0	0	0	0	0	0	0
0	0	0	0	0	0	0	0	0	0	0	0	0	0	0	0	0	0	0	0	0	0	0	0	0	0	0	0	0	0	0	0	0	0	0	0	0	0	0	0	0	0	0	0	0	0	0	0	0	0
0	0	0	0	0	0	0	0	0	0	0	0	0	0	0	0	0	0	0	0	1	0	0	0	0	0	0	0	0	0	0	0	0	0	0	0	0	0	0	0	0	0	0	0	0	0	0	0	0	0
0	0	0	0	0	0	0	0	0	0	0	0	0	0	0	0	0	0	0	0	1	0	0	0	0	0	0	0	0	0	0	0	0	0	0	0	0	0	0	0	0	0	0	0	0	0	0	0	0	0
0	0	0	0	0	0	0	0	0	0	0	0	0	0	0	0	0	0	0	0	1	0	0	0	0	0	0	0	0	0	0	0	0	0	0	0	0	0	0	0	0	0	0	0	0	0	0	0	0	0
0	0	0	0	0	0	0	0	0	0	0	0	0	0	0	0	0	0	0	0	1	0	0	0	0	0	0	0	0	0	0	0	0	0	0	0	0	0	0	0	0	0	0	0	0	0	0	0	0	0
0	0	0	0	0	0	0	0	0	0	0	0	0	0	0	0	0	0	0	0	1	0	0	0	0	0	0	0	0	0	0	0	0	0	0	0	0	0	0	0	0	0	0	0	0	0	0	0	0	0
0	0	0	0	0	0	0	0	0	0	0	0	0	0	0	0	0	0	0	0	1	0	0	0	0	0	0	0	0	0	0	0	0	0	0	0	0	0	0	0	0	0	0	0	0	0	0	0	0	0
0	0	0	0	0	0	0	0	0	0	0	0	0	0	0	0	0	0	0	0	1	0	0	0	0	0	0	0	0	0	0	0	0	0	0	0	0	0	0	0	0	0	0	0	0	0	0	0	0	0
0	0	0	0	0	0	0	0	0	0	0	0	0	0	0	0	0	0	0	0	1	0	0	0	0	0	0	0	0	0	0	0	0	0	0	0	0	0	0	0	0	0	0	0	0	0	0	0	0	0
0	0	0	0	0	0	0	0	0	0	0	0	0	0	0	0	0	0	0	0	1	0	0	0	0	0	0	0	0	0	0	0	0	0	0	0	0	0	0	0	0	0	0	0	0	0	0	0	0	0
0	0	0	0	0	0	0	0	0	0	0	0	0	0	0	0	0	0	0	0	1	0	0	0	0	0	0	0	0	0	0	0	0	0	0	0	0	0	0	0	0	0	0	0	0	0	0	0	0	0
0	0	0	0	0	0	0	0	0	0	0	0	0	0	0	0	0	0	0	0	1	0	0	0	0	0	0	0	0	0	0	0	0	0	0	0	0	0	0	0	0	0	0	0	0	0	0	0	0	0
0	0	0	0	0	0	0	0	0	0	0	0	0	0	0	0	0	0	0	0	1	0	0	0	0	0	0	0	0	0	0	0	0	0	0	0	0	0	0	0	0	0	0	0	0	0	0	0	0	0
0	0	0	0	0	0	0	0	0	0	0	0	0	0	0	0	0	0	0	0	1	0	0	0	0	0	0	0	0	0	0	0	0	0	0	0	0	0	0	0	0	0	0	0	0	0	0	0	0	0
0	0	0	0	0	0	0	0	0	0	0	0	0	0	0	0	0	0	0	0	1	0	0	0	0	0	0	0	0	0	0	0	0	0	0	0	0	0	0	0	0	0	0	0	0	0	0	0	0	0
0	0	0	0	0	0	0	0	0	0	0	0	0	0	0	0	0	0	0	0	1	0	0	0	0	0	0	0	0	0	0	0	0	0	0	0	0	0	0	0	0	0	0	0	0	0	0	0	0	0
0	0	0	0	0	0	0	0	0	0	0	0	0	0	0	0	0	0	0	0	1	0	0	0	0	0	0	0	0	0	0	0	0	0	0	0	0	0	0	0	0	0	0	0	0	0	0	0	0	0
0	0	0	0	0	0	0	0	0	0	0	0	0	0	0	0	0	0	0	0	1	0	0	0	0	0	0	0	0	0	0	0	0	0	0	0	0	0	0	0	0	0	0	0	0	0	0	0	0	0
0	0	0	0	0	0	0	0	0	0	0	0	0	0	0	0	0	0	0	0	1	0	0	0	0	0	0	0	0	0	0	0	0	0	0	0	0	0	0	0	0	0	0	0	0	0	0	0	0	0
0	0	0	0	0	0	0	0	0	0	0	0	0	0	0	0	0	0	0	0	1	0	0	0	0	0	0	0	0	0	0	0	0	0	0	0	0	0	0	0	0	0	0	0	0	0	0	0	0	0
0	0	0	0	0	0	0	0	0	0	0	0	0	0	0	0	0	0	0	0	1	0	0	0	0	0	0	0	0	0	0	0	0	0	0	0	0	0	0	0	0	0	0	0	0	0	0	0	0	0
0	0	0	0	0	0	0	0	0	0	0	0	0	0	0	0	0	0	0	0	1	0	0	0	0	0	0	0	0	0	0	0	0	0	0	0	0	0	0	0	0	0	0	0	0	0	0	0	0	0
0	0	0	0	0	0	0	0	0	0	0	0	0	0	0	0	0	0	0	0	1	0	0	0	0	0	0	0	0	0	0	0	0	0	0	0	0	0	0	0	0	0	0	0	0	0	0	0	0	0
0	0	0	0	0	0	0	0	0	0	0	0	0	0	0	0	0	0	0	0	1	0	0	0	0	0	0	0	0	0	0	0	0	0	0	0	0	0	0	0	0	0	0	0	0	0	0	0	0	0
0	0	0	0	0	0	0	0	0	0	0	0	0	0	0	0	0	0	0	0	1	0	0	0	0	0	0	0	0	0	0	0	0	0	0	0	0	0	0	0	0	0	0	0	0	0	0	0	0	0
0	0	0	0	0	0	0	0	0	0	0	0	0	0	0	0	0	0	0	0	1	0	0	0	0	0	0	0	0	0	0	0	0	0	0	0	0	0	0	0	0	0	0	0	0	0	0	0	0	0
0	0	0	0	0	0	0	0	0	0	0	0	0	0	0	0	0	0	0	0	1	0	0	0	0	0	0	0	0	0	0	0	0	0	0	0	0	0	0	0	0	0	0	0	0	0	0	0	0	0
0	0	0	0	0	0	0	0	0	0	0	0	0	0	0	0	0	0	0	0	1	0	0	0	0	0	0	0	0	0	0	0	0	0	0	0	0	0	0	0	0	0	0	0	0	0	0	0	0	0
0	0	0	0	0	0	0	0	0	0	0	0	0	0	0	0	0	0	0	0	1	0	0	0	0	0	0	0	0	0	0	0	0	0	0	0	0	0	0	0	0	0	0	0	0	0	0	0	0	0
0	0	0	0	0	0	0	0	0	0	0	0	0	0	0	0	0	0	0	0	1	0	0	0	0	0	0	0	0	0	0	0	0	0	0	0	0	0	0	0	0	0	0	0	0	0	0	0	0	0
0	0	0	0	0	0	0	0	0	0	0	0	0	0	0	0	0	0	0	0	1	0	0	0	0	0	0	0	0	0	0	0	0	0	0	0	0	0	0	0	0	0	0	0	0	0	0	0	0	0
0	0	0	0	0	0	0	0	0	0	0	0	0	0	0	0	0	0	0	0	1	0	0	0	0	0	0	0	0	0	0	0	0	0	0	0	0	0	0	0	0	0	0	0	0	0	0	0	0	0
0	0	0	0	0	0	0	0	0	0	0	0	0	0	0	0	0	0	0	0	1	0	0	0	0	0	0	0	0	0	0	0	0	0	0	0	0	0	0	0	0	0	0	0	0	0	0	0	0	0
0	0	0	0	0	0	0	0	0	0	0	0	0	0	0	0	0	0	0	0	1	0	0	0	0	0	0	0	0	0	0	0	0	0	0	0	0	0	0	0	0	0	0	0	0	0	0	0	0	0
0	0	0	0	0	0	0	0	0	0	0	0	0	0	0	1	0	0	0	0	1	0	0	0	0	0	0	0	0	0	0	0	0	0	0	0	0	0	0	0	0	0	0	0	0	0	0	0	0	0
0	0	0	0	0	0	0	0	0	0	0	0	0	0	0	1	0	0	0	0	1	0	0	0	0	0	0	0	0	0	0	0	0	0	0	0	0	0	0	0	0	0	0	0	0	0	0	0	0	0
0	0	0	0	0	0	0	0	0	0	0	0	0	0	0	1	0	0	0	0	1	0	0	0	0	0	0	0	0	0	0	0	0	0	0	0	0	0	0	0	0	0	0	0	0	0	0	0	0	0
0	0	0	0	0	0	0	0	0	0	0	0	0	0	0	1	0	0	0	0	1	0	0	0	0	0	0	0	0	0	0	0	0	0	0	0	0	0	0	1	0	0	0	0	0	0	0	0	0	0
0	0	0	0	0	0	0	0	0	0	0	0	0	0	0	1	0	0	0	0	1	0	0	0	0	0	0	0	0	0	0	0	0	0	0	0	0	0	0	1	0	0	0	0	0	0	0	0	0	0
0	0	0	0	0	0	0	0	0	0	0	0	0	0	0	1	0	0	0	0	1	0	0	0	0	0	0	0	0	0	0	0	0	0	0	0	0	0	0	1	0	0	0	0	0	0	0	0	0	0
0	0	0	0	0	0	0	0	0	0	0	0	0	0	1	1	0	0	0	0	1	0	0	0	0	0	0	0	0	0	0	0	0	0	0	0	0	0	0	1	0	0	0	0	0	0	0	0	0	0
0	0	0	0	0	0	0	0	0	0	0	0	0	0	1	1	0	0	0	0	1	0	0	0	0	0	0	0	0	0	0	0	0	0	0	0	0	0	0	1	0	0	0	0	0	0	0	0	0	0
0	0	0	0	0	0	0	0	0	0	0	0	0	0	1	1	0	0	0	0	1	0	0	0	0	0	0	0	0	0	0	0	0	0	0	0	0	0	0	1	0	0	0	0	0	0	0	0	0	0
0	0	0	0	0	0	0	0	0	0	0	0	0	0	1	1	0	0	0	0	1	0	0	0	0	0	0	0	0	0	0	0	0	0	0	0	0	0	0	1	0	0	0	0	0	0	0	0	0	0
0	0	0	0	0	0	0	0	0	0	0	0	0	0	1	1	0	0	0	0	1	0	0	0	0	0	0	0	0	0	0	1	0	0	0	0	0	0	0	1	0	0	0	0	0	0	0	0	0	0
0	0	0	0	0	0	0	0	0	0	0	0	0	0	1	1	0	0	0	0	1	0	0	0	0	0	0	0	0	0	0	1	1	0	0	0	0	0	0	1	0	0	0	0	0	0	0	0	0	0
0	0	0	0	0	0	0	0	0	0	0	0	0	0	1	1	0	0	0	0	1	0	0	0	0	0	0	0	0	0	0	1	1	0	0	0	0	0	0	1	0	0	0	0	0	0	0	0	0	0
0	0	0	0	0	0	0	0	0	0	0	0	0	0	1	1	0	0	0	0	1	0	0	0	0	0	0	0	0	0	0	1	1	0	0	0	0	0	0	1	0	0	0	0	0	0	0	0	0	0
0	0	0	0	0	0	0	0	0	0	0	0	0	0	1	1	0	0	0	0	1	0	0	0	0	0	0	0	0	0	0	1	1	0	0	0	0	0	0	1	0	0	0	0	0	0	0	0	0	0
0	0	0	0	0	0	0	0	0	0	0	0	0	0	1	1	0	0	0	0	1	0	0	0	0	0	0	0	0	0	0	1	1	0	0	0	1	0	0	1	0	0	0	0	0	0	0	0	0	0
0	0	0	0	0	0	0	0	0	0	0	0	0	0	1	1	0	0	0	0	1	0	0	0	0	0	1	0	0	0	0	1	1	0	0	0	1	0	0	1	0	0	0	0	0	0	0	0	0	0
0	0	0	0	0	0	0	0	0	0	0	0	0	0	1	1	0	0	0	0	1	0	0	0	0	0	1	0	0	0	0	1	1	0	0	0	1	0	0	1	0	0	0	0	0	0	0	0	0	0
0	0	0	0	0	0	0	0	0	0	0	0	0	0	1	1	0	0	0	0	1	0	0	0	0	0	1	0	0	0	0	1	1	0	0	0	1	0	0	1	0	0	0	0	0	0	0	0	0	0
0	0	0	0	0	0	0	0	0	0	0	0	0	0	1	1	0	0	0	0	1	0	0	0	0	0	1	0	0	0	0	1	1	0	0	0	1	0	0	1	0	0	0	0	0	0	0	0	0	0
0	0	0	0	0	0	0	0	0	0	0	0	0	0	1	1	0	0	0	0	1	0	0	0	0	0	1	0	0	0	0	1	1	0	0	0	1	0	0	1	0	0	0	0	0	0	0	0	0	0
0	0	0	0	0	0	0	0	0	0	0	0	0	0	1	1	0	0	0	0	1	0	0	0	0	0	1	0	0	0	1	1	1	0	0	0	1	0	0	1	0	0	0	0	0	0	0	0	0	0
0	0	0	0	0	0	0	0	0	0	0	0	0	0	1	1	0	0	0	0	1	0	0	0	0	0	1	0	0	0	1	1	1	0	0	0	1	0	0	1	0	0	0	0	0	0	0	0	0	0
0	0	0	0	0	0	0	0	0	0	0	0	0	0	1	1	0	0	0	0	1	0	0	0	0	0	1	0	0	0	1	1	1	0	0	0	1	0	0	1	0	0	0	0	0	0	0	0	0	0
0	0	0	0	0	0	0	0	0	0	0	0	0	0	1	1	0	0	0	0	1	0	0	0	0	0	1	0	0	0	1	1	1	0	0	0	1	0	1	1	0	0	0	0	0	0	0	0	0	0
0	0	0	0	0	0	0	0	0	0	0	0	0	0	1	1	0	0	0	0	1	0	0	0	0	0	1	0	0	0	1	1	1	0	0	0	1	0	1	1	0	0	0	0	0	0	0	0	0	0
0	0	0	0	0	0	0	0	0	0	0	0	0	0	1	1	0	0	0	0	1	0	0	0	0	0	1	0	0	0	1	1	1	0	0	0	1	0	1	1	0	0	0	0	0	0	0	0	0	0
0	0	0	0	0	0	0	0	0	0	0	0	0	0	1	1	0	0	0	0	1	0	0	0	0	0	1	0	0	0	1	1	1	0	0	0	1	0	1	1	0	0	0	0	0	0	0	0	0	0
0	0	0	0	0	0	0	0	0	0	0	1	0	0	1	1	0	0	0	0	1	0	0	0	0	0	1	0	0	0	1	1	1	0	0	0	1	0	1	1	0	0	0	0	0	0	0	0	0	0
0	0	0	0	0	0	0	0	0	0	0	1	1	0	1	1	0	0	0	0	1	0	0	0	0	0	1	0	0	0	1	1	1	0	0	0	1	0	1	1	0	0	0	0	0	0	0	0	0	0
0	0	0	0	0	0	0	0	0	0	0	1	1	0	1	1	0	0	0	0	1	0	0	0	0	0	1	0	0	0	1	1	1	2	0	0	1	0	1	1	0	0	0	0	0	0	0	0	0	0
0	0	0	0	0	0	0	0	0	0	0	1	1	0	1	1	0	0	0	0	1	0	0	0	0	0	1	0	0	0	1	1	1	2	0	0	1	0	1	1	0	0	0	0	0	0	0	0	0	0
0	0	0	0	0	0	0	0	0	0	0	1	1	0	1	1	0	0	0	0	1	0	0	0	0	0	1	0	0	0	1	1	1	2	0	0	1	0	1	1	0	0	0	0	0	0	0	0	0	0
0	0	0	0	0	0	0	0	0	0	0	1	1	0	1	1	0	0	0	0	1	0	0	0	0	0	1	0	0	0	1	1	1	2	0	0	1	0	1	1	0	0	0	0	0	0	0	0	0	0
0	0	0	0	0	0	0	0	0	0	0	1	1	0	1	1	0	0	0	0	1	0	0	0	0	0	1	0	0	0	1	1	1	2	0	0	1	0	1	1	0	0	0	0	0	0	0	0	0	0
0	0	0	0	0	0	0	0	0	0	0	1	1	0	1	1	0	0	0	0	1	0	0	0	0	0	1	0	0	0	1	1	1	2	0	0	1	0	1	1	0	0	0	0	0	0	0	0	0	0
0	0	0	0	0	0	0	0	0	0	0	1	1	0	1	1	0	0	0	0	1	0	0	0	0	0	1	0	0	0	1	1	1	2	0	0	1	0	1	1	0	0	0	0	0	0	0	0	0	0
0	0	0	0	0	0	0	0	0	0	0	1	1	0	1	1	0	0	0	0	1	0	0	0	0	0	1	0	0	0	1	1	1	2	0	0	1	0	1	1	0	0	0	0	0	0	0	0	0	0
0	0	0	0	0	0	0	0	0	0	0	1	1	0	1	1	0	0	0	0	1	0	0	0	0	0	1	0	0	0	1	1	1	2	0	0	1	0	1	1	0	0	0	0	0	0	0	0	0	0
0	0	0	0	0	0	0	0	0	0	0	1	1	0	1	1	0	0	0	0	0	0	0	0	0	0	1	0	0	0	1	1	1	2	0	0	1	0	1	1	0	0	0	0	0	0	0	0	0	0
0	0	0	0	0	0	0	0	0	0	0	1	1	0	1	1	0	0	0	0	1	0	0	0	0	0	1	0	0	0	1	1	1	2	0	0	1	0	1	1	0	0	0	0	0	0	0	0	0	0
0	0	0	0	0	0	0	0	0	0	0	1	1	0	1	1	0	0	0	0	1	0	0	0	0	0	1	0	0	0	1	1	1	2	0	0	1	1	1	1	0	0	0	0	0	0	0	0	0	0
0	0	0	0	0	0	0	0	0	0	0	1	1	0	1	1	0	0	0	0	1	0	0	0	0	0	1	0	0	0	1	1	1	2	0	0	0	1	1	1	0	0	0	0	0	0	0	0	0	0
0	0	0	0	0	0	0	0	0	0	0	1	1	0	1	1	0	0	0	0	1	0	0	0	0	0	1	0	0	0	1	1	1	2	0	0	1	1	1	1	0	0	0	0	0	0	0	0	0	0
0	0	0	0	0	0	0	0	0	0	0	1	1	0	1	1	0	0	0	0	1	0	0	0	0	0	1	0	0	0	1	1	1	2	0	0	1	1	1	1	0	0	0	0	0	0	0	0	0	0
0	0	0	0	0	0	0	0	0	0	0	1	1	0	1	1	0	0	0	0	1	0	0	0	0	0	1	0	0	0	1	1	1	2	0	0	0	1	1	1	0	0	0	0	0	0	0	0	0	0
0	0	0	0	0	0	0	0	0	0	0	1	1	0	1	1	0	0	0	0	1	0	0	0	0	0	1	0	0	0	1	1	1	2	0	0	1	1	1	1	0	0	0	0	0	0	0	0	0	0
0	0	0	0	0	0	0	0	0	0	0	1	1	0	1	1	0	0	0	0	1	0	0	0	0	0	1	0	0	0	1	1	1	2	0	0	1	1	1	1	0	0	0	0	0	0	0	0	0	0
0	0	0	0	0	0	0	0	0	0	0	1	1	0	1	1	0	0	0	0	1	0	0	0	0	0	1	0	0	0	1	1	1	2	0	0	1	1	1	1	0	0	0	0	0	0	0	0	0	0
0	0	0	0	0	0	0	0	0	0	0	1	1	0	1	1	0	0	0	0	1	0	0	0	0	0	1	0	0	0	1	1	1	2	0	0	1	1	1	1	0	0	0	0	0	0	0	0	0	0
0	0	0	0	0	0	0	0	0	0	0	1	1	0	1	1	1	0	0	0	1	0	0	0	0	0	1	0	0	0	1	1	1	2	0	0	1	1	1	1	0	0	0	0	0	0	0	0	0	0
0	0	0	0	0	0	0	0	0	0	0	1	1	0	1	1	1	0	0	0	1	0	0	0	0	0	1	0	0	0	1	1	1	2	0	0	1	1	1	1	0	0	0	0	0	0	0	0	0	0
0	0	0	0	0	0	0	0	0	0	0	1	1	0	1	1	1	0	0	0	1	0	0	0	0	0	1	0	0	0	1	1	1	2	0	0	1	1	1	1	1	0	0	0	0	0	0	0	0	0
0	0	0	0	0	0	0	0	0	0	0	1	1	0	1	1	1	0	0	0	1	0	0	0	0	0	1	0	0	0	1	1	1	2	0	0	1	1	1	1	1	0	0	0	0	0	0	0	0	1
0	0	0	0	0	0	0	0	0	0	0	1	1	0	1	1	1	0	0	0	1	0	0	0	0	0	1	0	0	0	1	1	1	2	0	0	1	1	1	1	1	0	0	0	0	0	0	0	0	1
0	0	0	0	0	0	0	0	0	0	0	0	1	0	1	1	1	0	0	0	1	0	0	0	0	0	1	0	0	0	1	1	1	2	0	0	1	1	1	1	1	0	0	0	0	0	0	0	0	1
0	0	0	0	0	0	0	0	0	0	0	1	1	0	1	1	1	0	0	0	1	0	0	0	0	0	1	0	0	0	1	1	1	2	0	0	1	1	1	1	1	0	0	0	0	0	0	0	0	1
0	0	0	0	0	0	0	0	0	0	0	1	1	0	1	1	1	0	0	0	1	0	0	0	0	0	1	0	0	0	1	1	1	2	0	0	1	1	1	1	1	0	0	0	0	0	0	0	0	1
0	0	0	0	0	0	0	0	0	0	0	1	1	0	1	1	1	0	0	0	0	0	0	0	0	0	1	0	0	0	1	1	1	2	0	0	1	1	1	1	1	0	0	0	0	0	0	0	0	1
0	0	0	0	0	0	0	0	0	0	0	1	1	0	1	1	1	0	0	0	1	0	0	0	0	0	1	0	0	0	1	1	1	2	0	0	1	1	1	1	1	0	0	0	0	0	0	1	0	1
0	0	0	0	0	0	0	0	0	0	0	1	1	0	1	1	1	0	0	0	1	0	0	0	0	0	1	1	0	0	1	1	1	2	0	0	1	1	1	1	1	0	0	0	0	0	0	1	0	1
0	0	0	0	0	0	0	0	0	0	0	1	1	0	1	1	1	0	0	0	1	0	0	0	0	0	1	1	0	0	1	1	1	2	0	0	1	1	1	1	1	0	0	0	0	0	0	1	0	1
0	0	0	0	0	0	0	0	1	0	0	1	1	0	1	1	1	0	0	0	1	0	0	0	0	0	1	1	0	0	1	1	1	0	0	0	1	1	1	1	1	0	0	0	0	0	0	1	0	1
0	0	0	0	0	0	0	0	1	0	0	0	1	0	1	1	1	0	0	0	1	0	0	0	0	0	1	1	0	0	1	1	1	0	0	0	1	1	1	1	1	0	0	0	0	0	0	1	0	1
0	0	0	0	0	0	0	0	1	0	0	1	1	0	1	1	1	0	0	0	1	0	0	0	0	0	1	1	0	0	1	1	1	0	0	0	1	1	1	1	1	0	0	0	0	0	0	1	0	1
0	0	0	0	0	0	0	0	1	0	0	1	1	0	1	1	1	0	0	0	1	0	0	0	0	0	1	1	0	0	1	1	1	0	0	0	1	1	1	1	1	0	0	0	0	0	0	1	0	1
0	0	0	0	0	0	0	0	1	0	0	1	1	0	1	1	1	0	0	0	1	0	0	0	0	0	1	1	0	1	1	1	1	0	0	0	1	1	1	1	1	0	0	0	0	0	0	1	0	1
0	0	0	0	0	0	0	0	1	0	0	1	1	1	1	1	1	0	0	0	0	0	0	0	0	0	1	1	0	1	1	1	1	0	0	0	1	1	1	1	1	0	0	0	0	0	0	1	0	1
0	0	0	0	0	0	0	0	1	0	1	1	1	1	1	1	1	0	0	0	0	0	0	0	0	0	1	1	0	1	1	1	1	0	0	0	1	1	1	1	1	0	0	0	0	0	0	1	0	1
0	0	0	0	0	0	0	0	1	0	1	1	1	1	1	1	1	0	0	0	0	0	0	0	1	0	1	1	0	1	1	1	1	0	0	0	1	1	1	1	1	0	0	0	0	0	0	1	0	1
0	0	0	0	0	0	0	0	1	0	1	1	1	1	1	1	1	0	0	0	0	0	0	0	1	0	1	1	0	1	1	1	1	0	0	0	1	1	1	1	1	0	0	0	0	0	0	1	0	1
0	0	0	0	0	0	0	0	1	0	1	1	1	1	1	1	1	0	0	0	0	0	0	0	1	0	1	1	0	1	1	1	0	1	0	0	1	1	1	1	1	0	0	0	0	0	0	1	0	1
0	0	0	0	0	0	0	0	1	0	1	1	1	1	1	1	1	0	0	0	0	0	1	0	1	0	1	1	0	1	1	1	1	1	0	0	1	1	1	1	1	0	0	0	0	0	0	1	0	1
0	0	0	0	0	0	0	0	1	0	1	1	1	1	1	1	1	0	0	0	0	0	1	0	1	0	1	1	0	1	1	1	1	1	0	0	1	1	1	1	0	0	0	0	0	0	0	1	0	1
0	0	0	0	0	0	0	0	1	0	1	1	1	1	1	1	1	0	0	0	0	0	1	0	1	0	1	1	0	1	1	1	1	1	0	0	1	1	1	1	1	0	0	0	0	0	0	1	0	1
0	0	0	0	0	0	0	0	1	0	1	1	1	1	1	1	1	0	0	0	0	0	1	0	1	0	1	1	0	1	1	1	1	1	0	0	1	1	1	1	1	0	0	0	0	0	0	1	0	1
0	0	0	0	0	0	0	0	1	0	1	1	1	1	1	1	1	0	0	0	0	0	1	0	1	0	1	1	1	1	1	1	1	1	0	1	1	1	1	1	1	0	1	0	0	0	0	1	0	1
0	0	0	0	0	0	0	0	1	0	1	1	1	1	1	1	1	0	0	0	0	0	1	0	1	0	1	1	1	1	1	1	1	1	0	1	1	1	1	1	1	0	1	0	0	0	0	1	0	1
0	0	0	0	0	0	0	0	1	0	1	1	1	1	1	1	1	0	0	0	0	0	1	0	1	0	1	1	1	1	1	1	1	1	0	1	1	1	1	1	1	0	1	0	0	0	0	1	0	1
0	0	0	0	0	0	0	0	1	0	1	1	1	1	1	1	1	0	0	0	0	0	1	0	1	0	1	1	1	1	1	1	1	1	0	1	1	1	1	1	1	0	1	0	0	0	0	1	0	1
0	0	0	0	0	0	0	0	1	0	1	1	1	1	1	1	1	0	0	0	0	0	1	0	1	0	1	1	1	1	1	1	1	1	0	1	1	1	1	1	1	0	1	0	0	0	0	1	1	1
0	0	0	0	0	0	0	0	1	0	1	1	1	1	1	1	1	0	0	0	0	0	1	0	1	0	1	1	1	1	1	1	1	1	0	1	1	1	1	1	1	0	1	0	0	0	0	1	1	1
0	0	0	0	0	0	0	0	1	0	1	1	1	1	1	1	1	0	0	0	0	0	1	0	1	0	1	1	1	1	1	1	1	1	0	1	1	1	1	1	1	0	1	0	0	0	0	1	1	1
0	0	0	0	0	0	0	0	1	0	1	1	1	1	1	1	1	0	0	0	0	0	1	0	1	0	1	1	1	1	1	1	1	1	0	1	1	1	1	1	1	0	1	0	0	0	0	1	1	1
0	0	0	0	0	0	0	0	1	0	1	1	1	1	1	1	1	0	0	0	0	0	1	0	1	0	1	1	1	1	1	1	1	1	0	1	1	1	1	1	1	0	1	0	0	0	0	1	1	1
0	0	0	0	0	0	0	1	1	0	1	1	1	1	1	1	1	0	0	0	0	0	1	0	1	0	1	1	1	1	0	1	1	1	0	1	1	1	1	1	1	0	1	0	0	0	0	1	1	1
0	0	1	0	0	0	0	1	1	0	1	1	1	1	1	1	1	0	0	0	0	0	1	1	1	0	1	1	1	1	1	1	1	1	0	1	1	1	1	1	1	0	1	0	0	0	0	1	1	1
0	0	1	0	0	0	0	1	1	0	1	1	1	1	1	1	1	0	0	0	0	0	1	1	1	0	1	1	1	1	1	1	1	1	0	1	1	1	1	1	1	0	1	0	0	0	0	1	1	1
0	0	1	0	0	0	0	1	1	0	1	1	1	1	1	1	1	0	0	0	0	0	1	1	1	0	1	1	1	1	1	1	1	1	0	1	1	1	1	1	1	0	1	0	0	0	0	1	1	1
0	0	1	0	0	0	0	1	1	0	1	1	1	1	1	1	1	0	0	0	0	0	1	1	1	0	1	1	1	0	1	1	1	1	0	1	1	1	1	1	1	0	1	0	0	0	0	1	1	1
0	0	1	0	0	0	0	1	1	0	1	1	1	1	1	1	1	0	0	0	0	0	1	1	1	0	1	1	1	1	1	1	1	1	0	1	1	1	1	1	1	0	1	0	0	0	0	1	1	1
0	0	1	0	0	0	0	1	1	0	1	1	1	1	1	1	1	0	0	0	0	0	1	1	1	0	1	1	1	1	1	1	0	1	0	1	1	1	1	1	1	0	1	0	0	0	0	1	1	1
0	0	1	0	0	0	0	1	1	0	1	1	1	1	1	1	1	0	0	0	0	0	1	1	1	0	1	1	1	1	1	1	1	1	0	1	1	1	1	1	1	0	1	0	0	0	0	1	1	1
0	0	1	0	0	0	0	1	1	0	1	1	1	1	1	1	1	0	0	1	0	0	1	1	1	0	1	1	1	1	1	1	1	1	0	1	1	1	1	1	1	0	1	0	0	0	0	1	1	1
0	0	1	0	0	0	0	1	1	0	1	1	1	1	0	1	1	0	0	1	0	0	1	1	1	0	1	1	1	1	1	1	1	1	0	1	0	1	1	1	1	0	1	0	0	0	0	1	1	1
0	0	1	0	0	0	0	1	1	0	1	1	1	1	1	1	1	0	0	1	0	0	0	1	1	0	1	1	1	1	1	1	1	1	0	1	0	1	1	1	1	0	1	0	0	0	0	1	1	1
0	0	1	0	0	0	0	1	1	0	1	1	1	1	1	1	1	0	0	1	0	0	1	1	1	0	1	1	1	1	1	1	1	0	0	1	1	1	1	1	1	0	1	0	0	0	0	1	1	1
0	0	1	0	0	0	0	1	1	0	1	1	1	1	1	1	1	0	0	1	0	0	1	1	1	0	1	1	1	1	1	1	1	1	0	1	1	1	1	1	1	0	1	1	0	0	0	1	1	1
0	0	1	0	0	0	0	1	1	0	1	1	1	1	1	1	1	0	0	1	0	0	1	1	1	0	1	1	1	1	1	1	1	1	0	1	1	1	1	1	1	0	0	1	0	0	0	1	1	1
0	0	1	0	0	0	0	1	1	0	1	1	1	1	1	1	1	0	0	1	0	0	1	1	1	0	1	1	1	1	1	1	1	1	0	1	1	1	1	1	1	0	1	1	0	0	0	1	1	1
0	0	1	0	0	0	0	1	1	0	1	1	1	1	1	1	1	0	0	1	0	0	1	1	1	0	1	1	1	1	1	1	1	1	0	1	1	1	1	1	1	0	1	1	0	0	0	1	1	1
0	0	1	0	0	0	0	1	1	0	1	1	1	1	1	1	1	0	0	1	0	0	1	1	1	0	1	1	1	1	1	1	1	1	0	1	1	1	1	1	1	0	1	1	0	0	0	1	1	1
0	0	1	0	0	0	0	1	1	0	1	1	1	1	1	1	1	0	0	1	0	0	1	1	1	0	1	1	1	1	1	1	1	1	0	1	1	1	1	1	1	0	1	1	0	0	0	1	1	1
0	0	1	0	0	0	0	1	1	0	1	1	1	1	1	1	1	0	0	1	0	0	1	1	1	0	1	1	1	1	1	1	1	1	0	1	1	1	1	1	1	0	1	1	0	0	0	1	1	1
0	0	1	0	0	0	0	1	1	0	1	1	1	1	0	1	1	0	0	1	0	0	1	1	1	0	1	1	1	1	1	1	1	1	0	1	1	1	1	1	1	0	1	1	0	0	0	1	1	1
0	0	1	0	0	0	0	1	1	0	1	1	1	1	1	1	1	0	0	1	0	0	1	1	1	0	1	1	1	1	1	1	1	1	0	1	1	1	1	1	1	0	1	1	1	0	0	1	1	1
0	0	1	0	0	0	0	1	1	0	1	1	1	1	1	1	1	0	0	1	0	0	1	1	1	0	1	1	1	1	1	1	1	1	0	1	1	1	1	1	1	1	1	1	1	0	0	1	1	1
0	0	1	0	0	0	0	1	1	0	1	1	1	1	1	1	1	0	0	1	0	0	1	1	1	0	1	1	1	1	1	1	1	1	0	1	1	1	1	1	1	1	1	1	1	0	0	1	1	1
0	0	1	0	0	0	0	1	1	0	1	1	1	1	1	1	1	0	0	1	0	0	1	1	1	0	1	1	1	1	1	1	1	1	0	1	1	1	1	1	1	1	1	1	1	0	0	1	1	1
0	0	1	0	0	0	0	1	1	0	1	1	1	1	1	1	1	0	0	1	0	0	1	1	1	0	1	1	1	1	1	1	1	1	0	1	1	1	1	1	1	1	1	1	1	0	0	1	1	1
0	0	1	0	0	0	0	1	1	0	1	1	1	1	1	1	1	0	0	1	0	0	1	1	1	0	1	1	1	1	1	1	1	1	0	1	0	1	1	1	1	1	1	1	1	0	0	1	1	1
0	0	1	0	0	0	0	1	1	0	1	1	1	1	1	1	1	0	1	1	0	0	1	1	1	0	1	1	1	1	1	1	1	1	0	1	1	1	1	1	1	1	1	1	1	0	0	1	1	1
0	0	1	0	0	0	0	1	1	0	1	1	1	1	0	1	1	0	1	1	0	0	1	1	1	0	1	1	1	1	1	1	1	1	0	1	1	1	1	1	1	1	0	1	1	0	0	1	1	1
0	0	1	0	0	0	0	1	1	0	1	1	1	1	0	1	1	0	1	1	0	0	1	1	1	1	1	1	1	1	1	1	1	1	0	1	1	1	1	1	1	1	1	1	1	0	0	1	1	1
0	0	1	0	0	0	0	0	1	1	1	1	1	1	0	1	1	0	1	1	0	0	1	1	1	1	1	1	1	1	1	1	1	1	0	1	1	1	1	1	1	1	1	1	1	0	0	1	1	1
0	0	1	0	0	0	0	1	1	1	1	1	1	1	0	1	1	0	1	1	0	0	1	1	1	1	1	1	1	1	1	1	1	1	0	1	1	1	1	1	1	1	1	1	1	0	0	1	0	1
0	0	1	0	0	0	0	1	1	1	1	1	1	1	0	1	1	0	1	1	0	0	1	1	1	1	1	1	1	1	1	1	1	1	0	1	1	1	1	1	1	1	1	1	1	0	0	1	1	1
0	0	1	0	0	0	0	1	1	1	1	1	1	1	0	1	1	0	1	1	0	0	1	1	1	1	1	1	1	1	1	1	1	1	0	1	0	1	1	1	1	1	1	1	1	0	0	1	1	1
0	0	1	0	0	0	0	1	1	1	1	1	1	1	0	1	1	0	1	1	0	0	1	1	1	1	1	1	1	1	1	1	1	1	0	1	1	1	1	1	1	1	1	1	1	0	0	1	1	1
0	0	1	0	0	0	0	1	1	1	1	1	1	0	0	1	1	0	1	1	0	0	1	1	1	1	1	1	1	1	1	1	1	1	0	1	1	1	1	1	1	1	1	1	1	0	0	1	1	1
0	0	1	0	0	0	0	1	1	1	1	1	1	1	0	1	1	0	1	1	0	0	0	1	1	1	1	1	1	1	1	1	1	1	0	1	1	1	1	1	1	1	1	1	1	0	0	1	1	1
0	0	1	0	0	0	0	1	1	1	1	1	1	1	0	1	1	0	1	1	0	0	1	1	1	1	1	1	1	1	1	1	1	1	0	1	1	1	1	1	1	1	1	1	1	0	0	1	1	1
0	0	1	0	0	0	1	1	1	1	1	1	1	1	0	1	1	0	1	1	0	0	1	1	1	1	1	1	1	1	1	1	1	1	0	1	1	1	1	1	1	1	1	1	1	0	0	1	1	1
0	0	1	0	0	0	1	1	1	1	1	1	1	1	0	1	1	0	1	1	0	0	1	1	1	1	1	1	1	1	1	1	1	1	0	1	1	1	1	1	1	1	1	1	1	0	0	1	1	1
0	0	1	0	0	0	1	1	1	1	1	1	1	1	0	1	1	1	1	1	0	1	1	1	1	1	1	1	1	1	1	1	1	1	0	1	1	1	1	1	1	1	1	1	1	0	0	1	1	1
0	0	1	0	0	0	1	1	1	1	1	1	1	1	0	1	1	1	1	1	0	1	1	1	1	1	1	1	1	1	1	1	1	1	0	1	1	1	1	1	1	1	1	1	1	0	0	1	1	1
0	0	1	0	0	0	1	1	1	1	1	1	1	1	0	1	1	1	1	1	0	1	1	1	1	1	1	1	1	1	1	1	1	1	0	1	1	1	1	1	1	1	1	1	1	0	0	1	1	1
0	0	1	0	0	0	1	1	1	1	1	1	1	1	0	1	1	1	1	1	0	1	1	1	1	1	1	1	1	1	1	1	1	1	0	1	1	1	1	1	1	1	1	1	1	0	0	1	1	1
1	0	0	0	1	0	1	1	1	1	0	1	1	1	0	0	1	1	1	1	0	1	1	1	1	1	1	1	1	1	1	1	1	1	0	1	1	1	1	1	1	1	1	1	1	0	0	1	1	1
1	0	1	0	1	0	1	1	1	1	1	1	1	1	0	1	1	1	1	1	0	1	1	1	1	1	1	1	1	1	1	1	1	1	0	1	1	1	1	1	1	1	1	1	1	0	0	1	1	1
1	0	1	0	1	0	1	1	1	1	1	1	1	1	0	1	1	1	1	1	0	1	1	1	1	1	1	1	1	1	1	1	1	1	0	1	1	1	1	1	1	1	1	1	1	0	0	1	1	1
1	0	1	0	1	0	1	1	1	1	1	1	0	1	0	1	1	1	1	1	0	1	1	1	1	1	1	1	1	1	1	1	1	1	0	1	1	1	1	1	1	1	1	1	1	0	0	1	1	1
1	0	1	0	1	0	1	1	1	1	1	1	1	1	0	1	1	1	1	1	0	1	1	1	1	1	1	1	1	1	1	1	1	1	0	1	1	0	1	1	1	1	1	1	1	0	0	1	1	1
1	0	1	0	1	0	1	1	1	1	1	1	1	1	0	1	1	1	1	1	0	1	1	1	1	1	1	1	1	1	1	1	1	1	1	1	1	1	1	1	1	1	1	1	1	0	0	1	1	1
1	0	1	0	1	0	1	1	1	1	1	1	1	1	0	1	1	1	1	1	0	1	0	1	1	1	1	1	1	1	1	1	1	1	1	1	1	1	1	1	1	1	1	1	1	0	0	1	1	1
1	0	1	0	1	0	1	0	1	1	1	1	1	1	0	1	1	1	1	1	0	1	1	1	1	1	1	1	1	1	1	1	1	1	1	1	1	1	1	1	1	1	1	1	1	0	0	1	1	1
1	0	1	0	1	0	1	0	1	1	1	1	1	1	0	1	1	1	1	1	0	1	1	1	1	1	1	1	1	1	1	1	1	0	1	1	1	1	1	1	1	1	1	1	1	0	0	1	1	1
1	0	1	0	1	0	1	0	1	1	1	1	1	1	0	1	1	1	1	1	0	1	1	1	1	1	1	1	1	1	1	1	1	1	1	1	1	1	1	1	1	1	1	1	1	0	0	1	1	1
1	0	1	0	1	0	1	0	1	1	1	1	1	1	0	1	1	1	1	1	0	1	1	1	1	1	1	1	1	1	1	1	1	1	1	1	1	1	1	1	1	1	1	1	1	0	0	1	1	1
1	0	1	0	1	0	1	0	1	1	1	1	1	1	0	1	1	1	1	1	0	1	1	1	1	0	1	1	1	1	1	1	1	1	1	1	1	1	1	1	1	1	1	1	1	0	0	1	1	1
1	0	1	0	1	0	1	0	1	1	1	1	1	1	0	1	1	1	1	1	0	1	1	1	1	1	1	1	1	1	1	1	1	1	1	1	1	1	1	1	1	1	1	1	1	0	0	1	1	1
1	0	1	0	1	0	1	1	1	1	0	1	1	1	0	1	1	1	1	1	0	1	1	1	1	1	1	1	1	1	1	1	1	1	1	1	1	1	1	1	1	1	1	1	0	0	0	1	1	1
1	0	1	0	1	0	1	1	1	1	1	1	1	1	0	1	1	1	1	1	0	1	1	1	1	1	1	1	1	1	1	1	1	1	1	1	1	1	1	1	1	1	1	1	1	0	0	1	1	1
1	0	1	0	1	0	1	1	1	1	1	1	1	1	0	1	1	1	1	1	0	1	1	1	1	1	1	1	1	1	1	1	1	1	1	1	1	1	1	1	1	1	1	1	1	0	0	1	1	1
1	0	1	0	1	0	1	1	1	1	1	1	1	1	0	1	1	1	1	1	0	1	1	1	1	1	1	1	1	1	1	1	1	1	1	1	1	1	1	1	1	1	1	1	1	0	0	1	1	1
1	0	1	0	1	0	1	1	1	1	1	1	1	1	0	1	1	1	1	1	0	1	1	1	1	1	1	1	1	1	1	1	1	1	1	1	1	1	1	1	1	1	1	1	1	0	0	1	1	1
1	0	1	0	1	0	1	1	1	1	1	1	1	1	0	1	1	1	1	1	0	1	1	1	1	1	1	1	1	1	1	1	1	1	1	1	1	1	1	1	1	1	1	1	1	0	0	1	1	1
1	0	1	0	1	0	1	1	1	1	1	1	1	1	0	1	1	0	1	1	0	1	1	1	1	1	1	1	1	1	1	1	1	1	1	1	1	1	1	1	1	1	1	1	1	0	1	1	1	1
1	0	1	0	1	0	1	1	1	1	1	1	1	1	0	1	1	1	1	1	0	1	1	1	1	1	1	1	1	1	1	1	1	1	1	1	1	1	1	1	1	1	1	1	1	0	1	1	1	1
1	0	1	0	1	0	1	1	1	0	1	1	1	1	0	1	1	1	1	1	0	1	1	1	1	1	1	1	1	1	1	1	1	1	1	1	1	1	1	1	1	1	1	1	1	0	1	1	1	1
1	0	1	0	0	0	1	1	1	1	1	1	1	1	0	1	1	1	1	1	0	1	1	1	1	1	1	1	1	1	1	1	1	1	1	1	1	1	1	1	1	1	1	1	1	0	1	1	1	1
1	0	1	0	1	0	1	1	1	1	1	1	1	1	0	0	1	1	1	1	0	1	1	1	1	1	1	1	1	1	1	1	1	1	1	1	1	1	1	1	1	0	1	1	1	0	1	1	1	1
1	0	1	0	1	0	1	1	1	1	1	1	1	1	0	1	1	1	1	1	0	1	1	1	1	1	1	1	1	1	1	1	1	1	1	1	1	1	1	1	1	1	1	1	1	0	1	1	1	1
1	0	1	0	1	0	1	1	1	0	1	1	1	1	0	1	1	0	1	1	0	1	1	1	1	1	1	1	1	1	1	1	1	1	1	1	1	1	1	1	1	1	1	1	1	0	1	1	1	1
1	0	1	0	1	0	1	1	1	1	1	1	1	1	0	1	1	0	1	1	0	1	1	1	1	1	1	1	1	1	1	1	1	1	1	1	1	1	1	1	1	1	1	1	1	0	1	1	1	1
1	0	1	0	1	0	1	1	1	1	1	1	1	1	0	1	1	0	1	1	0	1	1	1	1	1	1	1	1	1	1	1	1	1	1	1	1	1	1	1	1	1	1	1	1	0	1	1	1	1
1	0	1	0	1	0	1	1	1	1	1	1	1	1	0	1	1	0	1	1	0	1	1	1	1	1	1	1	1	1	1	1	1	1	1	1	1	1	1	1	1	1	1	1	1	0	1	1	1	1
1	0	1	0	1	0	1	1	1	1	1	1	1	1	0	1	1	0	1	1	0	1	1	1	1	1	1	1	1	1	1	1	1	1	1	1	1	1	1	1	0	1	1	1	1	0	1	1	1	1
1	0	1	0	1	0	1	1	1	1	1	1	1	1	0	1	1	0	1	1	0	1	1	1	1	1	1	1	1	1	1	1	1	1	1	1	1	1	1	1	1	1	1	1	1	0	1	1	1	1
1	0	1	0	1	0	1	1	1	1	1	1	1	1	1	1	1	0	1	1	0	1	1	0	1	1	1	1	1	1	1	1	1	1	0	1	1	1	1	1	1	1	1	1	1	0	1	1	1	1
1	0	1	0	1	0	1	1	1	1	1	1	1	1	1	1	1	0	1	1	0	1	1	1	1	1	1	1	1	1	1	1	1	1	1	1	1	1	1	1	1	1	1	1	1	0	1	1	1	1
1	0	1	0	1	0	1	1	1	1	1	1	1	1	1	1	1	1	1	1	0	1	1	1	1	1	1	1	1	1	1	1	1	1	1	1	1	1	1	1	1	1	1	1	1	0	1	1	1	1
1	0	1	0	1	0	1	1	1	1	1	1	1	1	1	1	1	1	1	1	0	1	1	1	1	1	1	1	1	1	1	1	1	1	1	1	1	1	1	1	1	1	1	1	1	0	1	1	1	1
1	0	1	0	1	0	1	1	1	1	1	1	1	1	1	1	1	1	1	1	0	1	1	1	1	1	1	1	1	1	1	1	1	1	1	1	1	1	1	1	1	1	1	1	1	0	1	1	1	1
1	0	1	0	1	0	1	1	1	1	1	1	1	1	1	1	1	1	1	1	0	1	1	1	1	1	1	1	1	1	1	1	1	1	1	1	1	1	1	1	1	1	1	1	1	0	1	1	1	1
1	0	1	0	1	0	1	1	1	1	1	1	1	1	1	1	1	1	0	1	0	1	1	1	1	1	1	1	1	1	1	1	1	1	1	1	1	1	0	1	1	1	1	1	1	0	1	1	1	1
1	0	1	0	1	0	1	1	1	0	1	1	1	1	1	1	1	1	1	1	0	1	1	1	1	1	1	1	1	1	1	1	1	1	1	1	1	1	1	1	1	1	1	1	1	0	1	1	1	1
1	0	1	0	1	0	1	1	1	1	1	1	1	1	1	1	1	1	1	1	0	1	1	0	1	1	1	1	1	1	1	1	1	1	1	1	1	0	1	1	0	1	1	1	1	0	1	1	1	1
1	0	1	0	1	0	1	0	1	1	1	1	1	1	1	1	1	1	1	1	0	1	1	1	1	1	1	1	1	1	1	1	1	1	1	1	1	1	1	1	0	1	1	1	1	0	1	1	1	1
1	0	1	0	1	0	1	1	1	1	1	1	1	1	1	1	1	1	1	1	0	1	1	1	1	1	1	1	1	1	1	1	1	1	1	1	1	1	1	1	0	1	1	1	1	0	1	1	1	1
1	0	1	0	1	0	1	1	1	1	1	1	1	1	1	1	1	1	1	1	0	1	1	1	1	1	1	1	1	1	1	1	1	1	1	1	1	1	1	1	0	1	1	1	1	0	1	1	1	1
1	0	1	0	1	0	1	1	1	1	1	1	1	1	1	1	1	1	1	1	0	1	1	1	1	1	1	1	1	1	1	1	1	1	1	1	1	1	1	1	0	1	1	1	1	0	1	1	1	1
1	0	1	0	1	0	0	1	1	1	1	1	1	1	1	1	1	1	1	1	0	1	1	1	1	1	1	1	1	1	1	1	1	1	1	1	1	1	1	1	0	1	1	1	1	0	1	1	1	1
1	0	1	0	1	0	1	1	1	1	1	1	1	1	1	1	1	1	1	1	0	1	1	1	1	1	1	1	1	1	1	1	1	1	1	1	1	1	1	1	0	1	1	1	1	0	1	1	1	1
1	0	1	0	1	0	1	1	1	1	1	1	1	1	1	1	1	1	1	1	0	1	1	1	1	1	1	1	1	1	1	1	1	0	1	1	1	1	1	1	0	1	1	1	1	0	1	1	1	1
1	0	1	0	1	0	1	1	1	0	1	1	1	1	1	1	1	1	1	1	0	1	1	1	1	1	1	1	1	1	1	1	1	1	0	1	1	0	1	1	0	1	1	1	1	0	1	1	1	1
1	0	1	0	1	0	0	1	1	1	1	1	1	1	1	1	1	1	1	1	0	1	1	1	1	1	1	1	1	1	1	1	1	1	1	1	1	1	1	1	0	1	1	1	1	0	1	1	1	1
1	0	1	0	1	0	0	1	1	1	1	1	1	1	0	1	1	1	1	1	0	1	1	1	1	1	1	1	1	1	1	1	1	1	1	1	1	1	1	1	0	1	1	1	1	0	1	1	1	1
1	0	1	0	0	0	0	0	1	1	1	1	1	1	1	1	1	1	1	1	0	1	1	1	1	1	1	1	1	1	1	1	1	1	1	1	1	1	1	1	0	1	1	1	1	0	1	1	1	1
1	0	1	0	1	0	0	1	1	1	1	1	1	1	1	1	1	1	1	1	0	1	1	1	1	1	1	1	1	1	1	1	1	1	1	1	1	0	1	1	0	1	1	1	1	0	1	1	1	1
1	0	1	0	1	0	0	1	1	1	1	0	1	1	1	1	0	1	1	1	0	1	1	1	1	1	1	1	1	1	1	1	1	1	1	1	1	1	1	1	0	1	1	1	1	0	1	1	1	1
1	0	1	0	1	0	0	1	1	1	1	1	1	1	1	1	1	1	1	1	0	1	1	1	1	1	1	1	1	1	1	1	1	1	1	1	1	1	1	1	0	1	1	1	0	0	1	1	1	1
1	0	1	0	1	0	0	1	1	1	1	1	1	1	1	1	1	1	1	1	0	1	1	1	1	1	1	1	1	1	1	1	1	1	1	1	1	1	1	1	0	1	1	1	1	0	1	1	1	1
1	0	1	0	1	0	0	0	1	1	1	1	1	0	1	1	0	1	1	1	0	1	1	1	1	1	1	1	1	1	1	1	1	1	1	1	1	1	1	1	1	1	1	1	1	0	1	1	1	1
1	0	1	0	1	0	0	0	1	1	1	1	1	1	1	1	1	1	1	1	0	1	1	1	1	1	1	1	1	1	1	1	1	1	1	1	1	1	1	1	1	1	1	1	1	0	1	1	1	1
1	0	1	0	1	0	0	0	1	1	1	1	1	1	1	1	1	1	1	0	0	1	1	1	1	1	1	1	0	1	1	1	1	1	1	1	1	1	1	1	1	1	1	1	1	0	1	1	1	1
1	0	1	0	1	0	0	0	1	1	1	1	1	1	1	1	1	1	1	1	0	1	1	1	1	1	1	1	1	1	1	1	1	1	0	1	1	1	1	1	1	1	1	1	1	0	1	1	1	1
1	0	1	0	1	0	0	0	1	1	1	1	1	1	1	1	1	1	1	1	0	1	1	1	1	1	1	1	1	1	1	1	1	1	1	1	1	1	1	1	1	1	1	1	1	0	1	1	1	1
1	0	1	0	1	0	0	0	1	1	1	1	1	0	1	1	1	1	1	1	0	1	1	1	1	1	1	1	1	1	1	1	1	1	1	1	1	1	1	1	1	1	1	1	1	0	1	1	1	1
1	0	1	0	1	0	0	0	1	1	1	1	1	1	1	1	1	1	1	1	0	1	1	1	1	1	1	1	0	1	1	1	1	1	1	1	1	1	1	1	1	1	1	1	1	0	1	1	1	1
1	0	1	0	1	0	0	0	1	1	1	1	1	1	1	1	1	1	1	1	0	1	1	1	1	1	1	1	1	1	1	1	1	1	1	1	1	1	1	1	1	1	1	1	1	0	1	1	1	1
1	0	1	0	1	0	0	0	1	1	1	1	1	1	1	1	1	1	1	1	1	1	1	0	1	1	1	1	1	1	1	1	1	1	1	1	1	1	1	1	1	1	1	1	1	0	1	1	1	1
1	0	1	0	1	0	0	0	1	1	1	1	1	1	1	1	1	1	1	1	1	1	1	1	1	1	1	1	1	1	1	1	1	1	1	1	1	1	1	1	1	1	1	1	1	0	1	1	1	1
1	0	1	0	1	0	1	0	1	1	1	1	1	1	1	1	1	1	1	1	1	1	1	1	1	1	1	1	1	1	1	1	1	1	1	1	1	1	1	1	1	1	1	1	1	0	1	1	1	1
1	0	1	0	1	0	1	0	1	1	1	1	1	1	1	1	1	1	1	1	1	1	0	1	1	1	1	1	1	1	1	1	1	1	1	1	1	1	1	1	1	1	1	1	1	0	1	1	1	1
1	0	1	0	1	0	1	0	1	1	1	1	1	1	1	1	1	1	1	1	1	1	1	1	1	1	1	1	1	1	1	1	1	1	1	1	1	1	1	1	1	1	1	1	1	0	1	1	1	1
1	0	1	0	1	0	1	0	1	1	1	1	1	1	1	1	1	1	1	1	1	1	1	1	1	1	1	1	1	1	1	1	1	1	1	1	1	1	1	1	1	1	1	1	1	0	1	1	1	1
1	0	1	0	0	0	1	0	1	1	1	1	1	1	1	1	1	1	1	1	1	1	1	1	1	1	1	1	1	1	1	1	1	1	1	1	1	1	1	1	1	1	1	1	1	0	1	1	1	1
1	0	1	0	1	0	1	0	1	1	1	1	1	1	1	1	1	1	1	1	1	1	1	1	0	1	1	1	1	1	1	0	1	1	1	1	1	1	1	1	1	1	1	1	1	0	1	1	1	0
1	0	1	0	1	0	1	0	1	1	1	1	1	1	1	1	1	1	1	1	1	1	0	1	1	1	1	1	1	1	1	1	0	1	1	1	1	1	1	1	1	1	1	1	0	0	1	1	1	1
1	0	1	0	1	0	1	0	1	1	1	1	1	1	1	1	1	1	1	1	1	1	0	1	1	1	1	1	1	1	1	1	1	1	1	1	1	1	1	1	1	1	1	1	1	0	1	1	1	1
1	0	1	0	1	0	1	0	1	1	1	1	1	1	1	1	1	1	1	1	1	1	0	1	1	1	1	1	1	1	1	1	1	1	1	1	1	1	1	1	1	1	1	1	1	0	1	1	1	1
1	0	1	0	1	0	1	0	1	1	1	1	1	1	1	1	1	1	1	1	1	1	0	1	1	1	1	1	1	1	1	1	1	1	1	1	1	1	1	1	1	1	1	0	1	0	1	1	1	1
1	0	1	0	1	0	0	1	1	1	1	1	1	1	1	1	1	1	1	1	1	1	0	1	1	1	1	1	1	1	1	1	1	1	1	1	1	1	1	1	0	1	1	1	1	0	1	1	1	1
1	0	1	0	1	0	1	1	1	1	1	1	1	1	1	1	1	0	1	1	1	1	0	1	0	1	1	1	1	1	1	1	1	1	1	1	1	1	1	1	1	0	1	1	1	0	1	1	1	1
1	0	1	0	1	0	1	1	1	1	1	1	1	1	1	1	1	1	1	1	1	1	0	1	1	1	1	1	1	1	1	1	1	1	1	1	1	1	1	1	1	1	1	1	1	0	1	1	1	1
1	0	1	0	1	0	1	1	1	1	1	1	1	1	1	1	1	1	1	1	1	1	0	1	1	1	1	1	1	1	1	1	1	1	1	1	1	1	1	1	0	1	1	1	1	0	1	1	1	1
1	0	1	0	1	0	1	1	1	1	1	1	1	0	1	1	1	1	1	1	1	1	0	0	1	1	1	1	0	1	1	1	1	1	1	1	1	1	1	1	1	1	1	1	1	0	1	0	1	1
1	0	1	0	1	0	1	0	1	1	1	1	1	1	1	1	1	1	1	1	1	1	0	1	1	1	1	1	1	1	1	1	1	1	1	1	0	1	1	1	1	1	1	1	1	0	1	1	1	1
1	0	1	0	1	0	1	1	1	1	1	1	1	1	1	1	1	1	1	1	1	1	0	1	1	1	1	1	1	1	1	1	1	1	1	1	1	1	1	1	1	1	1	1	1	0	1	1	1	1
1	0	1	0	1	0	1	1	1	1	1	1	1	1	1	1	1	1	1	1	1	1	0	1	1	1	1	1	1	1	1	1	1	1	1	1	1	1	1	1	1	1	1	1	1	0	1	1	1	1
1	0	1	0	1	0	1	1	1	1	1	1	0	1	1	1	1	0	1	1	1	1	0	1	1	1	1	1	1	1	1	1	1	1	1	1	1	1	1	1	1	1	1	1	1	0	1	1	1	1
1	0	1	0	1	0	1	1	1	1	1	1	1	1	1	1	1	1	1	1	0	1	0	1	1	1	1	1	1	1	1	1	1	1	1	1	1	1	1	1	1	1	1	1	1	0	1	1	1	1
1	0	1	0	1	0	1	1	1	1	1	1	1	1	1	1	1	1	1	1	1	1	0	1	1	1	1	1	1	1	1	1	1	1	1	1	1	1	1	1	1	1	1	1	1	0	1	1	1	1
1	0	1	0	1	0	1	1	1	1	1	1	1	1	1	1	1	1	1	1	1	1	0	1	1	1	1	1	1	1	1	1	1	1	1	1	1	1	1	1	1	1	1	1	1	0	1	1	1	1
1	0	1	0	1	0	1	1	1	1	1	1	1	1	1	1	1	1	1	1	0	1	0	1	1	1	1	1	1	1	1	1	1	1	1	0	1	1	1	1	1	1	1	1	0	0	1	1	1	1
1	0	1	0	1	0	1	1	1	1	1	0	1	1	1	1	1	1	1	1	1	1	0	1	1	1	1	1	1	1	1	1	1	1	1	1	1	1	1	1	1	1	1	1	0	0	1	1	1	1
1	0	1	0	1	0	1	1	1	1	1	1	1	1	1	1	1	1	1	1	1	1	0	1	1	1	1	1	1	1	0	1	1	1	1	1	1	1	1	1	1	0	1	1	0	0	1	1	1	1
1	0	1	0	1	0	1	1	1	1	1	1	1	1	1	1	1	1	1	1	1	1	0	1	1	1	1	1	1	1	1	1	1	1	1	1	1	1	1	1	1	1	1	1	0	0	1	1	1	1
1	0	1	0	1	0	1	1	1	1	1	1	1	1	1	1	1	1	1	1	1	1	0	1	1	1	1	1	1	1	1	1	1	1	1	1	1	1	1	1	1	1	1	1	0	0	1	1	1	1
1	0	1	0	1	0	1	1	1	0	1	1	1	1	1	1	1	1	1	1	1	1	0	1	1	1	1	1	1	1	1	1	1	1	1	1	1	1	1	1	1	1	1	1	0	0	1	1	1	1
1	0	1	0	1	0	1	1	1	1	1	1	1	1	1	1	1	1	1	1	1	1	0	1	1	1	1	1	1	1	1	1	1	1	1	1	1	1	1	1	1	1	1	1	0	0	1	1	1	1
1	0	1	0	1	0	1	1	1	1	1	1	1	1	1	1	1	1	1	1	1	1	0	1	1	1	1	1	1	1	1	1	1	1	1	1	1	1	1	1	1	1	1	1	0	0	0	1	1	1
1	0	1	0	1	0	1	1	1	1	1	1	1	1	1	1	1	1	1	1	1	1	0	1	1	1	1	1	1	1	1	1	1	1	1	1	1	1	1	0	1	1	0	1	0	0	1	1	1	1
1	0	1	0	1	0	1	1	1	1	1	1	1	1	1	1	1	1	1	1	1	1	0	1	1	0	1	1	1	1	1	1	1	1	1	1	1	1	1	1	1	1	1	1	0	0	1	1	1	1
1	0	1	0	1	0	1	1	1	1	1	1	1	1	1	1	1	1	1	1	1	1	0	1	1	1	1	1	0	1	1	1	1	1	1	1	1	1	1	1	1	0	1	1	0	0	1	1	1	1
1	0	1	0	1	0	1	1	1	1	1	1	0	1	1	1	1	1	1	1	1	1	0	1	1	1	1	1	1	1	1	1	1	1	1	1	1	1	1	1	1	0	1	1	0	0	1	1	1	1
0	0	1	0	1	0	1	1	1	1	1	1	1	0	1	1	1	1	1	1	1	1	0	1	1	1	1	1	1	1	1	1	1	1	1	1	1	1	1	1	1	0	1	1	0	0	1	1	1	1
1	0	1	0	1	0	1	1	1	1	1	1	1	1	1	1	1	1	1	1	1	1	0	1	1	1	1	1	1	1	1	1	1	1	1	1	1	1	1	1	1	0	1	1	0	0	1	1	1	1
1	0	1	0	1	0	1	1	1	1	1	1	1	1	1	1	1	1	1	1	1	1	1	0	1	1	1	1	1	1	1	1	1	1	1	1	1	1	1	1	1	0	1	1	0	0	1	1	1	1
1	0	1	0	1	0	1	1	1	1	1	1	0	1	1	1	1	1	1	1	1	1	1	1	1	0	1	1	1	1	1	1	1	1	1	1	1	1	1	1	1	0	1	1	0	1	1	1	1	1
1	0	1	0	0	0	1	1	1	1	1	1	1	1	1	1	1	1	1	1	1	1	1	1	1	1	1	1	1	1	1	1	1	1	1	0	1	1	1	1	1	0	1	1	0	1	1	1	1	1
1	0	1	0	1	0	1	1	1	1	1	1	1	1	1	1	1	1	1	1	1	1	1	1	1	1	1	1	0	1	1	1	1	1	1	1	1	1	1	1	1	0	1	1	0	1	1	1	1	1
1	0	1	0	1	0	1	1	1	1	1	1	1	1	1	1	1	1	1	1	1	1	1	1	1	1	1	1	0	1	1	1	1	1	1	1	0	1	0	1	1	0	1	1	0	1	1	1	1	1
1	0	1	0	1	0	1	1	1	1	1	1	1	1	1	1	1	1	1	1	1	1	1	1	1	1	1	1	1	1	1	1	1	1	1	1	1	1	1	1	1	0	0	1	0	1	1	1	1	1
1	0	1	0	1	0	1	1	1	1	1	1	1	1	1	1	1	1	1	1	1	1	1	1	1	1	1	1	1	1	1	1	1	1	1	1	1	1	1	1	1	0	0	1	0	1	1	1	1	0
1	0	0	0	1	0	1	1	1	1	1	1	1	1	1	1	1	1	1	1	1	1	0	1	0	1	1	1	1	1	1	1	1	1	1	1	1	1	1	1	1	0	0	1	0	1	1	1	1	1
1	0	1	0	1	0	1	1	1	1	1	1	1	1	1	1	1	1	1	1	1	1	1	1	1	1	1	1	1	1	1	1	1	1	1	1	1	1	1	1	1	0	0	1	0	1	1	1	1	1
1	0	1	0	1	0	1	1	1	1	1	1	1	1	1	1	1	1	1	1	1	1	1	1	1	1	1	1	1	1	1	1	1	1	1	1	1	1	1	1	1	0	0	1	0	1	1	1	1	1
1	0	1	0	1	0	1	1	1	1	1	1	1	1	1	1	1	1	1	1	1	1	1	1	1	1	1	1	1	1	1	1	1	1	1	1	1	1	1	1	1	0	0	1	0	1	0	1	1	1
1	0	1	0	1	0	1	1	1	1	1	1	1	1	1	1	1	1	1	1	1	1	1	1	1	1	1	1	1	1	1	1	1	1	1	1	1	1	1	1	1	0	0	1	0	1	1	1	1	1
0	0	1	0	1	0	1	1	1	1	1	1	1	1	1	1	1	1	1	1	1	1	1	1	1	1	1	1	1	1	1	1	1	1	1	1	1	1	1	1	1	0	0	1	0	1	1	1	1	1
1	0	1	0	1	0	1	1	1	1	1	1	1	1	1	1	1	1	1	1	1	1	1	1	1	1	1	1	1	1	1	1	1	1	1	1	1	1	1	1	1	0	0	1	0	1	1	1	1	1
1	0	1	0	1	0	1	1	1	1	1	1	1	1	1	1	1	1	1	1	1	1	1	1	1	1	1	1	1	1	1	1	1	1	1	1	1	1	1	1	1	0	0	1	0	1	1	1	1	1
1	0	1	0	1	0	1	1	1	1	1	1	1	1	1	1	1	1	1	1	1	1	1	1	1	1	1	1	1	1	1	1	1	1	1	1	1	1	1	1	1	0	0	1	0	1	1	1	1	0
1	0	1	0	1	0	1	1	1	1	1	1	1	1	0	1	1	1	1	1	1	1	1	1	1	1	1	1	1	1	1	1	1	1	1	1	1	1	1	1	1	0	0	1	1	1	1	1	1	1
1	0	1	0	1	0	1	1	1	1	1	1	1	1	0	1	1	1	1	1	0	1	1	1	1	0	1	1	1	1	1	1	1	1	1	1	1	1	1	1	1	0	0	1	1	1	1	1	1	1
1	0	1	0	1	0	1	1	1	1	1	1	1	1	0	1	1	1	1	1	1	1	1	1	1	1	1	1	1	1	1	1	1	1	1	1	1	1	1	1	1	0	0	1	1	1	1	1	1	1
1	0	1	0	1	1	1	1	1	1	1	1	1	1	0	1	1	1	1	1	1	1	1	1	1	1	1	1	1	1	1	1	1	1	1	1	1	1	1	1	1	0	0	1	1	1	1	1	0	1
1	0	1	0	1	1	1	1	1	1	1	1	1	1	0	1	1	1	1	1	1	1	1	0	1	1	1	1	1	1	1	1	1	1	1	1	1	1	1	1	1	0	0	1	1	1	1	1	1	1
1	0	1	0	1	1	1	1	1	1	1	1	1	1	0	1	1	1	1	1	1	1	1	1	1	1	1	1	1	1	1	1	1	1	1	1	1	1	1	1	1	0	0	1	1	1	1	1	1	0
1	0	1	0	1	1	1	1	1	1	1	1	1	1	0	1	1	1	1	1	1	1	1	1	1	1	1	1	1	1	1	1	1	1	1	1	1	1	1	1	1	0	0	1	1	1	1	1	0	1
1	0	1	0	1	1	1	1	1	1	1	1	1	1	0	1	1	1	1	1	1	1	1	1	1	1	1	1	1	1	1	1	1	1	0	1	1	1	1	1	1	0	0	1	1	1	1	1	1	1
1	0	1	0	1	1	1	1	1	1	1	1	1	0	0	1	1	1	1	1	1	1	1	1	1	1	1	1	1	1	1	1	1	1	1	1	1	1	1	1	1	0	0	1	0	1	1	1	1	1
1	0	1	0	1	1	1	1	1	1	1	1	1	1	0	1	1	1	1	1	0	1	1	1	1	1	1	1	1	1	1	1	1	1	1	1	1	1	1	1	1	0	0	1	1	1	1	1	1	1
1	0	1	0	1	1	1	1	1	1	1	1	1	1	0	1	1	1	1	1	0	1	1	0	1	1	1	1	1	1	1	1	1	1	0	1	1	1	1	1	1	0	0	1	1	1	1	1	1	1
1	0	1	0	1	1	1	1	1	1	1	1	1	1	0	1	1	1	1	1	0	1	1	1	1	1	1	1	1	1	1	1	1	1	1	1	1	1	1	1	0	0	0	1	1	1	1	1	1	1
1	0	1	0	1	1	1	1	1	1	1	1	1	1	0	1	1	1	1	1	0	1	1	1	1	1	1	1	1	1	1	1	1	1	1	1	1	1	1	1	1	0	0	1	1	1	1	1	1	1
1	0	1	0	1	1	1	1	1	1	1	1	1	1	0	1	1	1	1	1	0	1	1	1	1	1	1	1	1	1	1	0	1	1	0	1	1	1	1	1	1	0	0	1	1	1	1	1	1	1
1	0	1	0	1	1	1	1	1	1	1	1	1	1	0	1	1	0	1	1	0	1	1	1	1	1	1	1	1	1	1	1	1	1	1	1	1	1	1	1	1	0	0	1	1	1	1	1	1	1
1	0	1	0	1	1	0	1	1	1	1	1	1	1	0	1	1	1	1	1	0	1	1	1	1	1	1	1	1	1	1	1	1	1	1	1	1	1	1	1	1	0	0	1	1	1	1	1	0	1
1	0	1	0	1	1	1	1	1	1	1	1	1	1	0	1	1	1	1	1	0	1	1	1	1	1	1	1	1	1	1	1	1	1	1	1	1	1	1	1	1	0	0	1	1	1	1	1	1	1
1	0	1	0	1	1	1	1	1	1	1	1	1	0	0	1	1	1	1	1	0	1	1	1	1	1	1	1	1	1	1	1	1	1	1	1	1	1	1	1	1	0	0	1	1	1	1	1	1	1
1	0	1	0	1	1	1	1	1	1	1	1	1	1	0	1	1	1	1	1	1	1	1	1	1	1	1	1	1	1	1	1	1	1	1	1	1	1	1	1	1	0	0	1	1	1	1	1	1	1
1	0	1	0	1	1	1	1	1	1	1	1	1	1	0	1	1	0	1	1	1	1	1	1	1	1	1	1	1	1	1	1	1	1	1	1	1	1	1	1	1	0	0	1	1	1	1	1	1	1
1	0	1	0	1	1	1	1	1	1	1	1	1	1	0	1	1	0	1	1	1	1	1	1	1	1	1	1	1	1	1	1	1	1	1	1	1	1	1	0	1	0	0	1	1	1	1	1	1	1
1	0	1	0	1	1	1	1	1	0	1	1	1	1	0	0	1	0	1	1	1	1	1	1	1	1	1	1	1	1	1	1	1	1	1	1	1	1	1	0	1	0	0	1	1	1	1	1	1	1
1	0	1	0	1	1	1	1	1	1	1	0	1	1	0	1	1	0	1	1	1	1	1	1	1	1	1	1	1	1	1	1	1	1	1	1	1	1	1	1	1	0	0	1	1	1	1	1	1	1
1	0	1	0	1	1	1	1	1	1	1	1	1	1	0	1	1	0	1	1	1	1	1	1	0	1	1	1	1	1	1	1	1	1	1	1	1	1	1	1	1	0	1	1	0	1	1	1	1	1
1	0	1	0	1	1	1	1	1	1	1	1	1	1	0	1	1	0	1	1	1	1	1	1	1	1	1	1	1	1	1	1	1	1	1	1	1	1	1	1	1	0	1	1	1	1	1	1	1	1
1	0	1	0	1	1	1	1	1	1	1	1	1	1	0	1	1	0	1	1	1	1	1	0	1	1	1	1	0	1	1	1	1	1	1	1	1	1	1	1	1	0	1	1	1	1	1	1	1	1
1	0	1	0	1	1	1	1	1	1	1	1	1	1	0	0	1	0	1	1	1	1	1	1	1	1	1	1	1	1	1	1	1	1	1	1	1	1	1	1	1	0	1	1	1	1	1	0	0	1
1	0	1	0	1	1	1	1	1	1	1	1	1	1	0	1	1	0	1	1	1	1	1	1	1	1	1	1	1	1	1	1	1	1	1	1	1	1	1	1	1	0	1	1	1	1	1	1	1	1
1	0	1	0	1	1	1	1	1	1	1	1	1	1	0	1	1	1	0	1	0	1	1	1	1	1	1	1	1	1	1	1	1	1	1	1	1	1	1	1	1	0	1	1	1	1	1	1	1	1
1	0	1	0	1	1	1	1	1	1	1	1	1	1	0	1	1	1	1	1	1	1	1	1	1	1	1	1	1	1	1	1	1	1	1	1	0	1	1	1	1	0	1	1	1	1	1	0	1	1
1	0	1	0	1	1	1	1	1	1	1	1	1	1	0	1	1	1	1	1	1	1	1	1	1	1	1	1	1	1	1	1	1	1	1	1	1	1	1	1	1	0	1	1	1	1	1	1	0	1
1	0	1	0	1	1	1	1	1	1	1	1	1	1	0	1	1	1	1	1	1	1	1	1	1	1	1	1	1	1	1	1	1	1	0	1	1	1	1	0	1	1	1	1	1	1	1	1	0	1
1	0	1	0	1	1	1	1	1	1	1	1	1	1	0	1	1	1	1	1	1	1	1	1	1	0	1	1	1	1	1	1	1	1	0	1	1	1	1	1	1	1	1	0	1	1	1	1	0	1
1	0	1	0	1	1	1	1	1	1	1	1	1	1	0	1	1	1	1	1	1	0	1	1	1	1	1	1	1	1	1	1	1	1	0	1	1	1	1	1	1	1	1	0	1	1	1	1	0	1
1	0	1	0	1	1	1	1	1	1	1	1	1	1	0	1	1	1	1	1	1	1	1	1	1	1	1	1	1	1	1	1	1	1	0	1	0	1	1	1	1	1	1	0	1	1	1	1	0	1
1	0	1	0	1	0	1	1	1	1	1	0	1	1	0	1	1	1	1	1	1	1	1	1	1	1	1	1	1	1	1	1	1	1	0	1	1	1	1	1	1	1	1	0	1	1	1	1	0	1
1	0	1	0	1	1	1	1	1	1	1	1	1	1	0	1	1	1	1	1	1	1	1	1	1	1	1	1	1	1	1	1	1	1	0	1	1	1	1	1	1	1	1	0	1	1	1	1	0	1
1	0	1	0	1	1	1	1	1	1	1	1	1	1	0	1	1	1	1	1	1	0	1	1	1	1	1	1	1	1	1	1	1	1	0	1	1	1	1	1	1	1	1	0	1	1	1	1	1	1
1	0	1	0	1	1	1	1	1	1	0	0	1	1	0	1	1	1	1	1	1	1	1	1	1	1	1	1	1	0	1	1	1	1	0	1	1	1	1	1	1	1	1	0	1	1	1	1	1	0
1	0	1	0	1	1	1	1	1	1	1	1	1	1	0	1	1	1	1	1	1	1	1	1	1	1	1	1	1	1	1	1	1	1	0	1	1	1	1	1	1	1	1	0	1	1	1	1	1	1
1	0	1	0	1	1	1	1	1	1	1	1	1	1	0	1	1	1	1	1	1	1	1	1	1	1	1	1	1	1	1	1	1	1	0	1	1	1	1	1	1	1	1	1	1	1	1	1	1	1
1	0	1	0	1	1	1	1	1	1	1	1	1	1	0	1	1	1	1	1	1	1	1	1	1	1	1	1	1	1	1	1	1	1	0	1	1	1	1	1	1	1	1	1	0	1	1	1	0	1
1	0	1	0	1	1	1	1	1	1	1	1	1	1	0	1	1	1	1	1	1	1	1	1	1	1	1	0	1	1	1	1	1	1	0	1	1	1	1	1	1	1	1	1	0	1	1	1	1	1
1	0	1	0	1	1	1	1	1	1	1	1	1	1	0	1	1	1	1	1	1	1	1	1	1	1	1	1	1	1	1	1	1	1	0	1	1	1	1	1	1	1	1	1	0	1	1	1	1	1
1	0	1	0	1	1	1	1	1	1	1	1	1	1	0	1	1	1	1	1	1	1	1	1	1	1	1	1	1	1	0	1	1	1	0	1	1	1	0	1	1	1	1	1	0	1	1	1	1	1
1	0	1	0	1	1	1	1	1	1	1	1	1	1	0	1	1	1	1	1	1	1	1	1	1	1	1	1	1	0	1	1	1	1	0	1	1	1	1	1	0	1	1	1	0	1	1	1	1	0
1	0	1	0	1	1	1	1	1	1	1	1	1	1	0	1	1	1	1	1	1	1	1	1	1	1	1	1	1	1	1	1	1	1	0	1	1	1	1	1	1	1	1	1	0	1	1	1	1	1
1	0	1	0	1	1	1	1	1	0	1	1	1	1	0	1	1	1	1	1	1	1	1	1	1	1	1	1	1	1	1	1	1	1	0	1	1	1	1	1	1	1	1	1	0	1	1	1	0	1
1	0	1	1	1	1	1	1	1	1	1	1	1	1	0	1	1	1	1	1	0	1	1	1	1	1	1	1	1	1	1	1	1	1	0	1	1	1	1	1	1	1	1	1	0	1	1	1	1	1
1	0	1	1	1	1	1	1	1	1	1	1	1	1	0	1	1	1	1	1	1	1	1	1	1	1	1	1	1	1	1	1	1	1	0	1	0	1	1	1	1	1	1	1	0	1	1	1	1	1
1	0	1	1	1	0	1	1	1	1	1	1	1	1	0	1	1	1	1	1	1	1	1	1	1	1	1	1	1	1	1	1	1	1	0	1	1	1	1	1	1	1	1	1	0	1	1	1	1	1
1	0	1	1	1	1	1	1	1	1	1	1	1	1	0	1	1	1	1	1	1	1	1	1	1	1	1	1	1	1	1	1	1	1	0	1	1	1	1	1	1	1	1	1	0	1	1	1	1	1
1	0	1	1	1	1	1	1	1	1	1	1	1	1	0	1	1	1	1	1	1	1	1	1	1	1	1	1	1	1	1	1	1	1	1	1	1	1	1	1	1	1	1	1	0	1	1	1	1	1
0	0	1	1	1	1	0	1	1	1	1	1	1	1	0	1	1	1	1	1	1	0	1	1	1	1	1	1	1	1	1	1	1	1	1	1	1	1	1	1	1	1	1	1	0	1	1	1	1	1
1	0	1	1	1	1	1	1	1	1	1	1	1	1	0	1	1	1	1	1	1	1	1	1	1	1	1	1	1	1	1	1	1	1	1	1	1	1	1	1	1	1	1	1	0	1	1	1	1	1
1	0	1	1	1	1	1	1	1	1	1	1	1	1	0	1	1	1	1	1	1	1	1	1	1	1	1	1	1	1	1	1	1	1	1	1	1	1	1	1	1	1	1	1	0	1	0	1	1	1
1	0	1	1	1	1	1	1	1	1	0	1	1	1	0	1	1	1	1	1	1	1	1	1	1	1	1	1	1	1	1	1	1	1	1	1	1	1	1	1	1	1	1	0	0	1	1	1	0	1
1	0	1	1	1	1	1	1	1	1	1	1	1	1	0	1	1	1	1	1	1	1	1	1	1	1	1	1	1	1	1	1	1	1	1	1	1	1	1	1	1	1	1	1	0	1	1	1	1	1
1	0	1	1	1	1	1	1	1	1	1	1	1	1	0	1	1	1	1	1	1	1	1	1	1	1	1	1	1	1	1	1	1	1	1	1	0	1	0	1	1	1	1	1	0	1	1	1	1	1
1	0	1	1	1	1	1	1	1	1	1	0	1	1	0	1	1	1	1	1	1	1	1	1	1	1	1	1	1	1	1	1	1	1	1	1	1	1	0	1	1	1	1	1	0	1	1	1	0	1
1	0	1	1	1	1	1	1	1	1	0	1	1	1	1	1	1	1	1	1	1	1	1	1	0	1	1	1	1	1	1	1	1	1	1	1	1	1	0	1	1	1	1	1	0	1	1	1	1	1
1	0	1	1	1	1	1	1	1	0	1	1	1	1	1	1	1	1	1	1	1	1	1	1	1	1	1	1	1	1	1	1	1	1	1	1	0	1	0	1	1	1	1	1	0	1	1	1	1	1
1	0	1	1	1	1	1	1	1	1	1	1	1	1	1	1	1	1	1	0	1	1	1	1	1	1	1	1	1	1	1	1	1	1	1	1	1	1	0	1	1	1	1	1	0	0	1	1	1	1
1	0	1	1	1	1	1	1	1	1	1	1	1	1	1	1	1	1	1	1	1	1	1	1	1	1	1	1	1	1	1	1	1	1	0	0	1	1	0	0	1	1	1	1	0	0	1	1	1	1
0	0	1	1	1	0	1	1	1	1	1	1	1	1	1	1	1	1	1	1	1	1	1	1	1	1	1	1	1	1	1	1	1	1	1	1	1	1	0	1	1	1	1	1	0	0	1	1	1	0
1	0	1	1	1	1	1	1	1	1	1	1	1	1	1	1	1	1	1	1	1	1	1	1	1	1	1	1	1	1	1	1	1	1	1	1	1	0	0	1	1	0	1	1	0	0	1	1	1	1
1	0	1	1	1	1	1	1	1	1	1	1	1	1	1	1	0	1	1	1	1	1	1	1	1	1	1	1	1	1	1	1	1	1	1	1	1	1	0	1	1	1	1	1	0	0	1	1	1	1
1	0	1	1	1	1	1	1	1	1	1	1	1	1	1	1	1	1	1	0	1	1	1	1	1	1	1	1	1	1	1	1	1	1	1	1	1	1	0	1	1	1	1	1	0	0	1	1	1	1
1	0	1	1	1	1	0	1	1	1	1	1	1	1	1	1	1	1	1	1	1	1	1	1	1	1	1	1	1	1	1	1	1	1	1	1	1	1	0	1	1	1	1	1	0	0	1	1	1	1
1	0	1	1	1	1	1	1	1	1	1	1	1	1	1	1	1	1	1	1	1	1	1	1	1	1	1	1	1	1	0	1	1	1	1	1	1	1	0	1	1	1	1	1	0	0	1	1	1	1
1	1	1	1	1	1	1	1	1	1	1	1	1	1	1	1	1	1	1	1	1	1	1	1	1	1	1	1	1	1	1	1	0	1	1	1	1	1	0	1	1	1	1	1	0	0	1	1	1	1
1	1	1	1	1	1	1	1	1	1	1	1	1	1	1	1	1	1	1	1	0	1	1	1	1	1	1	1	1	1	1	1	1	1	1	1	1	1	0	1	1	1	1	1	0	0	1	1	1	1
1	1	1	1	1	1	1	1	1	1	1	1	1	1	1	1	1	1	1	1	1	1	1	1	1	1	1	1	1	1	1	1	1	1	1	1	1	1	0	1	1	1	1	1	0	0	1	1	1	1
1	1	1	1	1	1	1	1	1	1	1	1	1	1	1	1	1	1	1	1	1	1	1	1	1	1	1	1	1	1	1	1	1	1	1	0	1	1	0	1	1	1	1	1	0	0	1	1	1	1
1	1	1	1	1	1	1	1	1	1	1	1	1	1	1	1	1	1	1	0	1	1	1	1	1	1	1	1	1	1	1	1	1	1	1	1	1	1	0	1	0	1	1	1	0	0	1	1	1	1
1	1	1	1	1	1	1	1	1	1	1	1	1	1	1	1	1	0	1	1	1	1	1	1	1	1	1	1	1	1	1	1	1	1	1	1	1	1	0	1	1	1	1	1	0	0	1	1	1	1
1	1	1	1	1	1	1	1	1	1	1	1	1	1	1	1	1	0	1	1	1	1	1	1	1	1	1	1	1	1	1	1	1	1	1	1	1	1	0	1	1	1	1	0	0	0	1	1	1	1
1	1	1	1	1	1	1	1	1	1	1	1	1	1	1	1	1	0	1	1	1	1	1	1	1	1	1	1	1	1	1	1	1	1	1	1	1	1	0	1	1	1	1	1	0	0	1	1	1	1
1	1	1	1	1	1	1	1	1	1	1	1	1	1	1	1	1	0	1	1	1	1	1	1	1	1	1	1	1	1	1	1	1	1	1	1	1	1	0	1	1	1	1	1	0	0	1	1	1	1
1	1	1	1	1	1	1	1	1	1	1	1	1	1	1	1	1	0	1	1	1	1	1	1	1	1	1	1	1	1	1	1	0	1	1	1	1	1	0	1	1	1	1	1	0	0	1	1	1	1
1	1	1	1	1	1	1	1	1	1	1	1	1	1	1	1	1	0	1	1	1	1	1	1	1	1	1	1	1	1	1	1	1	1	0	1	1	0	0	1	1	1	1	1	0	0	1	1	1	1
1	1	1	1	1	1	1	1	1	1	1	1	1	1	1	1	1	0	1	1	1	1	1	1	1	1	1	1	1	1	0	1	1	1	1	1	1	1	0	1	1	1	1	1	0	0	1	1	1	1
1	1	1	1	1	1	0	1	1	1	1	1	1	1	1	1	1	0	1	1	1	1	1	1	1	1	1	1	1	1	1	1	1	1	1	1	0	1	0	1	0	1	1	1	0	0	1	1	1	1
1	1	1	1	1	1	1	1	1	1	1	1	1	1	1	1	1	0	1	1	1	1	1	1	1	1	1	1	1	1	1	1	1	1	1	1	1	1	0	1	0	1	1	1	0	0	1	1	1	1
1	1	1	1	1	1	1	1	1	1	1	1	1	1	1	1	1	0	1	0	1	1	1	1	1	1	1	1	1	1	1	1	1	1	1	1	1	1	0	1	0	1	1	1	0	0	1	1	1	1
1	1	1	1	1	1	1	1	1	1	1	1	1	1	1	1	1	0	1	1	0	1	1	1	1	1	1	1	1	1	1	1	1	1	1	0	1	1	0	1	0	1	1	1	0	0	1	1	1	1
1	1	1	1	1	1	0	1	1	1	1	1	1	1	1	1	1	0	1	1	1	1	1	1	1	1	1	0	1	1	1	1	1	1	1	1	1	1	0	1	0	1	1	0	0	0	1	1	1	0
1	1	1	1	1	1	1	1	1	1	1	1	1	1	1	1	1	0	1	1	1	1	1	1	1	1	1	1	1	1	1	1	1	0	1	1	1	1	0	1	0	1	1	1	0	0	1	1	1	1
1	1	1	1	1	1	1	1	1	1	1	1	1	1	1	1	1	0	1	1	1	1	1	1	1	1	1	1	1	1	1	1	1	1	1	0	1	1	0	1	0	1	1	1	0	0	1	1	1	1
1	1	1	1	1	1	1	1	1	1	1	1	1	1	1	1	1	0	1	1	1	1	1	1	1	1	1	1	1	1	1	1	1	1	1	1	1	1	0	1	0	1	1	1	0	0	1	1	1	1
1	1	1	1	1	1	1	1	1	1	1	1	1	1	1	1	0	0	1	1	1	1	1	1	1	1	1	1	1	1	1	1	1	1	1	1	1	0	0	1	0	1	1	1	0	0	1	1	1	1
1	1	1	1	1	1	1	1	1	1	1	1	1	1	1	1	1	0	1	1	1	1	1	1	1	1	1	1	1	1	1	1	1	1	1	1	1	1	0	1	0	1	1	1	0	0	1	0	1	1
1	1	1	1	1	1	1	1	1	1	1	1	1	1	1	1	1	0	1	1	1	1	1	1	1	1	1	1	1	1	0	1	1	1	1	1	1	1	0	1	0	1	1	1	0	0	1	1	1	0
1	1	1	1	1	1	1	1	1	1	1	1	1	1	1	1	1	0	1	1	1	1	1	1	1	1	1	1	1	1	0	1	1	1	1	1	1	0	1	1	0	1	1	1	0	0	1	1	1	1
1	1	1	1	1	1	1	1	1	1	1	1	1	1	1	1	1	0	1	1	0	1	1	1	1	1	1	1	1	1	0	1	1	1	1	1	1	1	1	1	0	1	1	1	0	0	1	1	1	1
1	1	1	1	1	1	1	1	1	1	1	1	1	1	1	1	1	0	1	1	0	1	1	1	1	1	1	1	0	1	0	1	1	1	1	1	1	1	1	1	0	1	1	1	0	0	1	0	1	1
1	1	1	1	1	1	1	1	1	1	1	1	1	1	1	1	1	0	1	1	1	1	1	1	1	1	1	1	0	1	0	1	1	1	1	1	1	1	1	1	0	1	1	1	0	0	1	0	1	1
1	0	1	1	1	1	1	1	1	1	1	1	1	1	1	1	1	0	1	1	1	1	1	1	1	1	1	1	0	1	0	1	1	1	1	1	1	1	0	1	0	1	1	1	0	0	1	0	1	1
1	1	1	1	1	1	1	1	1	1	1	1	1	1	1	1	1	0	1	1	1	1	1	1	1	1	1	1	0	1	0	1	1	1	1	1	1	1	1	1	0	1	1	1	0	1	1	0	1	1
1	1	1	1	1	1	1	1	1	1	1	1	1	1	1	1	1	0	1	1	1	1	1	1	1	1	1	1	0	1	0	1	0	1	1	1	1	1	1	1	0	1	1	1	0	1	1	0	1	1
1	1	1	1	1	1	1	1	1	1	1	1	1	1	1	1	1	0	1	1	1	1	1	1	1	1	1	1	0	1	0	1	0	1	1	1	1	1	1	1	0	1	1	1	0	1	1	0	1	1
1	1	1	1	1	1	1	1	1	1	1	1	0	1	1	1	1	0	1	1	1	1	1	1	1	1	1	1	0	1	0	1	0	1	1	1	1	1	0	1	0	1	1	1	0	1	1	0	1	1
1	1	1	1	1	1	1	1	1	1	1	1	1	1	1	1	1	0	1	1	1	1	1	1	1	1	1	1	0	1	0	1	0	1	1	1	1	1	1	1	0	1	1	1	0	1	1	0	1	1
1	1	1	1	1	1	1	1	1	1	1	1	1	1	1	1	1	0	1	1	1	1	0	1	1	1	1	1	0	1	0	1	0	1	1	1	1	1	1	1	0	1	1	1	0	1	1	0	1	1
1	1	1	1	1	1	1	1	1	1	1	1	1	1	1	1	1	0	1	1	1	1	0	1	1	1	1	1	0	1	0	1	0	1	1	1	1	0	1	1	0	1	1	1	0	1	1	0	1	0
1	1	1	1	1	1	1	1	1	1	1	1	1	1	1	1	1	0	1	1	1	1	0	1	1	1	1	1	0	1	0	1	0	1	1	1	1	1	1	1	0	1	1	1	0	1	1	0	1	1
1	1	1	1	1	1	1	1	1	1	1	1	1	1	1	1	1	0	1	1	1	1	0	1	1	1	1	1	0	1	0	1	0	1	1	1	1	1	1	1	0	1	1	1	0	1	1	0	1	1
1	1	1	1	1	1	1	1	1	1	1	1	1	1	1	1	1	0	1	1	0	1	0	1	1	1	1	1	0	1	0	1	0	1	1	1	1	1	1	1	0	1	1	1	0	1	1	0	1	1
1	1	1	1	1	1	1	1	1	1	1	1	1	1	1	1	1	0	1	1	1	1	0	1	1	1	1	1	0	1	0	1	0	1	1	1	1	1	0	1	0	1	1	1	0	1	1	0	1	1
1	1	1	1	1	1	1	1	1	1	1	1	1	1	1	1	1	0	1	1	1	1	0	1	0	1	1	1	0	1	0	1	0	1	1	1	1	1	1	1	0	1	1	1	0	1	1	0	1	1
1	1	1	1	1	1	1	1	1	1	1	1	1	1	1	1	1	0	1	1	1	1	0	1	1	1	1	1	0	1	0	1	0	1	1	1	1	1	1	1	0	1	1	1	0	1	1	0	1	1
1	1	1	1	1	1	1	1	1	1	1	1	1	1	1	1	0	0	1	1	0	1	0	1	1	1	1	1	0	1	0	1	0	1	1	1	1	1	1	1	0	1	1	1	0	1	1	1	1	1
1	1	1	0	1	1	1	1	1	1	1	1	1	1	1	1	1	1	1	1	1	1	0	1	0	1	1	1	0	1	0	1	0	1	1	1	1	1	1	1	0	1	1	1	0	1	1	1	1	1
1	1	1	1	1	1	1	1	1	1	1	1	1	1	1	1	1	1	1	1	1	1	0	1	1	1	0	1	0	1	0	1	0	1	1	1	1	1	1	1	0	1	1	1	0	1	1	1	1	1
1	1	1	1	1	1	1	1	1	1	1	1	1	1	1	1	1	1	1	1	1	1	0	1	1	1	1	1	0	1	0	1	0	1	0	1	1	1	1	1	0	0	1	1	0	1	1	1	1	1
1	1	1	1	1	1	1	1	0	1	1	1	1	1	1	1	1	1	1	1	1	1	0	1	1	1	1	1	0	1	0	1	0	1	1	1	1	1	1	1	0	1	1	0	0	0	1	1	1	1
1	1	1	1	1	1	1	1	1	1	1	1	1	1	1	1	1	1	1	1	1	1	0	1	1	1	1	1	0	1	0	1	0	1	1	1	1	0	1	1	0	1	1	1	0	1	1	1	1	1
1	1	1	1	1	1	1	1	1	1	1	1	1	0	1	1	1	1	1	1	1	1	0	1	1	1	1	1	0	1	0	1	1	1	1	1	1	1	1	1	0	1	1	1	0	1	1	1	1	1
1	1	1	1	1	1	1	1	1	1	1	1	1	1	1	1	1	1	1	1	1	1	0	1	1	1	1	1	0	1	0	1	1	1	1	1	1	1	1	1	0	1	0	1	0	1	1	1	1	1
1	1	1	1	1	1	1	1	1	1	1	1	1	1	1	1	1	1	1	1	1	1	0	1	1	1	1	1	0	1	0	1	1	1	1	1	1	1	1	1	0	1	1	1	0	1	1	1	1	1
1	1	0	1	1	1	1	1	1	1	1	1	1	1	1	1	1	1	1	1	1	1	0	1	1	1	1	1	0	1	0	1	1	1	1	1	1	1	1	1	0	1	1	1	0	1	1	1	1	1
1	1	1	1	1	1	1	1	1	1	1	1	1	1	1	1	1	1	1	1	1	1	0	1	0	1	1	1	0	1	0	1	1	1	1	1	1	1	1	1	0	1	1	1	0	1	1	1	1	1
1	1	1	1	1	1	1	1	1	1	1	1	1	1	1	1	1	1	1	1	1	1	0	1	1	1	1	1	0	1	0	1	1	1	1	1	1	1	1	1	0	1	1	1	1	1	1	1	1	1
1	1	1	1	1	1	1	1	1	1	1	1	1	1	1	1	1	1	1	1	1	1	0	1	1	1	1	1	0	1	0	1	1	1	1	0	1	1	1	1	0	1	1	1	1	1	1	1	1	1
1	1	1	1	1	1	1	1	1	1	1	1	1	1	0	1	1	1	1	1	1	0	0	1	1	1	1	1	0	1	0	1	1	1	1	1	1	1	1	1	0	1	1	1	1	1	1	1	1	1
1	1	1	1	1	1	1	1	1	0	1	1	1	1	1	1	1	1	1	1	1	1	0	1	1	1	1	1	0	1	0	1	1	1	1	1	1	1	1	1	0	1	1	1	1	1	1	1	1	1
1	1	1	1	1	1	1	1	1	1	1	1	1	1	1	1	1	1	1	1	1	1	0	1	0	1	1	1	0	1	0	1	1	1	1	1	1	1	1	1	0	1	1	1	1	1	1	1	1	1
1	1	1	1	1	1	1	1	1	1	1	1	1	1	1	1	1	1	1	1	1	1	0	1	1	1	1	1	0	1	0	1	1	1	1	1	1	1	1	1	0	1	1	1	1	0	1	1	1	1
1	1	1	1	1	1	1	1	1	1	1	0	1	1	1	1	1	1	1	1	1	1	0	1	1	1	1	1	0	1	0	1	1	1	1	1	1	1	1	1	0	1	1	0	1	1	1	1	1	1
1	1	1	1	1	1	1	1	1	1	1	1	1	1	1	1	1	1	1	1	0	1	0	1	1	1	1	1	0	1	0	1	1	1	0	1	1	1	1	1	0	1	1	1	1	1	1	1	1	1
1	1	1	1	1	1	1	1	1	1	1	1	1	1	1	1	0	1	1	1	1	1	0	1	0	1	1	1	0	1	0	1	1	1	1	1	1	1	1	1	0	1	1	1	1	1	1	1	1	1
1	1	1	1	1	1	1	1	1	1	1	1	1	1	1	1	1	1	1	1	1	1	0	1	0	1	1	1	0	1	0	1	1	1	1	1	1	1	1	1	0	1	1	1	1	1	1	1	0	1
1	1	1	1	1	1	1	1	1	1	1	1	0	1	1	1	1	1	1	1	1	1	0	1	0	1	1	1	0	0	0	1	1	1	1	1	1	0	1	1	0	1	1	1	1	1	1	1	1	1
1	1	1	1	1	1	1	1	1	1	1	1	1	1	1	1	1	1	1	1	1	1	0	1	0	1	1	1	0	1	0	1	0	1	0	1	1	1	1	0	0	1	1	1	1	1	1	1	1	1
1	1	1	1	1	1	1	1	1	1	1	1	1	1	1	1	1	1	1	1	1	0	0	1	0	1	1	1	0	1	0	1	1	1	1	1	1	1	1	1	0	1	1	1	1	1	1	1	1	1
1	1	1	1	1	1	1	1	1	1	1	1	1	0	1	1	1	1	1	1	1	1	0	1	0	1	1	1	0	1	0	1	1	1	1	1	1	1	1	1	0	1	1	1	1	1	1	1	1	1
1	1	1	1	1	1	1	1	1	1	1	1	1	1	1	1	1	1	1	1	1	1	0	1	0	1	1	1	0	1	0	1	0	1	1	1	1	1	1	1	0	1	1	1	1	1	1	1	1	1
1	1	1	1	1	1	1	1	1	1	1	1	1	1	1	1	1	1	1	1	1	1	0	1	0	1	1	1	0	1	0	1	1	1	1	1	1	1	1	1	0	1	1	1	1	1	1	1	1	1
1	1	1	1	1	1	1	1	1	1	1	1	1	1	1	1	1	1	0	1	1	1	0	1	0	1	1	1	0	1	0	1	1	1	1	1	1	1	1	1	0	1	1	1	1	1	1	1	1	1
1	1	1	1	1	1	1	1	1	0	1	1	1	1	1	1	1	1	1	1	1	1	0	1	0	1	1	1	1	1	0	1	1	1	1	1	1	1	1	1	0	1	1	1	0	1	1	1	1	1
1	1	1	1	1	1	1	1	1	1	1	1	1	1	1	1	1	1	1	1	1	1	0	1	0	1	1	1	1	1	0	1	1	1	1	1	1	0	1	1	0	1	1	1	1	1	1	1	1	1
1	1	1	1	1	1	1	1	1	1	1	1	1	1	1	1	1	1	1	1	1	1	0	1	0	1	1	1	1	1	0	1	1	1	1	1	1	1	1	1	0	1	1	0	1	1	1	1	1	1
1	1	1	1	1	1	1	1	1	1	1	1	1	1	1	1	1	1	1	1	1	1	0	1	0	1	1	0	1	1	0	1	1	1	1	1	1	1	1	1	0	1	1	0	1	1	1	1	1	1
1	1	0	1	1	1	1	1	1	1	1	1	1	0	1	1	1	1	1	1	1	1	0	1	0	1	1	1	1	1	0	1	1	1	1	1	1	1	1	1	0	1	1	0	0	1	1	1	1	1
1	1	1	1	1	0	1	1	1	1	1	1	1	1	1	1	1	1	1	1	1	1	0	1	0	1	1	1	1	1	0	1	1	1	1	1	1	1	1	1	0	1	0	0	1	1	1	1	1	1
1	1	1	1	1	0	1	1	1	1	1	1	1	1	1	1	1	1	1	1	1	1	0	1	0	1	1	1	1	1	0	1	1	1	1	1	1	1	1	1	1	1	1	0	1	1	1	1	1	1
1	1	1	1	1	0	1	1	1	1	1	1	1	1	1	1	1	1	1	1	1	1	0	1	0	1	1	1	1	1	0	1	1	1	1	1	1	1	1	0	1	1	1	0	1	0	1	1	1	1
1	1	1	1	1	0	1	1	1	1	1	1	1	1	1	1	1	1	1	1	1	1	0	1	0	1	1	1	1	1	0	1	1	1	1	1	1	1	1	1	1	1	0	1	1	1	1	1	1	1
1	1	1	1	1	0	1	1	1	1	1	1	1	1	1	1	1	1	1	1	1	1	0	1	0	1	1	1	1	1	0	1	1	1	1	1	1	1	1	1	1	1	1	1	1	1	1	1	1	1
1	1	1	1	1	0	1	1	1	1	1	1	1	1	1	1	1	1	1	1	1	1	0	1	0	1	1	1	1	1	0	1	1	1	1	1	1	1	1	1	1	1	1	1	1	1	0	1	1	1
1	1	1	1	1	0	1	1	1	1	1	1	1	1	1	1	1	1	1	1	1	1	0	1	0	1	1	1	1	1	0	1	1	1	1	1	1	1	0	1	1	1	1	1	1	1	1	1	1	1
1	1	1	1	1	0	1	1	1	1	1	1	1	1	1	1	1	1	1	1	1	1	0	1	1	1	1	1	1	1	0	1	1	1	1	1	1	1	1	1	1	1	1	1	1	1	1	1	1	1
1	1	1	1	1	0	1	1	1	1	1	1	1	1	1	1	1	1	1	1	1	0	0	1	1	1	1	1	0	1	0	1	1	1	1	1	1	1	1	1	1	1	1	1	1	1	1	1	1	1
1	1	0	1	1	0	1	1	1	1	1	1	1	1	1	1	1	1	1	1	1	1	0	1	1	1	1	1	1	1	0	1	1	1	1	1	1	1	1	1	1	1	1	1	1	0	1	1	1	0
1	1	1	1	1	0	1	1	1	1	1	1	1	1	1	1	1	1	1	1	1	1	0	1	1	1	1	1	1	1	0	1	1	1	1	1	1	1	1	1	1	1	1	1	1	1	1	1	1	1
1	1	1	1	1	0	1	1	1	1	1	1	1	1	0	1	1	1	1	1	1	1	0	1	1	1	1	1	1	1	0	1	1	1	1	1	1	1	1	0	1	1	0	1	1	1	1	1	1	1
1	0	1	1	1	0	1	1	1	1	1	1	1	1	1	1	1	1	1	1	1	1	0	1	1	1	1	1	1	1	1	1	0	1	1	1	1	1	1	1	1	1	1	1	1	1	1	1	1	1
1	1	1	1	1	0	1	1	1	1	1	1	1	1	1	1	1	1	1	1	0	1	0	1	0	1	1	1	1	1	1	1	1	1	1	1	1	1	1	1	1	0	1	1	1	1	1	1	1	1
1	1	1	1	1	0	1	1	1	1	1	1	1	1	1	1	1	1	1	1	1	1	0	1	1	1	1	1	1	1	1	1	1	1	1	1	1	1	1	1	1	1	1	1	1	1	1	1	1	1
1	1	1	1	1	0	1	1	1	1	1	1	1	1	1	1	1	1	1	1	1	1	0	1	1	1	1	1	1	1	1	1	1	1	1	1	1	1	1	1	1	1	1	1	1	1	1	0	1	1
1	1	1	1	1	0	1	1	1	1	1	1	1	1	1	1	1	1	1	1	1	1	0	1	1	1	1	1	1	1	1	1	1	1	1	1	1	1	1	1	1	1	1	1	1	1	1	1	1	1
1	1	1	1	1	0	1	1	1	1	1	1	1	1	1	1	1	1	1	1	1	1	0	1	1	1	1	1	1	1	1	1	1	1	1	1	1	1	1	1	1	1	1	1	1	1	1	1	1	1
1	1	1	1	1	0	1	1	1	1	1	1	1	1	0	1	1	1	1	1	1	1	0	1	1	1	1	1	1	1	1	1	1	1	1	1	1	1	1	1	1	1	1	1	1	1	1	1	1	1
1	1	1	1	1	0	1	1	1	1	1	1	1	1	1	1	1	1	1	1	1	1	0	1	1	1	1	1	1	1	1	1	1	1	1	1	1	1	1	1	1	1	1	1	1	1	1	0	1	1
1	1	1	1	1	0	1	1	1	1	1	1	0	1	1	1	1	1	1	1	1	1	0	1	1	1	1	1	1	1	1	1	1	1	1	1	1	0	1	1	1	1	0	1	1	1	1	1	1	1
1	1	1	1	1	0	1	1	1	1	0	1	1	1	1	1	1	1	1	1	0	1	0	1	1	1	1	1	1	1	1	1	1	1	1	1	1	1	1	1	1	1	0	1	1	1	1	1	1	1
1	1	1	1	1	0	1	1	1	1	1	1	1	1	1	1	1	1	1	1	1	1	0	1	0	1	1	1	1	1	1	1	1	1	1	1	1	1	1	1	1	1	0	1	1	1	1	1	1	0
1	1	1	1	1	0	1	1	1	0	1	1	1	1	1	1	1	1	1	1	1	1	0	1	1	1	1	1	0	1	1	1	1	1	1	1	1	1	1	1	1	1	0	0	1	1	1	1	1	1
1	1	1	1	1	0	1	1	1	1	1	1	1	1	1	1	1	0	1	1	1	1	0	1	1	1	1	1	1	1	1	1	1	1	1	1	1	1	1	1	1	1	0	1	1	1	1	1	1	1
1	1	1	1	1	0	1	1	1	1	1	1	1	1	1	1	1	0	1	1	1	1	0	1	1	1	1	1	1	1	1	1	1	1	1	1	1	1	1	1	1	1	0	1	1	1	1	1	1	1
1	1	1	1	0	0	1	1	1	1	1	1	1	1	1	1	1	0	1	1	1	1	0	1	1	1	1	1	1	1	1	1	1	1	1	1	1	1	1	1	1	1	0	1	1	1	0	1	1	1
1	1	1	1	1	0	1	1	1	1	1	1	1	1	1	1	1	0	1	1	1	1	0	1	1	1	1	1	1	1	1	1	1	1	1	1	1	1	1	1	1	1	0	1	1	1	1	1	1	1
1	1	1	1	1	0	1	1	1	1	1	1	1	1	1	1	1	0	1	1	1	1	0	1	1	1	1	1	1	1	1	1	0	1	1	1	1	1	1	1	1	1	0	1	1	1	1	1	1	1
1	1	1	1	1	0	1	1	1	1	1	1	1	1	1	1	1	0	1	1	1	1	0	1	1	1	1	1	1	1	1	1	1	1	1	1	1	1	1	1	1	1	0	1	1	1	1	1	1	1
1	1	1	1	1	0	1	1	1	1	1	1	1	1	1	1	1	1	1	1	1	1	0	1	1	1	1	1	1	1	1	1	1	1	1	1	1	1	1	1	1	1	0	1	1	1	1	1	1	1
1	1	1	1	1	0	1	1	1	1	1	1	1	1	1	1	1	1	1	1	1	0	0	1	1	1	1	1	1	1	1	1	1	1	1	1	1	1	1	1	1	1	0	1	1	1	1	1	1	0
1	1	1	1	1	0	1	1	1	1	1	1	1	1	1	1	1	1	1	1	1	1	0	1	1	1	1	1	1	1	1	1	1	1	1	1	1	1	1	1	1	1	0	1	1	1	1	1	1	1
1	1	1	1	1	0	1	1	1	1	1	0	1	1	1	1	1	1	1	1	1	1	0	1	1	1	1	1	1	1	1	1	1	1	1	1	1	1	1	1	1	1	0	1	1	1	1	1	1	1
1	1	1	1	1	0	1	1	1	1	1	1	1	1	1	1	1	1	1	1	0	1	0	1	1	1	1	1	1	1	1	1	1	1	1	1	1	1	1	1	1	1	0	1	0	1	1	1	1	1
1	1	1	1	1	0	1	1	1	1	1	1	1	1	1	1	1	1	1	1	1	1	0	1	1	1	1	1	1	1	1	1	1	1	1	1	1	1	1	1	1	1	0	1	1	1	1	1	1	0
1	1	1	1	1	0	1	1	1	1	1	1	1	1	1	1	1	1	1	1	1	1	0	1	1	1	1	1	1	1	1	1	1	1	1	1	1	1	1	1	1	1	0	1	1	1	1	1	1	1
1	1	1	1	0	0	1	1	1	1	1	0	1	1	0	1	1	1	1	1	1	1	0	1	1	0	1	1	1	1	1	1	1	1	1	1	1	1	1	1	1	1	0	1	1	1	1	1	1	1
1	1	1	1	1	0	1	1	1	1	1	1	1	1	1	1	1	1	1	1	1	1	0	1	1	1	1	1	1	1	1	1	1	1	1	1	1	1	1	1	1	1	0	1	1	1	1	1	1	1
1	1	1	1	1	0	1	1	1	1	1	1	1	1	1	1	1	1	1	1	1	1	0	1	1	1	1	1	1	1	1	1	1	1	1	1	1	1	1	1	1	0	0	1	1	1	1	1	1	1
1	1	1	1	1	0	1	1	1	0	1	1	1	1	1	1	1	1	1	1	1	1	0	1	1	1	1	1	1	1	1	1	1	1	1	1	1	1	1	1	1	0	0	1	1	1	1	1	1	0
0	1	1	1	1	0	1	1	1	0	1	1	1	1	0	1	1	1	1	1	1	1	0	1	1	1	1	1	1	1	1	1	1	1	1	1	1	1	1	1	1	0	0	1	1	1	1	0	1	1
1	1	1	1	1	0	1	1	1	0	1	1	1	1	1	1	1	1	1	1	1	1	0	1	1	1	1	1	1	1	1	1	1	1	1	1	1	1	1	1	1	0	0	1	1	1	1	1	1	1
1	1	1	1	1	0	1	1	1	0	1	1	1	1	1	1	1	1	1	1	1	1	0	1	1	1	1	1	1	1	1	1	1	1	1	1	1	1	1	1	1	0	0	1	1	1	1	1	1	1
1	1	1	1	1	0	1	1	1	0	1	1	1	1	1	1	1	1	1	1	1	1	0	0	1	1	1	0	1	1	1	1	1	1	1	1	1	1	1	1	1	0	0	1	1	1	1	1	1	1
1	1	1	1	1	0	1	1	1	0	1	0	1	1	1	1	1	1	1	1	1	1	0	1	1	1	1	1	1	1	1	1	1	1	1	1	0	1	1	1	1	0	0	1	1	1	1	1	1	1
1	1	1	1	1	0	1	1	1	0	1	1	1	1	1	1	1	1	1	1	1	1	0	1	1	1	1	1	1	1	1	1	1	1	1	1	0	1	1	1	1	0	0	1	1	1	1	0	1	1
1	1	1	1	1	0	1	1	1	0	1	1	1	1	1	1	1	1	1	1	1	1	0	1	1	1	1	1	1	1	1	1	1	1	1	1	1	1	1	1	1	1	0	1	1	1	1	1	1	0
1	1	1	1	1	0	1	1	1	0	1	1	1	1	1	1	1	1	1	1	1	1	0	1	1	1	1	1	1	1	1	1	1	1	1	1	1	1	1	1	1	1	0	1	1	1	1	1	1	1
1	0	1	1	1	0	1	1	1	1	1	1	1	1	1	0	1	1	1	1	1	1	0	1	1	1	1	1	1	1	1	1	1	1	1	1	1	1	1	1	1	1	0	1	1	1	1	1	1	1
1	1	1	1	1	0	1	1	1	1	1	1	1	1	1	1	1	1	1	1	1	1	0	1	1	1	1	1	1	1	1	1	1	1	1	1	1	1	1	1	1	1	0	1	1	1	1	1	1	1
1	1	1	1	1	0	1	1	1	1	1	1	1	1	1	1	1	1	0	1	1	1	0	1	1	1	1	1	0	1	1	1	1	1	1	1	1	1	1	1	1	1	0	1	1	1	1	1	1	1
1	1	1	1	1	0	1	1	1	1	1	1	1	1	1	1	1	1	1	1	1	0	0	1	1	1	1	1	1	1	1	1	1	1	1	1	1	1	1	1	1	1	0	1	1	1	1	0	1	1
1	1	1	1	1	0	1	1	1	1	1	1	1	1	1	1	1	1	1	1	1	1	0	1	1	1	1	1	1	1	1	1	1	1	1	1	1	1	1	1	1	1	0	1	1	1	1	1	1	1
1	1	1	1	1	0	1	1	1	1	0	1	1	1	1	1	1	1	1	1	1	1	0	1	1	1	1	1	0	1	1	1	1	1	1	1	1	1	1	1	1	1	0	1	1	1	1	1	1	1
1	1	1	1	1	0	1	1	1	1	0	1	1	1	1	1	1	1	1	1	1	1	0	1	1	1	1	1	1	1	1	1	1	1	1	1	1	1	1	1	1	1	0	1	1	1	1	1	1	1
1	1	1	1	1	0	1	1	1	1	0	1	1	1	1	1	1	1	1	1	1	0	0	1	1	1	1	1	1	1	1	1	1	1	1	1	1	1	1	1	1	1	0	1	1	1	1	1	0	1
1	1	1	1	1	0	1	1	1	0	0	1	1	1	1	1	1	1	1	1	1	1	0	1	1	1	1	1	1	1	1	1	1	1	1	1	1	1	1	1	1	1	0	1	1	0	1	1	1	1
1	1	1	1	1	0	1	1	1	1	1	1	1	1	1	1	1	1	1	1	1	1	0	0	1	1	1	1	1	1	1	1	1	1	1	1	1	1	1	1	1	1	0	1	1	1	1	1	1	1
1	1	1	0	1	0	1	1	1	1	1	1	1	1	1	1	1	1	1	1	1	1	0	1	1	1	1	1	1	1	1	1	1	1	1	1	0	1	1	1	1	1	0	1	1	1	1	1	1	1
1	1	1	1	1	0	1	1	1	1	1	1	1	1	1	1	1	1	1	1	1	1	0	1	1	1	1	1	1	1	1	1	1	1	1	1	1	1	1	1	1	1	0	1	1	1	1	1	1	1
1	1	1	1	1	0	1	1	1	1	1	1	1	1	1	1	1	1	1	1	1	1	0	1	1	1	1	1	1	1	1	1	1	1	1	1	1	1	1	1	1	1	0	1	1	1	1	1	1	1
1	1	1	0	1	0	1	1	1	1	1	1	1	1	1	1	1	1	1	1	1	1	0	1	1	1	1	1	1	1	1	1	1	1	1	1	1	1	1	1	1	1	1	1	1	1	1	1	1	1
1	1	1	0	1	0	1	0	1	1	1	1	1	1	1	1	1	1	1	1	1	1	0	1	1	1	1	0	1	1	1	1	1	1	1	1	1	1	1	1	1	0	1	1	1	1	1	1	1	1
1	1	1	0	1	0	1	1	1	1	1	1	1	1	1	1	1	1	1	1	1	1	0	1	1	1	1	1	1	1	1	1	1	1	1	1	1	1	1	1	1	1	1	1	1	1	1	1	1	1
1	1	1	0	1	0	1	1	1	1	0	1	1	1	1	1	1	1	1	1	1	1	0	1	1	1	1	1	1	1	1	1	1	1	1	1	1	1	1	1	1	1	1	1	1	1	1	0	1	1
1	1	1	0	1	0	1	1	1	1	1	1	1	1	1	1	1	1	1	1	1	1	0	1	1	1	1	1	1	1	1	1	1	1	1	1	1	1	1	1	1	1	1	1	1	1	1	1	1	1
1	1	1	0	1	0	1	1	1	1	1	1	1	1	1	1	1	1	1	1	1	1	0	1	1	1	1	1	1	1	0	1	1	1	1	1	1	1	1	1	1	1	1	1	1	1	1	1	1	1
1	1	1	0	1	0	1	1	1	1	1	1	1	1	1	1	1	1	1	1	1	1	0	1	1	1	1	1	1	1	1	1	1	1	1	1	1	1	1	1	1	1	1	1	1	1	1	1	1	1
1	1	1	0	1	0	1	1	1	1	1	1	1	1	1	1	1	1	1	1	1	1	0	1	1	1	1	1	1	1	1	1	1	0	1	1	1	1	1	1	1	1	1	1	1	1	1	1	1	1
1	1	1	0	1	0	1	1	1	1	1	1	1	1	1	1	1	1	1	1	1	0	0	1	1	1	1	1	1	1	1	1	1	1	1	1	1	1	1	1	1	1	1	1	1	1	1	1	1	1
1	1	1	0	1	0	1	1	1	1	1	1	1	1	1	1	1	1	1	1	1	1	0	1	1	1	1	1	1	1	1	1	1	1	1	1	1	1	1	1	1	1	1	0	1	1	1	1	1	1
1	1	1	0	1	0	1	1	1	1	1	1	1	1	1	1	1	1	1	1	1	1	0	1	1	1	1	1	1	1	1	1	1	1	1	1	1	1	1	1	1	1	1	1	1	1	1	1	1	1
1	1	1	0	1	0	1	1	1	1	1	1	1	1	1	1	1	1	1	1	1	1	0	1	1	1	1	1	1	1	1	1	1	1	1	1	1	1	1	1	1	1	1	1	1	1	1	1	1	1
1	1	1	0	1	0	1	1	1	1	1	1	1	1	1	1	1	1	1	1	1	1	0	1	1	1	1	1	0	1	1	0	1	1	1	1	1	0	1	1	1	1	1	1	1	1	1	1	0	1
1	1	1	0	1	0	0	1	1	1	1	1	1	1	1	1	1	1	1	1	1	1	0	1	1	1	1	1	0	1	1	1	1	1	1	1	1	1	1	1	1	1	1	1	1	1	1	1	1	1
1	1	1	0	1	0	1	1	1	1	1	1	1	1	1	1	1	1	1	1	0	1	0	1	1	1	1	1	0	1	1	1	1	1	1	1	1	1	1	1	1	1	1	1	0	1	1	1	1	1
1	1	1	0	1	0	1	1	1	1	1	1	1	1	1	1	1	1	1	1	1	1	1	1	1	1	1	1	0	1	1	1	1	1	1	1	1	1	1	1	1	1	1	1	0	1	1	1	1	1
1	1	1	0	1	0	1	0	1	1	1	1	1	1	1	1	1	1	1	1	1	1	1	1	1	1	1	1	0	1	1	1	0	1	1	1	1	1	1	1	1	1	1	1	0	1	1	1	1	1
1	1	1	0	1	0	1	0	1	1	1	1	1	1	1	1	1	1	1	1	1	1	1	1	1	1	1	1	0	1	1	1	1	1	1	1	1	1	1	1	1	1	1	1	0	1	1	1	1	0
1	1	1	0	1	0	1	0	1	1	1	1	1	1	1	1	1	1	1	0	1	1	1	1	1	1	1	1	0	1	1	1	1	1	1	1	1	1	1	1	1	1	1	1	0	1	1	1	1	1
1	1	1	0	1	0	1	0	1	1	1	1	1	1	1	1	1	1	1	1	1	0	1	1	1	1	1	1	0	1	1	1	1	1	1	1	1	1	1	1	1	1	1	1	0	1	1	1	0	1
1	1	1	0	1	0	1	0	1	1	1	1	1	1	1	1	1	1	1	1	1	1	1	1	1	1	1	1	0	1	1	1	1	1	1	1	0	1	1	1	1	1	1	1	0	1	1	1	1	0
1	1	1	0	1	0	1	0	1	1	1	1	1	1	1	1	1	1	1	1	1	1	1	1	1	1	1	1	0	1	1	1	1	1	1	1	1	1	1	1	1	1	1	1	0	1	1	1	1	1
1	1	1	0	1	0	1	0	1	1	1	1	1	1	1	1	1	1	1	1	1	1	0	1	1	1	0	1	0	1	1	1	1	1	1	1	1	1	1	1	1	1	1	1	0	1	1	1	1	1
1	1	1	0	1	0	1	0	1	1	1	1	1	1	1	1	1	1	1	1	1	1	1	1	1	1	1	1	0	1	1	1	1	1	1	1	0	1	1	1	1	1	1	1	0	1	1	1	1	1
1	1	1	0	1	0	1	0	1	1	1	1	1	1	1	1	1	1	1	1	1	0	1	1	1	1	1	1	0	1	1	1	1	1	1	1	1	1	0	1	1	1	1	1	0	1	1	1	1	1
1	1	1	0	1	0	1	0	1	1	1	1	1	1	1	1	1	1	1	0	1	1	1	1	1	1	1	1	0	1	1	1	1	1	1	1	1	1	1	1	1	1	1	0	0	1	1	1	1	1
1	1	1	0	1	0	1	0	1	1	1	1	1	1	1	1	1	1	1	1	1	1	1	1	1	1	1	1	0	1	1	1	1	1	1	1	1	1	1	1	1	1	1	1	0	1	1	1	1	0
1	1	1	0	1	1	1	0	1	1	1	1	1	1	1	1	1	1	1	1	1	0	1	1	1	1	1	1	0	1	1	1	1	1	1	1	1	1	1	1	1	1	1	1	0	1	1	1	1	1
1	1	1	0	1	1	1	0	1	1	1	1	1	1	1	1	1	1	1	1	1	1	1	1	1	1	1	1	0	1	1	1	1	1	1	0	1	1	1	1	1	1	1	1	0	1	1	1	1	1
1	1	1	0	1	1	1	0	1	1	1	1	1	1	1	1	1	1	1	1	1	1	1	1	1	1	1	1	0	1	1	1	1	1	1	1	1	1	1	1	1	1	1	1	0	1	1	1	1	1
1	1	1	0	1	1	1	0	1	1	1	1	1	1	1	1	1	1	1	1	1	1	1	1	1	1	0	0	0	1	1	1	1	1	1	1	1	1	1	1	1	1	0	1	0	1	1	1	1	1
1	1	1	0	1	1	1	0	1	1	1	1	1	1	1	1	1	1	1	0	1	1	1	1	1	1	1	1	0	1	1	1	1	1	1	1	1	1	1	1	1	1	1	1	0	1	1	1	1	1
1	1	1	0	1	1	1	0	1	1	1	1	1	1	1	1	1	1	1	1	1	1	0	1	1	1	1	1	0	1	1	1	1	1	1	1	1	1	1	1	1	1	1	1	0	1	1	1	1	0
1	1	1	0	1	1	1	0	1	1	1	1	1	1	1	1	1	1	1	1	1	1	1	1	1	1	1	1	0	1	1	1	1	1	1	1	1	1	1	1	1	1	1	1	0	1	1	1	1	0
1	1	1	0	1	1	1	0	1	1	1	1	1	1	1	1	0	1	1	1	1	1	1	1	1	1	1	1	0	1	1	1	1	1	1	1	1	1	1	1	1	1	1	1	0	1	1	1	1	0
1	0	1	0	1	1	1	0	1	1	1	1	1	1	1	1	1	1	1	1	1	1	1	1	1	1	1	1	0	1	1	1	1	1	0	1	1	1	1	1	1	1	1	1	0	1	1	1	1	0
1	1	1	0	1	1	1	0	1	1	1	1	1	1	1	1	1	1	1	0	1	1	1	1	1	1	1	1	0	1	1	1	1	1	1	1	1	1	1	1	1	1	1	1	0	1	1	0	0	0
1	1	1	0	1	1	1	0	1	1	1	1	1	1	1	1	1	1	1	1	1	1	1	1	1	1	1	1	0	1	1	1	1	1	1	1	1	1	1	1	1	1	1	1	0	1	1	1	1	0
1	1	1	0	1	1	1	0	1	1	1	1	1	1	1	1	1	1	1	1	1	1	1	1	1	1	1	1	0	1	1	1	1	1	1	1	1	1	1	1	0	1	1	1	0	1	1	1	1	0
1	1	1	0	1	1	1	0	1	1	1	1	1	0	1	1	1	1	1	1	1	1	1	1	1	1	1	1	0	1	1	1	1	1	1	1	0	1	1	1	1	1	1	1	0	1	1	1	1	0
1	1	1	0	1	1	1	0	1	1	1	1	1	1	1	1	1	1	1	0	1	1	1	1	1	1	1	1	0	1	1	1	1	1	1	1	1	1	1	1	1	1	1	1	0	1	1	0	1	0
1	1	1	0	1	1	1	0	1	1	1	1	1	1	1	1	1	1	1	1	1	1	1	1	1	1	1	1	1	1	1	1	1	1	1	1	1	1	1	1	1	1	1	1	0	1	1	1	1	0
1	1	1	0	1	1	0	0	1	1	1	1	1	1	1	1	1	1	1	1	1	1	1	1	1	1	1	1	1	1	1	1	1	1	1	1	1	1	1	1	1	1	1	1	0	1	1	1	1	0
1	1	1	0	1	1	1	0	1	1	1	1	1	1	1	1	1	1	1	1	1	1	1	1	1	1	1	1	1	1	1	1	1	0	1	1	1	0	1	1	0	1	1	1	0	1	1	1	1	0
1	1	1	0	1	1	1	1	1	1	1	1	1	1	1	1	1	1	1	0	1	1	1	1	1	1	1	1	1	1	1	1	0	1	1	1	1	1	1	1	1	1	1	1	0	1	1	1	1	0
1	1	1	0	1	1	1	1	1	1	1	1	1	1	1	1	1	1	1	1	1	1	1	1	1	1	1	1	1	1	1	1	1	1	1	1	1	1	1	1	1	1	1	1	0	1	1	1	1	0
1	1	1	0	1	1	1	1	1	1	1	1	0	1	1	1	1	1	1	1	1	1	1	1	1	1	1	1	1	1	1	1	1	1	1	1	1	1	1	1	1	1	1	1	0	1	1	1	1	0
1	1	1	0	1	1	1	1	1	1	1	1	1	1	1	1	1	1	1	1	1	1	1	1	1	1	1	1	1	1	1	1	1	1	1	1	1	1	1	1	1	1	1	1	0	1	1	1	1	0
1	1	1	0	1	1	1	1	1	1	1	1	1	1	1	1	1	1	1	1	1	1	1	1	1	1	1	1	1	1	1	1	1	1	1	1	1	1	1	1	1	1	1	1	0	1	1	1	1	0
1	1	1	0	1	1	1	0	1	1	1	1	0	1	1	1	1	1	1	1	1	0	1	1	1	1	1	1	1	1	1	1	1	1	1	1	1	1	1	1	1	1	1	1	0	1	1	1	1	0
1	1	1	0	1	1	1	1	1	1	1	1	1	1	1	1	1	1	1	1	1	1	1	1	1	1	1	1	1	1	1	1	1	1	1	1	1	1	1	1	1	1	1	1	0	1	1	1	1	0
1	1	1	0	1	1	1	1	1	1	1	1	1	1	1	1	1	1	1	1	1	1	1	1	1	1	1	1	1	1	1	1	1	1	1	1	1	1	1	1	1	0	1	1	0	1	1	1	1	0
1	1	1	0	1	1	1	1	1	1	1	1	1	1	1	1	1	1	1	1	1	1	1	1	1	1	1	1	1	1	1	1	1	1	1	1	1	1	1	1	1	1	1	1	0	1	1	1	1	0
1	1	1	0	1	1	1	1	1	1	1	1	1	1	1	1	1	1	1	1	1	1	1	1	0	1	1	1	1	1	1	1	1	1	1	1	1	1	1	1	1	1	1	1	0	1	1	1	1	0
1	1	1	0	1	1	1	1	1	1	1	1	1	1	1	1	1	1	1	1	1	1	1	1	1	1	1	1	1	1	1	1	1	1	1	1	1	0	1	1	1	1	1	1	0	1	1	1	0	0
1	1	1	0	1	1	1	1	1	1	1	1	1	1	1	1	1	1	1	1	1	1	1	1	1	1	1	1	1	1	1	1	1	1	1	1	1	0	1	1	1	1	1	1	0	1	0	1	1	0
1	1	1	0	1	1	1	0	1	1	1	1	1	1	1	1	1	1	1	1	1	1	1	1	1	1	1	1	1	1	1	1	1	1	1	1	1	0	1	1	1	1	1	1	0	1	1	1	1	0
1	1	1	0	1	1	1	1	1	1	1	1	1	1	1	1	1	1	1	1	1	1	1	1	1	1	1	1	1	1	1	1	1	1	1	1	1	0	1	1	1	1	0	1	0	1	1	1	1	0
1	1	1	0	1	1	1	1	1	1	1	1	1	1	1	1	1	1	1	1	1	1	1	1	1	1	1	1	1	1	1	1	1	1	1	1	1	0	1	1	1	1	1	1	0	0	1	1	1	0
1	1	1	0	1	0	1	1	1	1	1	1	1	1	1	1	1	1	1	1	1	1	1	1	1	1	1	1	1	1	1	1	1	1	1	1	1	0	1	1	1	1	1	0	0	1	1	1	1	0
1	1	1	0	1	1	1	1	1	1	1	1	1	1	1	1	0	1	1	1	1	1	1	1	1	1	1	1	1	1	1	1	1	1	1	1	1	0	1	1	1	1	1	1	0	1	1	1	1	0
1	1	1	0	1	1	1	1	1	1	1	1	1	1	1	1	1	1	1	1	1	1	1	1	1	1	1	0	1	1	1	1	1	1	1	1	1	0	1	1	1	0	1	1	0	1	1	1	1	0
1	1	1	0	1	1	1	1	1	1	1	1	1	1	1	1	1	1	1	1	1	1	1	1	1	1	1	1	1	1	1	1	1	1	1	1	1	0	1	1	1	1	1	1	0	1	1	1	1	0
1	0	1	0	1	1	1	1	1	1	1	1	1	1	1	0	1	1	1	1	1	1	1	1	1	1	1	1	1	1	1	1	1	1	1	1	1	0	1	1	1	1	1	1	0	1	1	1	1	0
1	1	1	0	1	1	1	1	1	1	1	1	1	1	1	1	1	1	1	1	1	1	1	0	1	1	1	1	1	1	1	1	0	1	1	1	1	0	1	1	1	1	1	1	0	1	1	1	1	0
1	1	1	0	1	1	1	1	1	1	1	1	1	1	1	1	1	0	1	1	1	1	1	1	1	1	1	1	0	1	1	1	1	1	1	1	1	0	1	1	1	1	1	1	0	1	1	1	1	0
1	1	1	0	1	1	1	1	1	1	1	1	1	1	1	1	1	0	1	1	1	1	1	1	1	1	1	1	1	1	1	1	1	1	1	1	1	0	1	1	1	1	1	1	0	1	1	1	1	0
1	1	1	0	1	1	1	1	1	1	1	1	1	1	1	1	1	0	1	1	0	1	1	1	1	1	0	1	1	1	1	1	1	1	1	1	1	0	1	1	1	1	1	1	0	1	1	1	1	0
1	1	1	0	1	1	1	1	1	1	1	1	1	1	1	1	1	0	0	1	0	1	1	1	1	1	1	1	1	1	1	1	1	1	1	1	1	0	1	1	1	1	1	1	0	1	1	1	1	0
1	1	1	0	1	1	1	1	1	0	1	1	1	1	1	1	1	0	1	1	0	1	1	1	1	1	1	1	1	1	1	1	1	1	1	1	1	0	1	1	1	1	1	0	0	1	1	1	1	0
1	1	1	0	1	1	0	1	1	1	1	1	1	1	1	1	1	0	1	1	0	1	1	1	1	1	1	1	1	1	1	1	1	1	1	1	1	0	1	1	1	1	1	1	0	1	1	1	1	0
1	1	1	0	1	1	1	1	1	1	1	1	1	1	1	1	1	0	1	1	0	1	1	1	1	1	1	1	1	1	1	1	1	1	1	1	1	0	1	1	1	1	1	1	0	0	1	1	1	0
1	1	1	0	1	1	1	1	1	1	1	1	1	1	1	1	1	0	1	1	0	1	1	1	1	1	1	1	1	1	1	1	1	1	1	1	1	0	1	1	1	1	1	1	0	1	1	1	1	0
1	1	1	0	1	1	1	1	1	1	1	1	1	1	1	1	1	0	1	1	0	1	1	1	1	1	0	0	1	1	1	1	1	1	1	1	1	0	1	1	1	1	1	1	0	1	1	1	1	0
1	1	1	0	1	1	1	1	1	1	1	1	1	1	1	1	1	0	1	1	0	1	1	1	1	1	1	1	1	1	1	1	1	1	1	1	1	0	1	1	1	1	1	1	0	1	1	1	1	0
1	1	1	0	1	1	1	1	1	1	1	1	1	1	1	1	1	0	1	1	0	1	1	1	1	1	1	1	1	1	1	1	1	1	1	1	1	0	1	1	1	1	1	1	0	1	1	1	1	0
1	1	1	0	1	1	1	1	1	1	1	1	1	1	1	1	1	0	1	1	0	1	1	1	1	1	1	1	1	1	1	1	1	1	1	1	1	0	1	1	1	1	1	1	0	1	0	1	1	0
1	1	1	0	1	1	1	1	1	1	1	1	1	1	1	1	1	0	1	1	0	1	1	1	1	1	1	1	1	1	1	0	1	1	1	1	1	0	1	1	1	1	1	1	0	0	1	1	1	0
1	1	1	0	1	1	1	1	1	1	1	1	1	1	1	1	1	0	1	1	0	1	1	1	1	1	1	1	1	1	1	1	1	1	1	1	1	0	1	1	1	1	1	1	0	1	1	1	1	0
1	1	1	0	1	1	1	1	1	1	1	1	1	1	1	1	1	0	1	1	0	1	1	1	1	1	1	1	1	1	1	1	1	1	1	1	1	0	1	1	1	1	1	1	1	1	1	1	1	0
1	1	1	0	1	1	1	1	1	1	1	1	1	1	1	1	1	0	0	1	0	1	1	1	1	1	1	1	0	0	1	1	1	1	1	1	1	0	1	1	1	1	1	1	1	1	1	1	1	0
1	1	1	0	1	1	1	1	1	1	1	1	1	1	1	1	1	0	1	1	1	1	1	0	1	1	1	1	1	1	1	1	1	1	1	1	1	0	1	1	1	1	1	1	1	1	1	1	1	0
1	1	1	0	1	1	1	1	1	1	1	1	1	1	1	1	1	0	1	1	1	1	1	1	1	1	1	1	1	1	1	1	1	1	1	1	1	0	1	1	1	1	1	1	1	1	1	1	1	0
1	1	1	0	1	1	1	1	1	1	1	1	1	1	1	1	1	0	1	1	1	1	1	1	1	1	1	1	1	1	1	1	1	1	1	1	1	0	1	1	1	1	1	1	1	1	1	1	1	0
1	1	1	0	1	1	1	1	1	1	1	1	1	1	1	1	1	0	1	1	1	1	1	1	1	1	1	1	1	1	1	1	1	1	1	1	1	0	1	1	1	1	1	1	1	1	1	1	1	0
1	1	1	0	1	1	1	1	1	1	1	1	1	1	1	1	1	0	1	1	1	1	1	1	1	1	1	1	1	1	1	1	1	1	1	1	1	0	1	1	1	1	1	1	1	1	1	1	1	0
1	1	1	0	1	1	1	1	1	1	1	1	1	1	1	1	1	0	1	1	1	1	1	1	1	1	1	1	1	1	1	1	1	1	1	1	1	0	1	1	1	1	1	1	1	1	1	1	1	0
1	1	1	0	1	1	1	1	1	1	1	1	1	1	1	1	1	0	1	1	1	1	1	0	1	1	1	1	1	1	1	1	1	1	1	1	1	0	0	1	1	1	1	1	1	1	1	1	1	0
1	1	1	0	1	1	1	1	1	1	1	0	1	1	1	1	1	0	1	1	1	1	1	1	1	1	1	1	1	1	1	1	1	1	1	1	1	0	1	1	1	1	1	1	1	1	1	1	1	0
1	1	1	0	1	1	1	1	1	1	1	1	1	1	1	1	1	0	1	1	1	1	1	1	1	1	1	1	1	1	1	1	1	1	1	1	1	0	1	1	1	1	1	1	1	1	1	1	1	0
0	1	1	0	1	1	1	1	1	1	1	1	1	1	1	1	1	0	1	1	1	1	1	1	1	1	1	1	1	1	1	1	1	1	1	1	1	0	1	1	1	1	1	1	1	1	1	1	1	0
1	1	1	0	1	1	1	1	1	1	1	0	1	1	1	1	1	0	1	1	1	1	1	1	1	1	1	1	0	1	1	1	1	1	1	1	1	0	1	1	1	1	1	1	1	1	1	1	1	0
1	1	0	0	1	1	1	1	1	1	1	1	1	1	1	1	1	0	1	1	1	1	1	1	1	1	1	1	1	1	1	1	1	1	1	1	1	0	1	1	1	1	1	1	1	1	1	1	1	0
1	1	1	0	1	1	1	1	1	1	1	1	1	1	0	1	1	0	1	1	1	1	1	0	0	1	1	1	1	1	1	1	1	1	1	1	1	0	1	1	1	1	1	1	1	1	1	1	1	0
1	1	1	0	1	1	1	1	1	1	1	1	1	1	1	1	1	0	1	1	1	1	0	1	1	1	1	1	1	1	1	1	1	1	1	1	1	0	1	1	1	1	1	1	1	1	0	1	1	0
1	1	1	0	1	1	1	1	1	1	1	1	1	1	1	1	1	0	1	1	1	1	1	1	1	1	1	1	0	1	1	1	1	1	1	1	1	0	1	1	1	1	1	1	1	1	1	1	1	0
1	1	1	0	1	1	1	1	1	1	1	1	1	1	1	1	1	0	1	1	1	1	1	1	1	1	1	1	1	1	1	1	1	1	1	1	1	0	1	1	1	1	1	1	1	0	1	1	1	0
1	1	1	0	1	1	1	1	1	1	1	1	1	1	1	1	1	0	1	1	1	1	1	1	1	1	1	1	1	1	1	1	1	1	1	1	1	0	1	1	1	1	1	1	1	1	0	1	1	0
1	1	1	0	1	1	1	1	1	1	1	1	1	1	1	1	1	0	1	1	1	1	1	1	1	0	1	1	1	1	1	1	1	1	1	1	1	0	1	1	1	1	1	1	1	1	1	1	1	0
1	1	1	0	1	1	1	1	1	1	1	1	1	1	1	1	1	0	1	1	1	1	1	1	1	0	1	1	1	1	1	1	1	1	1	1	1	0	1	1	1	0	1	1	1	1	1	1	1	0
1	1	1	0	1	1	1	1	1	1	1	1	1	1	1	1	1	0	1	1	1	1	1	1	1	1	1	1	1	1	1	1	1	1	1	1	1	0	0	1	1	1	1	1	1	1	1	1	1	0
1	1	1	0	0	1	1	1	1	1	1	1	1	1	1	1	1	0	1	1	1	1	1	1	1	1	1	1	1	1	1	1	1	1	1	1	1	0	0	1	1	1	1	1	1	0	1	1	1	0
1	1	1	0	1	1	0	1	1	1	1	1	1	1	1	1	1	0	1	0	0	1	1	1	1	1	1	1	1	1	1	1	1	1	1	1	1	0	1	1	1	1	1	1	1	1	1	1	1	0
0	1	1	0	1	1	1	1	1	1	1	1	1	1	1	1	1	1	1	1	1	1	1	1	1	1	1	1	1	1	1	1	1	1	1	1	1	0	1	1	0	0	1	1	1	1	0	1	1	0
1	1	1	0	1	1	1	1	1	1	1	1	1	1	1	1	1	1	1	1	1	1	1	1	1	1	1	1	1	1	1	1	1	1	1	1	1	0	1	1	1	1	1	1	1	1	1	1	1	0
1	1	1	0	1	1	1	1	1	1	1	1	1	1	1	1	1	0	1	1	1	1	1	1	1	0	1	1	1	1	1	1	1	1	1	1	1	0	0	1	1	1	1	1	1	1	1	1	1	0
1	1	1	0	1	1	1	1	1	1	1	1	0	1	1	1	1	1	1	1	1	1	1	1	1	1	1	1	1	1	1	1	1	1	1	1	1	0	1	1	1	0	1	1	1	1	1	1	1	0
1	1	1	0	1	1	1	1	1	1	1	1	1	1	1	1	1	1	1	1	1	1	1	1	1	1	1	1	1	1	1	1	1	1	1	0	1	0	1	1	1	1	1	1	1	1	1	1	1	0
1	1	1	0	1	1	1	1	1	1	1	1	1	1	1	1	1	1	1	1	0	1	1	1	1	1	1	1	1	1	1	1	1	1	0	1	1	0	1	1	1	1	1	1	1	1	1	1	1	0
1	1	1	0	1	1	1	1	1	1	0	1	1	1	1	1	1	1	1	1	1	1	1	1	1	1	1	1	1	1	1	1	1	1	1	1	1	1	1	1	1	1	1	1	1	1	1	1	1	1
1	1	1	0	1	1	1	1	1	1	1	1	1	1	1	1	1	1	1	1	1	1	1	1	1	1	1	1	1	1	1	1	1	1	1	1	1	1	1	1	1	1	1	1	1	1	1	1	1	1
1	1	1	0	1	1	1	1	1	1	1	1	1	1	1	1	1	1	1	1	1	1	1	1	1	1	1	1	1	0	1	1	1	1	1	1	1	1	1	1	1	1	1	1	1	1	1	1	1	1
1	1	1	0	1	1	1	1	1	1	1	1	1	1	1	1	1	1	1	1	1	1	1	1	1	1	1	1	1	1	1	1	1	1	1	1	1	1	1	1	1	1	0	1	1	1	1	1	1	0
1	1	1	0	1	1	1	1	1	1	1	1	1	1	0	1	1	1	1	0	1	1	1	1	1	1	1	1	1	1	1	1	1	1	1	1	1	0	1	1	1	1	1	1	1	0	1	1	1	1
1	1	1	0	1	1	1	1	1	1	1	1	1	1	1	1	1	1	1	0	1	1	1	1	1	1	1	1	1	1	1	1	0	1	1	1	1	1	0	1	1	1	1	1	1	1	1	1	1	1
0	1	1	0	1	1	1	1	1	1	1	1	1	1	1	1	1	1	1	0	1	1	1	1	1	0	1	1	1	1	1	1	1	1	1	1	1	1	1	1	1	1	1	1	1	1	1	1	1	1
1	1	1	0	1	1	1	1	1	1	1	1	1	1	1	1	1	1	1	0	1	1	1	1	1	1	1	1	1	1	1	1	1	1	1	1	1	1	1	1	1	1	1	1	1	1	1	1	1	1
1	1	1	0	1	1	1	1	1	1	1	1	1	1	1	1	1	1	1	0	1	1	1	1	1	1	1	1	1	1	1	1	1	1	1	1	1	1	1	0	1	1	1	1	1	1	1	1	1	1
1	1	1	0	1	1	1	1	1	1	1	1	1	1	1	1	1	1	1	0	1	1	1	1	1	1	1	1	1	1	1	1	1	1	1	1	1	0	0	1	1	1	1	1	1	1	1	1	1	1
1	1	1	0	1	1	1	1	1	1	1	1	1	1	1	1	1	1	1	0	1	1	1	1	1	1	1	1	1	1	1	1	1	1	1	1	1	1	1	1	1	1	1	1	1	1	1	1	1	1
1	1	1	0	1	1	1	1	1	1	1	1	1	1	1	1	1	1	1	0	1	1	1	1	1	1	1	1	1	1	1	1	1	1	1	0	1	1	1	1	1	1	1	1	1	1	1	1	1	1
1	1	1	0	1	1	1	1	1	1	1	1	1	1	0	1	1	1	1	0	1	1	1	1	1	1	1	1	1	1	1	1	1	1	1	1	1	1	1	1	1	1	1	1	1	1	1	0	1	1
1	1	1	0	1	0	1	1	1	1	0	1	1	1	0	1	1	1	1	0	1	1	1	0	1	1	1	1	1	1	1	1	1	1	1	1	1	1	1	1	1	1	1	1	1	1	1	1	1	1
1	1	1	0	1	1	1	1	1	1	1	1	1	1	0	1	1	1	1	0	1	1	1	1	1	1	1	1	1	1	1	1	1	1	0	1	1	1	1	1	1	1	1	1	1	1	0	1	1	1
1	1	1	0	1	1	1	1	1	1	1	1	1	1	0	1	1	1	1	0	1	1	1	1	1	1	1	1	1	0	1	1	1	1	1	1	1	1	1	1	1	1	1	1	1	1	1	1	1	1
1	1	1	0	1	1	1	1	1	1	1	1	1	1	0	1	1	1	1	0	1	1	1	1	1	1	1	0	1	1	1	1	1	1	1	1	1	1	1	1	1	1	1	1	1	1	1	0	1	1
1	1	1	0	1	1	1	1	0	1	1	1	1	1	0	1	1	1	1	0	1	1	1	1	1	1	1	1	1	1	1	1	1	1	1	1	1	1	1	1	1	1	1	1	1	1	1	0	1	1
1	1	1	0	1	1	1	1	1	1	1	1	1	1	0	1	1	1	1	0	1	1	1	1	1	1	1	1	1	0	1	1	1	1	1	1	1	1	1	1	1	1	0	1	1	0	1	0	1	1
1	1	1	0	1	1	1	1	1	1	1	1	1	1	0	1	1	1	1	0	1	1	1	1	1	1	1	1	1	1	1	1	1	1	1	1	1	1	1	1	1	1	0	1	1	1	1	0	1	1
0	1	1	0	1	1	1	1	1	1	1	1	1	1	0	1	1	0	1	0	0	1	0	1	1	1	1	1	1	1	1	1	1	1	1	1	1	1	1	1	0	1	1	1	1	1	1	1	1	1
1	1	1	0	1	1	1	1	1	1	0	1	1	1	0	1	1	1	1	0	1	1	1	1	1	1	1	1	1	1	1	1	1	1	1	1	1	1	1	1	1	1	1	1	1	1	1	1	1	1
1	1	1	1	1	1	1	1	1	1	1	1	1	1	0	1	1	1	1	0	1	1	1	1	1	1	1	1	1	1	1	1	1	1	1	1	1	1	1	1	1	1	1	1	1	1	1	1	1	1
1	1	1	1	1	1	1	1	1	1	1	1	1	1	0	1	1	1	1	0	1	1	1	1	1	1	1	1	1	1	1	1	1	1	1	1	1	1	1	1	1	1	1	1	1	1	1	1	1	1
1	1	1	1	1	1	1	1	0	1	1	1	1	1	0	1	1	1	1	0	1	1	1	1	1	1	1	1	1	1	1	1	1	1	1	1	1	1	1	1	0	1	1	1	1	1	1	1	1	1
1	1	1	1	1	1	1	1	1	1	1	1	1	1	0	1	1	1	1	0	0	1	1	1	1	1	1	1	1	1	1	1	1	1	1	1	0	1	1	1	0	0	1	1	1	1	1	1	1	1
1	1	1	1	1	1	1	1	1	1	1	1	1	1	0	1	1	1	1	0	1	1	1	1	1	1	1	1	1	1	1	1	1	1	1	1	1	1	1	1	0	1	1	1	1	1	1	1	1	1
1	1	1	1	0	1	1	1	1	1	1	1	1	1	0	1	1	1	1	0	1	0	1	1	1	1	1	1	1	1	1	1	1	1	1	1	1	1	1	1	0	1	1	1	1	1	1	1	1	1
1	1	1	1	1	1	1	1	1	1	1	1	1	1	0	1	1	1	1	0	1	1	1	1	1	1	1	1	1	1	1	1	1	1	1	1	1	1	1	1	0	1	1	1	1	1	1	1	1	1
1	1	1	1	1	1	1	1	1	1	1	1	1	1	0	1	1	1	1	0	1	1	1	1	1	1	1	1	1	1	1	1	1	1	1	1	1	1	1	1	0	1	1	1	1	1	1	1	1	1
1	1	1	1	1	1	1	1	1	1	1	1	1	1	0	1	1	1	1	0	1	1	1	1	1	1	1	1	1	1	1	1	1	1	1	1	1	1	1	1	0	1	1	1	1	1	1	1	1	1
1	1	0	1	1	1	1	1	1	1	1	1	1	1	0	1	1	1	1	0	1	1	0	1	1	1	1	1	1	1	1	1	1	1	1	1	1	1	1	1	0	1	1	1	1	0	1	1	1	1
1	1	1	1	1	1	1	1	1	1	1	1	1	1	0	1	1	1	1	0	1	1	0	1	1	1	1	1	1	1	1	1	1	1	1	1	1	1	0	1	0	1	0	1	1	1	1	1	1	1
1	1	1	1	1	1	0	1	1	1	1	1	1	1	0	1	1	1	1	0	1	1	0	1	1	1	1	1	1	1	1	1	1	1	1	1	1	1	1	1	0	1	1	1	1	1	1	1	1	1
1	1	1	1	1	1	1	1	1	1	1	0	1	1	0	1	1	1	1	0	1	1	0	1	1	1	1	1	1	1	1	1	1	1	1	1	1	1	1	1	0	1	1	1	1	1	1	1	1	1
1	1	1	1	1	1	1	1	1	1	1	1	0	1	0	1	1	1	1	0	1	1	0	1	1	1	1	1	1	1	0	1	1	1	1	1	1	1	1	1	0	1	1	1	1	1	1	1	1	1
1	1	1	1	1	1	1	1	1	1	1	1	1	1	0	1	1	1	1	0	1	1	0	1	1	1	1	1	1	1	0	1	1	1	1	1	1	1	1	1	0	1	1	1	1	1	1	1	1	1
1	1	1	1	1	1	1	1	1	1	1	1	1	1	0	1	1	1	1	0	1	1	0	1	1	1	1	1	1	1	0	1	1	1	1	1	1	1	1	1	0	1	1	1	1	1	1	1	1	1
1	1	1	1	1	1	1	1	1	1	1	1	1	1	0	1	1	1	1	0	1	1	0	1	1	1	1	1	1	1	0	1	1	1	1	1	1	1	1	1	0	1	1	0	1	1	1	1	1	1
1	1	1	1	1	1	1	1	1	1	1	1	1	1	0	1	1	1	1	0	1	1	0	1	1	1	1	1	1	1	0	1	1	1	1	1	1	1	1	1	0	1	1	1	1	1	1	1	1	1
1	1	1	1	1	1	1	1	1	1	1	1	1	1	0	1	1	1	1	0	1	1	0	1	1	1	1	1	1	1	0	1	1	1	1	1	1	1	1	1	0	1	1	1	1	1	1	1	1	1
1	1	1	1	1	1	0	1	1	1	1	1	1	1	0	1	1	1	1	0	1	1	0	1	1	1	1	1	1	1	0	1	1	1	1	1	1	1	1	1	0	0	1	1	1	1	1	1	1	1
1	1	1	1	1	1	1	1	1	1	1	1	1	1	0	1	1	1	1	0	1	1	0	1	1	1	1	1	1	1	0	1	1	1	1	1	1	1	1	1	0	1	1	1	1	1	1	1	1	1
1	1	1	1	1	1	1	1	1	1	1	1	1	1	0	1	1	1	1	0	0	1	0	1	1	1	1	1	1	1	0	1	1	1	1	1	1	1	1	1	0	1	1	1	1	1	1	1	1	1
1	1	1	1	1	1	1	1	1	1	1	1	1	1	0	1	1	1	1	0	1	1	0	1	1	1	1	1	1	1	0	1	1	1	1	1	1	1	1	1	0	1	1	1	1	1	1	1	1	1
1	1	1	1	1	1	1	1	1	1	1	1	1	1	0	1	1	1	1	0	1	1	0	1	1	1	1	1	1	1	0	1	1	1	1	0	1	1	1	1	0	1	1	1	1	1	1	1	1	1
1	1	1	1	1	1	1	1	1	1	1	1	1	1	0	1	1	1	1	0	1	1	0	1	1	1	1	1	1	1	0	1	1	1	1	1	1	1	1	1	0	1	1	1	1	1	1	0	1	1
1	1	1	1	1	1	1	1	1	1	1	1	1	1	0	1	1	1	1	0	1	1	0	1	1	1	1	1	1	1	0	1	1	1	1	1	1	1	0	1	0	1	1	1	1	0	1	1	1	1
1	1	1	1	1	1	1	1	1	1	1	1	1	1	0	1	1	1	1	0	1	1	0	1	1	1	1	1	1	1	0	1	1	1	1	1	1	1	0	1	0	1	1	1	1	0	1	1	1	1
1	1	1	1	1	1	1	1	1	1	1	0	1	1	0	1	1	1	1	0	1	1	0	1	1	1	1	0	1	1	0	1	1	1	1	1	1	1	0	1	0	1	1	1	1	0	1	1	1	1
1	1	1	1	1	1	1	1	1	1	1	1	1	1	0	1	1	1	1	0	1	1	0	1	1	1	1	1	1	1	0	1	1	1	1	1	1	1	0	1	0	1	1	1	1	0	1	1	1	1
1	1	1	1	1	1	0	1	1	1	1	1	1	1	0	1	1	0	1	0	1	1	0	1	1	1	1	1	1	1	0	1	1	1	1	1	1	1	0	1	0	1	1	1	1	0	1	1	1	1
1	1	1	1	1	1	1	1	1	1	1	1	1	1	0	1	1	1	1	0	1	1	0	1	1	1	1	1	1	1	0	0	1	1	1	1	1	1	0	1	0	1	1	1	1	1	1	1	1	1
1	1	1	1	1	1	1	1	1	1	0	1	1	1	0	1	1	1	1	0	1	1	0	1	1	1	1	1	1	1	0	1	1	1	1	1	1	1	0	1	0	1	1	1	1	1	1	1	1	1
1	1	1	1	1	1	1	1	1	1	1	1	1	1	0	1	1	1	1	1	1	1	0	1	1	1	1	1	1	1	0	1	1	1	1	1	1	1	0	1	0	1	1	1	1	1	1	1	1	1
1	1	1	1	1	1	1	1	1	1	1	1	1	1	0	1	1	1	1	1	1	1	0	1	1	1	1	1	1	1	0	1	1	1	1	1	1	1	0	1	0	1	1	1	1	1	1	1	1	1
1	1	1	1	1	1	1	1	1	1	1	1	1	1	0	1	1	1	1	1	1	1	0	1	1	1	1	1	1	1	0	1	1	1	1	1	1	1	0	1	0	1	1	1	1	1	1	1	1	1
1	1	1	1	1	1	1	1	1	1	1	1	1	1	0	1	1	1	1	1	1	1	0	1	1	1	1	1	1	1	0	1	1	1	1	1	1	1	0	1	0	1	1	1	1	1	1	1	1	1
1	1	1	1	0	1	1	1	1	1	1	1	1	1	0	1	1	1	1	1	1	1	0	1	1	1	1	1	1	1	0	1	1	1	1	1	0	1	0	1	0	1	1	1	1	1	1	1	1	1
1	1	1	1	1	1	1	1	1	1	1	1	1	1	0	1	1	1	1	1	1	1	0	1	1	1	1	1	1	1	0	1	1	1	1	1	1	1	0	1	0	0	1	1	1	1	1	1	1	1
1	1	1	1	1	1	1	1	1	1	1	1	1	1	0	1	1	1	1	1	1	1	0	1	1	1	1	1	1	1	0	1	1	1	1	1	1	1	0	1	0	1	1	1	1	1	1	1	0	1
1	1	1	1	1	1	1	1	1	1	1	1	1	1	0	1	1	1	1	1	1	1	0	1	1	1	1	1	1	1	0	1	1	1	1	1	1	1	0	1	0	1	1	1	1	1	1	1	1	1
1	1	1	1	1	1	1	1	1	1	1	1	1	1	0	1	1	1	1	0	1	1	0	1	1	1	1	1	1	1	0	1	1	1	1	1	1	1	0	1	0	1	1	1	1	1	1	1	1	1
1	1	1	1	1	1	1	1	1	1	1	1	1	1	0	1	1	1	1	1	1	1	0	1	1	1	1	1	1	1	0	1	1	1	1	1	1	1	0	1	0	1	1	1	1	1	1	1	1	1
1	1	1	1	1	1	1	1	1	1	1	1	1	1	0	1	1	1	1	1	1	1	0	1	1	1	1	1	1	1	0	1	1	1	1	1	1	1	0	1	0	1	1	1	1	1	1	1	1	1
1	1	1	1	1	1	1	1	1	1	1	1	1	1	0	1	1	1	1	1	1	1	0	1	1	1	1	1	1	1	0	1	1	1	1	1	1	1	0	1	0	1	1	1	1	1	1	1	1	1
1	1	1	1	1	1	1	1	1	1	1	1	1	1	0	1	1	1	1	1	1	1	0	1	1	1	1	0	1	1	0	1	1	1	1	1	1	1	0	1	0	1	0	1	1	1	1	1	0	1
1	0	1	1	1	1	1	1	1	1	1	1	1	1	0	1	1	1	1	1	0	1	0	1	1	1	1	1	1	1	0	1	1	1	1	1	1	1	0	1	0	1	1	1	1	1	1	1	1	1
1	1	1	1	1	1	1	1	1	1	1	1	1	1	0	1	1	1	1	1	0	1	0	1	1	1	1	1	1	1	0	1	1	1	1	1	1	1	0	1	0	1	1	1	1	1	1	1	1	1
1	1	1	1	1	1	1	1	1	1	1	1	1	1	0	1	1	1	1	1	0	1	0	1	1	1	1	1	1	1	0	1	1	1	1	1	1	1	0	1	0	1	1	1	1	1	1	1	1	1
1	1	1	1	1	1	1	1	1	1	1	1	1	1	0	0	1	1	1	1	0	1	0	1	1	1	1	1	1	1	0	1	1	1	1	1	1	0	0	1	0	1	1	0	1	1	1	1	0	1
1	1	1	1	1	1	0	1	1	1	1	1	1	1	0	1	1	1	1	1	0	1	0	1	1	1	1	0	1	1	0	1	1	1	1	1	1	1	0	1	0	0	1	1	0	1	1	1	1	1
1	1	1	1	1	1	1	1	1	1	0	1	1	1	0	1	1	1	1	1	0	1	0	1	1	1	1	1	1	1	0	1	1	1	1	1	1	1	0	1	0	0	1	1	1	1	1	1	1	1
1	1	1	1	1	1	1	1	1	1	1	1	1	1	0	1	1	1	1	1	0	1	0	1	1	1	1	1	1	1	0	1	1	1	1	1	1	1	0	1	0	0	1	1	1	1	1	1	1	1
1	1	1	1	0	1	1	1	1	1	1	1	1	1	0	1	1	1	0	1	0	1	0	1	0	1	1	1	1	1	0	1	1	1	1	1	1	1	0	1	0	0	1	1	1	1	1	1	1	1
1	1	1	1	1	1	1	1	1	1	1	1	1	1	0	0	1	1	1	1	0	1	0	1	1	1	1	1	1	1	0	1	1	1	1	1	1	1	0	1	0	0	1	1	1	1	1	1	1	1
1	1	1	1	1	1	1	1	1	1	1	1	1	1	0	1	1	1	1	1	0	1	0	1	1	0	1	1	1	1	0	1	1	1	0	1	1	1	1	1	0	0	1	1	1	1	1	1	0	1
1	0	1	1	1	1	1	1	1	1	1	1	1	1	0	1	1	1	1	1	0	1	0	1	1	1	1	1	0	1	0	1	1	1	1	1	1	1	1	1	0	0	1	1	1	1	1	1	1	1
1	1	1	1	1	1	1	1	1	1	1	1	1	1	0	1	1	1	1	1	0	1	0	1	1	1	1	1	0	1	0	1	1	1	1	1	1	0	1	1	0	0	1	1	1	1	1	1	1	1
1	1	1	1	1	1	1	1	1	1	1	1	1	1	0	1	1	1	1	1	0	1	0	1	0	1	1	1	0	1	0	1	1	1	1	1	1	1	1	1	0	0	1	1	1	1	1	1	1	1
1	1	1	1	1	1	1	1	1	1	1	1	1	1	0	1	1	1	1	1	0	1	0	1	1	1	1	1	0	1	0	1	1	1	1	1	1	1	1	1	0	0	1	1	1	1	1	1	1	1
1	1	1	1	1	1	1	1	1	1	1	1	1	1	0	1	1	1	1	1	0	1	0	1	1	1	1	1	0	1	0	1	1	1	1	1	1	1	1	1	0	0	1	1	1	1	1	1	1	1
1	1	1	1	1	1	1	1	1	1	1	1	1	1	0	1	1	1	1	1	0	0	0	1	1	1	1	1	0	0	0	1	1	1	1	1	1	1	1	1	0	0	1	1	1	1	1	1	1	1
1	1	1	1	1	1	1	1	1	1	1	1	1	1	0	1	1	1	1	1	0	1	0	1	1	1	1	1	0	1	0	1	1	1	1	1	1	0	1	1	0	0	1	1	1	1	1	0	0	1
1	1	1	1	1	1	1	1	1	1	1	1	1	1	0	1	1	1	1	1	0	1	0	1	0	1	1	1	0	1	0	1	1	1	1	1	0	1	1	1	0	0	1	1	1	1	1	1	1	1
1	1	1	1	1	1	1	1	1	1	1	1	1	1	1	1	1	1	1	1	0	1	0	1	1	1	1	1	0	1	0	1	1	1	1	1	1	1	1	1	0	0	0	1	1	1	1	1	1	1
1	1	1	1	1	1	1	0	1	0	1	1	1	1	1	1	1	1	1	1	0	1	0	1	1	1	1	1	0	1	0	1	1	1	1	1	1	1	1	1	0	0	1	1	1	1	1	1	1	1
1	1	1	1	1	1	1	1	1	1	1	1	1	1	1	1	1	1	1	1	0	1	0	1	1	1	1	1	0	1	0	1	1	1	1	1	1	1	1	1	0	0	1	1	1	1	1	1	1	1
1	1	1	1	1	1	1	1	1	1	1	1	1	1	1	1	1	1	1	1	0	1	0	1	1	1	1	1	0	1	0	1	1	1	1	1	1	1	1	1	0	0	1	1	1	1	1	1	1	1
1	1	1	1	1	1	1	1	1	1	1	1	1	1	1	1	1	1	1	1	0	1	0	1	1	0	1	1	0	1	0	1	1	1	1	1	1	1	1	1	0	0	1	0	1	1	1	1	1	1
1	1	1	1	1	1	1	1	1	1	1	1	1	1	1	1	1	1	1	1	0	1	0	1	1	1	1	1	0	1	0	0	1	1	1	1	0	1	1	1	0	0	1	0	1	1	1	1	0	1
1	1	1	1	1	1	1	0	1	1	1	1	1	0	1	1	1	1	1	1	1	1	0	1	1	1	1	1	0	1	0	1	1	1	1	1	1	1	1	1	0	0	0	0	1	1	1	1	1	1
1	1	1	1	1	1	1	0	1	0	1	1	1	1	1	1	1	1	1	1	1	1	0	1	1	1	1	1	0	1	0	1	1	1	1	1	1	1	1	1	0	0	1	0	1	1	1	0	1	1
1	1	1	1	1	1	1	0	1	1	1	1	1	1	1	1	1	1	1	1	1	1	0	1	1	1	0	1	0	1	0	1	1	1	1	1	1	1	1	1	0	0	1	0	1	1	1	1	1	1
1	1	1	1	1	1	1	0	1	1	1	1	1	1	1	1	1	1	1	1	1	0	0	1	1	1	1	1	0	1	0	1	1	1	0	1	1	1	1	1	0	0	1	0	1	1	1	1	1	1
1	1	1	1	1	1	1	1	1	1	1	1	1	1	1	1	1	1	1	1	0	0	0	1	1	1	1	1	0	1	0	1	1	1	1	1	0	0	1	1	0	0	1	0	1	1	1	1	1	1
1	1	1	1	1	1	1	1	1	1	1	1	0	1	1	1	1	1	1	1	1	0	0	1	1	1	0	1	0	1	0	1	1	1	1	1	1	1	1	1	0	0	1	0	1	0	1	1	1	0
1	1	1	1	1	1	1	1	1	1	1	1	1	1	1	1	1	1	1	1	1	0	0	1	1	1	1	1	0	1	0	1	1	1	1	1	1	1	1	1	0	0	1	0	1	1	1	1	1	1
1	1	1	1	0	1	1	1	1	1	1	1	1	1	1	1	1	1	1	1	1	0	0	1	1	1	1	1	0	1	0	1	1	1	1	1	1	1	1	1	0	0	1	1	1	1	1	1	1	1
1	1	1	1	1	0	1	1	1	1	1	1	1	1	0	1	1	1	1	1	0	0	0	1	1	1	1	1	0	1	0	1	1	1	1	1	1	1	1	1	0	0	1	1	1	1	1	1	1	1
1	1	1	1	1	1	1	1	1	1	1	1	1	1	1	1	1	1	1	0	1	0	0	1	1	1	1	1	0	1	0	1	1	1	1	1	1	1	1	1	0	0	1	1	1	1	1	1	1	1
1	1	1	1	1	1	1	1	1	0	1	1	1	1	1	1	1	1	1	1	1	0	0	1	1	1	1	1	0	1	0	1	1	1	1	1	1	0	1	1	0	0	1	0	1	1	1	1	1	1
1	1	1	1	1	1	1	1	1	1	1	1	1	1	1	1	1	1	1	1	1	0	0	1	1	1	1	1	0	1	0	0	1	1	1	1	1	1	1	1	0	0	1	1	1	1	1	1	1	1
1	1	1	1	1	0	1	1	1	1	1	1	1	1	1	1	1	1	1	1	0	0	0	1	1	1	1	1	0	1	0	1	1	1	1	1	1	1	1	1	0	0	1	1	1	1	1	1	1	1
1	1	1	1	1	0	1	1	1	1	1	1	1	1	1	1	1	1	1	1	1	0	0	1	1	1	1	1	0	1	0	1	1	1	1	1	1	1	1	1	0	0	1	0	1	1	1	1	1	1
1	1	1	1	1	0	1	1	1	1	1	1	1	1	1	1	1	1	1	1	1	0	0	1	1	1	1	1	0	1	0	1	1	1	1	1	1	0	1	1	0	0	1	1	1	1	1	1	1	1
1	1	1	1	1	0	1	1	1	1	1	1	1	0	1	1	1	1	1	1	1	0	0	1	1	1	1	1	0	1	0	1	1	1	1	1	1	1	1	1	0	0	1	1	1	1	1	1	1	1
1	1	1	1	1	0	1	1	1	1	1	1	1	1	1	1	1	1	1	1	1	0	0	1	1	1	1	1	0	1	0	1	0	1	1	1	1	1	1	1	0	0	0	1	1	1	1	1	1	1
1	1	1	1	1	0	1	1	1	1	1	0	1	1	1	1	1	1	1	1	1	0	0	1	1	1	1	1	0	1	0	1	1	1	1	1	1	0	1	1	0	0	1	1	1	1	1	1	1	1
1	1	1	1	1	0	1	1	1	0	1	1	1	1	1	1	1	1	1	1	1	0	0	1	1	1	1	1	0	1	0	1	1	1	1	1	1	1	1	1	0	0	1	1	1	1	1	1	1	1
1	1	1	1	1	0	1	1	1	0	1	1	1	1	1	1	1	1	1	1	1	0	0	1	1	1	1	1	0	1	0	1	1	1	1	1	1	1	1	1	0	0	1	1	1	1	1	1	1	1
1	1	1	1	1	0	1	1	1	0	1	1	1	1	1	1	1	1	1	1	1	0	1	1	1	1	1	1	0	1	0	1	1	1	1	1	1	1	1	1	0	0	1	1	1	1	1	1	1	1
0	1	1	1	1	0	1	1	1	0	1	1	1	1	1	1	1	1	1	1	1	0	1	1	1	1	1	1	0	0	0	1	1	1	1	1	1	0	1	1	0	0	1	1	1	1	1	1	1	1
1	1	1	1	1	0	1	1	1	0	1	1	1	1	0	1	1	1	1	1	1	0	1	1	1	1	1	1	0	1	0	1	1	1	1	1	1	1	1	1	0	0	1	1	1	1	1	1	1	1
1	1	1	1	1	0	1	0	1	0	1	1	1	1	1	1	1	1	1	1	1	0	1	1	1	1	1	1	0	1	0	1	1	1	1	1	1	1	1	1	0	0	1	1	1	1	1	1	1	1
1	1	1	0	1	0	1	1	1	0	1	1	1	1	1	1	1	1	1	1	0	0	1	1	1	1	1	1	0	1	0	1	1	1	1	1	1	1	1	1	0	0	1	1	1	1	1	1	1	1
1	1	1	1	1	0	1	1	1	1	1	1	1	1	1	1	1	1	1	1	1	0	1	1	1	1	1	1	0	1	0	1	1	1	1	1	1	1	1	1	0	0	1	1	1	1	1	1	1	1
1	1	1	1	0	0	1	1	1	1	1	1	1	1	1	1	1	1	1	1	1	0	1	1	1	1	1	1	0	1	0	1	1	1	0	0	1	1	1	1	0	0	1	1	1	1	1	1	0	1
0	0	1	1	1	0	1	1	1	1	1	1	1	1	1	1	1	1	1	1	1	0	1	1	1	1	1	1	0	1	0	1	1	1	1	1	1	1	1	1	0	0	1	1	1	1	1	1	1	1
1	1	1	1	1	0	1	1	0	1	1	1	1	1	1	1	1	1	1	1	1	0	1	1	1	1	1	1	0	0	0	1	1	1	1	1	1	1	1	1	0	0	1	1	1	1	1	1	1	1
1	1	1	1	1	0	1	1	1	1	1	1	1	1	1	1	1	0	1	1	1	0	1	1	1	1	1	1	0	1	0	1	1	1	1	1	1	1	1	1	0	0	1	1	1	1	1	1	1	1
1	1	1	1	1	0	1	1	1	1	1	1	1	0	1	1	1	1	1	1	1	0	1	1	1	1	1	1	0	1	0	1	1	1	1	1	1	1	1	1	0	0	1	1	1	1	1	1	1	0
1	1	1	1	0	0	1	1	1	1	1	1	1	1	1	1	1	1	1	1	1	0	1	1	1	1	1	1	0	1	0	1	1	1	1	1	1	1	1	1	0	0	1	1	0	1	1	0	1	1
1	1	1	1	1	0	1	1	1	1	1	1	1	1	1	1	1	1	1	1	1	0	1	1	1	1	1	1	0	1	0	1	1	1	1	1	1	1	1	1	0	0	1	1	1	1	1	1	1	1
1	1	1	1	1	0	1	1	1	1	1	1	1	1	1	1	1	1	1	1	1	0	1	0	1	1	1	1	0	1	0	1	1	1	1	1	1	1	1	1	0	0	1	1	1	1	1	1	1	0
1	1	1	1	1	0	1	1	1	1	1	1	1	1	1	1	1	1	1	1	1	0	1	1	1	1	1	1	0	1	0	1	1	1	1	1	1	1	1	1	0	0	1	1	1	1	1	0	0	1
1	1	1	1	1	1	1	1	1	1	1	1	1	1	1	1	1	1	1	1	1	0	1	1	1	1	1	1	0	1	0	1	1	1	1	1	1	1	1	1	0	0	1	1	1	1	1	0	1	1
1	1	1	1	1	1	1	1	1	1	1	1	1	1	1	1	1	1	1	1	1	0	1	1	1	1	1	1	0	1	0	1	1	1	1	1	1	1	1	1	0	0	1	1	1	1	1	0	1	1
1	1	1	1	1	1	1	1	1	1	1	1	0	1	1	1	1	1	1	1	1	0	1	1	1	1	1	1	0	1	0	1	1	1	1	1	1	1	1	1	0	0	1	0	1	1	1	0	1	1
1	1	1	1	1	1	1	1	1	1	1	1	1	1	1	0	1	1	1	1	1	0	1	1	1	1	1	1	0	1	0	1	1	1	1	1	1	1	1	1	0	0	1	1	1	1	1	0	1	1
1	1	1	1	1	1	1	1	1	1	1	1	1	1	1	1	1	1	1	1	1	0	1	1	1	1	1	1	0	1	0	1	1	1	1	1	1	1	1	1	0	0	1	1	0	1	1	0	1	0
1	1	1	1	1	1	1	1	1	0	1	1	1	1	1	1	1	1	1	1	1	0	1	1	1	1	1	1	0	1	0	1	1	1	1	1	1	0	1	1	0	1	1	1	1	1	1	0	1	1
1	1	1	1	0	1	1	1	1	1	1	1	1	1	1	1	1	1	1	1	1	0	1	1	1	1	1	1	0	1	0	1	1	1	1	1	1	1	1	1	0	1	1	1	1	1	1	0	1	1
1	1	1	1	1	1	1	1	1	1	1	1	1	1	1	1	1	1	1	1	1	0	1	1	1	1	1	1	0	1	0	1	1	1	1	1	1	1	1	1	0	1	1	1	1	1	0	0	1	1
1	1	1	1	1	0	1	1	1	1	1	1	1	1	1	1	1	1	1	1	1	0	1	1	1	1	1	1	0	1	0	1	1	1	1	1	1	1	1	1	0	1	1	1	1	1	1	0	1	1
1	1	1	1	1	1	1	1	1	0	1	1	1	1	1	1	1	1	1	1	1	0	1	1	1	1	1	1	1	1	0	1	1	1	1	1	1	1	1	1	0	1	1	1	1	1	1	0	0	1
1	1	1	1	1	1	1	1	1	1	1	1	1	1	1	1	1	1	1	0	1	0	1	1	1	1	1	1	1	1	0	1	1	1	1	1	1	1	1	1	0	1	1	1	1	1	1	0	1	1
1	1	1	1	0	0	1	1	1	1	1	1	1	1	1	1	1	1	1	0	1	0	1	1	1	1	1	1	1	1	0	1	1	1	1	1	1	1	1	1	0	1	1	1	1	1	1	0	1	1
1	1	1	1	1	1	1	1	1	1	1	1	1	1	1	1	1	1	1	0	1	0	1	1	1	1	1	1	1	1	0	1	1	1	1	1	1	1	1	1	0	1	1	1	1	1	1	0	1	1
1	1	1	1	1	1	1	1	1	1	1	1	1	1	1	1	1	1	1	0	1	0	1	1	1	1	1	1	1	1	0	1	1	1	1	1	1	1	1	1	0	1	1	1	1	1	1	0	1	1
1	1	0	1	1	1	1	0	1	1	1	1	0	1	1	0	1	1	1	0	1	0	1	1	1	1	1	1	1	1	0	1	1	1	1	1	1	1	1	1	0	1	1	1	1	1	1	0	1	1
1	1	1	1	1	1	1	1	1	1	1	1	1	1	1	1	1	1	1	0	1	0	1	1	1	1	1	1	1	1	0	1	1	1	1	1	1	1	1	1	0	1	1	1	1	1	1	0	1	1
1	1	1	1	1	1	1	1	1	1	1	1	1	1	1	1	1	1	1	0	1	0	1	1	1	1	1	1	1	1	0	1	1	1	1	1	1	1	1	1	0	0	1	1	1	1	0	0	1	1
1	1	1	1	1	1	1	1	1	1	1	1	1	1	1	1	1	1	1	0	1	0	1	1	1	1	1	1	1	1	0	1	1	1	1	1	1	1	1	1	0	1	1	1	1	1	0	0	1	1
1	1	1	1	1	1	1	1	1	1	1	1	1	1	1	1	1	1	1	0	1	0	1	1	0	1	1	1	1	1	0	1	1	1	1	1	1	1	1	1	0	1	1	1	1	1	0	0	1	1
1	1	1	1	1	1	1	1	1	1	1	1	1	1	1	1	1	1	1	0	1	0	1	1	1	1	1	1	1	1	0	1	1	1	1	1	1	1	1	1	0	1	1	1	1	1	0	0	1	1
1	1	1	1	1	1	1	1	1	1	1	1	1	1	1	1	1	1	1	0	1	0	1	1	1	1	1	1	1	1	0	1	1	1	1	1	1	1	1	1	0	1	1	1	1	1	0	0	1	1
1	1	1	1	1	1	1	1	1	1	1	1	1	1	0	1	1	1	1	0	1	0	1	1	1	1	1	1	1	1	0	1	1	1	0	1	1	1	1	1	0	1	1	1	1	1	0	0	1	1
1	1	1	1	1	1	1	0	1	1	1	1	1	1	1	1	1	1	1	0	1	0	1	1	1	1	1	1	1	1	0	1	1	1	0	1	1	1	1	1	0	1	1	1	1	1	0	0	0	1
1	1	1	1	1	1	1	1	1	1	1	1	1	1	1	1	1	1	1	0	1	0	1	1	1	1	1	1	1	1	0	1	1	1	0	1	1	1	1	1	0	1	1	1	0	1	0	0	1	1
1	1	0	1	1	1	1	1	1	1	1	1	1	1	1	1	1	1	1	0	1	0	1	1	1	1	1	1	1	1	0	1	1	1	0	1	1	1	1	1	0	1	1	1	1	1	0	0	1	1
1	1	1	1	1	1	1	1	1	1	1	1	1	0	1	1	1	1	1	0	1	0	1	1	1	1	1	1	1	1	0	1	1	1	0	1	1	1	1	1	0	1	1	1	1	1	0	0	1	1
1	1	1	1	1	1	1	1	1	1	1	1	1	1	1	1	1	1	1	0	1	0	1	1	1	1	1	1	1	1	1	1	1	1	0	1	1	1	1	1	0	1	1	1	1	1	0	0	1	1
1	1	1	1	1	1	1	1	1	1	1	0	1	1	1	1	1	1	1	0	1	0	1	0	1	1	1	1	1	1	1	1	1	1	0	1	1	1	1	1	0	1	1	1	1	1	0	0	1	1
1	1	1	1	1	1	1	1	1	1	1	1	1	1	1	1	1	1	1	0	1	1	1	1	1	1	1	1	1	1	1	1	1	1	0	1	1	1	1	0	0	1	1	1	1	1	0	0	1	1
1	1	1	1	1	1	1	1	1	1	1	1	1	1	1	1	1	1	1	0	1	1	1	1	1	1	0	1	1	1	1	1	1	1	0	1	1	1	1	1	0	1	1	1	1	1	0	0	1	1
1	1	1	1	1	1	1	1	1	1	1	0	1	1	1	1	1	1	1	0	1	1	1	1	1	1	1	1	1	1	1	1	1	1	0	1	0	1	1	1	0	1	1	1	1	1	0	0	1	1
1	1	1	1	1	1	1	1	1	1	1	1	1	1	1	1	1	1	1	0	0	1	1	1	1	1	1	1	1	1	1	1	1	1	0	1	1	1	1	1	0	1	1	1	1	1	0	0	1	1
1	1	1	1	1	1	1	1	1	1	1	1	1	1	1	1	1	1	1	0	1	1	1	1	1	1	1	1	1	1	1	1	1	1	0	1	1	1	1	1	0	1	1	1	1	0	0	0	1	1
1	1	1	1	1	1	1	1	0	1	1	1	1	1	1	1	1	1	1	0	1	1	1	1	1	1	1	1	1	1	1	1	1	1	0	1	1	1	1	1	0	1	1	1	1	1	0	0	1	1
1	1	1	1	1	1	1	1	1	1	1	1	1	1	1	1	1	1	1	0	1	1	1	1	1	1	1	1	1	1	1	1	1	1	0	1	0	1	1	1	0	1	1	1	1	1	0	0	1	1
1	1	1	1	1	1	1	1	1	1	1	1	1	1	1	1	1	1	1	0	1	1	1	1	1	1	1	1	1	1	1	1	1	1	0	1	0	1	1	1	0	1	1	1	1	1	0	0	1	1
1	1	1	1	1	1	1	1	1	1	1	1	1	1	1	1	1	1	1	1	1	1	1	1	1	1	1	1	1	1	1	1	1	1	0	1	0	1	1	1	0	1	1	0	1	1	0	0	1	1
1	1	1	1	0	1	1	1	1	1	1	1	1	1	1	1	1	1	1	1	1	1	1	1	1	1	0	1	1	1	1	1	1	1	0	1	0	1	1	1	0	1	1	1	1	1	0	0	1	1
1	1	1	1	1	1	1	1	1	1	1	1	1	1	0	1	1	1	1	1	1	1	1	1	1	1	1	1	0	1	1	1	1	1	0	1	0	1	1	1	1	1	1	1	0	1	0	1	1	1
1	1	1	1	1	1	1	1	1	1	1	1	0	1	1	1	1	1	1	1	1	1	1	1	1	1	1	1	1	1	1	1	1	1	0	1	0	1	1	1	1	1	1	1	1	1	0	1	1	0
1	1	1	1	1	1	1	1	1	1	1	1	1	1	1	1	1	1	1	1	1	1	1	1	1	1	1	0	1	1	1	1	1	1	0	1	0	1	1	1	1	1	1	1	1	1	0	1	1	1
1	1	1	1	1	1	1	1	1	1	1	1	1	1	1	1	1	1	1	1	1	0	1	1	1	1	1	1	1	1	1	1	1	1	0	1	0	1	1	1	1	1	1	1	1	1	0	1	1	1
1	1	1	1	1	1	1	1	1	1	1	1	0	1	1	1	1	1	1	1	1	1	1	1	1	1	1	1	1	1	1	1	1	1	0	1	0	1	1	1	1	1	1	0	0	1	0	1	1	1
1	1	1	1	1	1	1	1	1	1	1	1	1	1	1	1	1	1	1	1	1	1	1	1	1	1	1	1	1	1	1	1	1	1	0	1	0	1	1	1	1	1	1	1	0	1	0	1	1	1
1	1	1	1	1	1	1	1	1	1	1	1	1	1	1	1	1	0	1	1	1	1	1	1	1	1	1	1	0	1	1	1	1	1	0	1	0	1	1	1	1	1	1	1	0	1	0	1	1	1
1	1	1	1	1	1	1	1	1	1	1	1	1	1	1	1	1	0	1	1	1	0	1	1	1	1	1	1	1	1	1	1	1	1	0	1	0	1	1	1	1	1	1	1	0	1	0	1	1	1
1	1	1	1	1	1	1	1	1	1	1	1	1	1	1	1	1	0	1	1	1	1	1	1	1	1	1	1	1	1	1	1	1	1	0	1	0	1	1	1	1	1	1	1	0	1	0	1	1	1
1	1	1	1	1	1	1	1	1	1	1	1	1	1	1	1	1	0	1	1	1	1	1	1	1	1	1	1	1	1	1	1	1	1	0	1	0	1	1	1	1	1	1	1	0	1	0	1	0	1
1	1	1	1	1	1	1	1	1	1	1	1	1	1	1	1	1	0	1	1	1	1	1	1	1	1	1	1	1	1	1	1	1	1	0	1	0	1	1	1	1	1	1	1	0	1	0	1	1	1
1	1	0	1	1	1	1	1	1	1	1	1	1	1	1	1	1	1	1	1	1	1	1	1	1	1	1	1	1	1	1	1	1	1	0	1	0	1	1	1	1	1	1	1	0	1	0	1	1	1
1	1	1	1	1	1	1	1	1	1	1	1	1	1	1	1	1	1	1	1	1	1	1	1	1	1	1	1	1	1	1	1	1	1	0	1	0	1	1	1	1	1	1	1	0	1	0	1	1	0
1	1	1	1	1	1	1	1	1	1	1	1	1	1	1	1	1	1	1	0	1	1	1	1	1	1	1	1	1	1	1	1	1	1	0	1	0	1	1	1	1	1	1	1	0	0	0	1	1	1
1	1	1	1	1	1	1	1	1	1	1	1	1	1	1	1	1	1	1	1	1	1	1	1	1	1	1	1	1	1	1	1	1	1	0	1	0	1	1	1	1	1	1	1	0	1	0	1	1	1
1	1	1	1	1	1	1	1	1	1	1	1	1	1	1	1	1	1	1	1	1	1	1	1	1	1	1	1	1	1	1	1	1	1	0	1	0	1	1	1	1	1	1	1	0	1	0	1	1	1
1	1	1	1	1	0	1	1	1	1	1	0	1	1	1	1	1	1	1	1	1	1	1	1	1	1	1	1	1	1	1	1	1	1	0	1	0	1	1	1	1	1	1	1	0	1	0	1	1	1
1	1	1	1	1	1	1	1	1	1	1	1	1	1	1	1	1	1	1	1	1	1	1	0	1	1	1	1	1	1	1	1	1	1	0	1	0	1	1	1	1	1	1	1	0	1	0	1	1	1
1	1	1	1	1	1	1	1	1	1	1	1	1	1	1	1	1	0	1	1	1	1	1	1	0	1	1	1	1	1	1	1	1	1	0	1	0	1	1	1	1	1	1	0	0	1	0	1	1	1
1	1	1	1	1	1	1	1	1	1	1	1	1	1	1	1	1	1	1	1	1	1	1	1	1	1	1	1	1	1	1	1	1	1	0	1	0	1	1	1	1	1	1	1	0	1	0	1	1	1
1	1	1	1	1	1	1	1	1	1	1	1	1	1	1	1	1	1	1	1	1	1	1	1	1	1	1	1	1	1	1	1	1	1	0	1	0	1	1	1	1	1	1	1	0	1	0	1	1	1
1	1	0	1	1	1	1	1	1	1	1	1	1	1	1	1	1	1	1	1	1	1	1	0	1	1	1	1	1	1	1	1	1	1	0	1	0	1	1	1	1	1	1	1	0	1	0	1	1	1
1	1	1	1	1	1	1	1	1	1	1	1	1	1	1	1	1	1	1	1	1	1	1	1	1	1	1	1	1	1	1	1	1	1	0	1	0	1	1	1	1	1	1	1	0	1	0	1	1	1
1	1	1	1	1	1	1	1	1	1	1	1	1	1	1	1	1	1	0	1	1	1	1	1	1	1	1	0	1	1	1	1	1	1	0	1	0	1	1	1	1	1	1	1	0	0	0	1	1	1
1	1	1	1	1	1	1	1	1	1	1	1	1	1	1	1	1	1	0	1	1	1	1	1	1	1	1	1	1	1	1	1	1	1	0	1	0	1	1	1	1	1	1	1	0	0	0	1	1	0
1	1	1	1	1	1	1	1	1	1	1	1	1	1	1	1	1	1	0	1	1	1	1	1	1	1	1	1	1	1	1	1	1	1	0	1	0	1	1	1	1	1	1	1	0	0	0	1	1	1
1	1	1	1	1	0	1	1	1	1	1	1	1	1	1	1	1	0	0	1	1	1	1	1	1	1	1	1	1	1	1	1	0	1	0	1	0	1	1	1	1	1	1	1	0	0	0	1	0	1
1	1	1	1	1	1	1	1	0	1	0	1	1	1	1	1	1	1	0	1	1	1	1	1	1	1	1	1	0	1	1	1	1	1	0	1	0	1	1	1	1	1	1	1	0	0	0	1	1	1
1	1	1	1	1	1	1	1	1	1	1	1	1	1	1	1	1	1	0	1	1	1	1	1	1	1	1	1	1	0	1	1	1	1	0	1	0	1	1	1	1	1	1	1	0	0	0	1	1	1
1	1	1	1	1	1	1	1	1	1	1	0	1	1	1	1	1	1	0	1	1	1	1	1	1	1	1	1	1	1	1	1	1	1	0	1	0	1	1	1	1	1	1	1	0	0	0	1	1	1
1	1	1	1	1	1	0	1	1	1	1	1	1	0	1	1	1	1	0	1	1	1	1	1	1	1	1	1	1	1	1	1	1	1	0	1	0	1	1	1	1	0	1	1	0	0	0	1	1	1
0	1	1	1	1	1	1	1	1	1	1	1	0	1	1	1	1	1	0	1	1	1	1	1	1	1	1	1	1	1	1	1	1	1	0	1	0	1	1	1	1	1	1	1	0	0	0	1	1	1
1	1	1	1	1	1	1	1	1	1	1	1	1	1	1	1	1	1	0	1	1	1	1	0	1	1	1	1	1	1	1	1	1	1	0	1	0	1	1	1	1	1	1	1	0	0	0	1	1	1
1	1	1	1	1	1	1	1	1	1	1	1	1	1	1	1	1	0	0	1	1	1	1	0	1	1	1	1	1	1	1	1	1	1	0	1	0	1	1	1	1	1	1	1	0	0	0	1	1	1
1	1	1	1	1	1	1	1	1	1	1	1	1	1	1	1	1	1	0	1	1	1	1	0	1	1	1	1	1	1	1	1	1	1	0	1	0	1	1	1	1	1	1	1	0	0	0	1	1	1
1	1	1	1	1	1	1	1	1	1	1	1	1	1	1	1	1	1	0	1	1	1	1	0	1	1	1	1	1	1	1	1	1	1	0	1	0	1	1	1	1	1	1	1	0	0	0	1	1	1
1	1	1	1	1	1	1	1	1	1	1	0	1	1	1	1	1	1	0	1	1	1	1	0	1	1	1	1	1	1	1	1	1	1	0	1	0	1	1	1	1	1	1	1	0	0	0	1	1	1
1	1	1	1	1	1	1	1	1	1	1	1	1	1	1	1	1	1	0	1	1	1	1	0	1	1	1	0	1	1	1	1	1	1	0	1	0	1	1	1	1	1	1	1	0	0	0	1	1	1
1	1	1	1	1	1	1	1	1	1	1	1	1	1	1	1	1	1	0	1	1	1	1	0	1	0	0	1	1	1	1	1	0	1	0	1	0	1	1	1	1	1	1	1	0	0	0	1	0	0
1	1	1	1	1	1	1	1	1	1	1	1	1	1	0	1	1	1	0	1	1	1	1	0	1	1	1	1	1	1	1	1	0	1	0	1	0	1	1	1	1	1	1	1	0	0	0	1	1	1
1	1	1	1	1	1	1	1	1	1	1	1	0	1	1	1	1	1	0	1	1	1	1	0	1	1	1	1	1	1	1	1	0	1	1	1	0	1	1	1	1	1	1	1	0	0	0	1	1	1
1	1	1	1	1	1	1	1	1	1	1	1	1	1	1	1	1	1	0	1	1	1	1	0	1	1	1	1	1	1	1	1	0	1	1	1	0	1	1	1	1	1	1	1	0	0	0	1	1	1
1	1	1	1	1	1	1	1	1	1	1	1	1	0	1	1	1	1	0	1	1	1	1	0	1	1	1	1	1	1	1	1	0	1	1	1	0	1	1	1	1	1	1	1	0	0	0	1	1	0
1	1	1	1	1	1	1	1	1	1	1	1	1	1	1	1	1	1	0	1	1	1	1	0	1	1	1	1	1	1	1	1	1	1	1	1	0	1	1	1	1	1	1	1	0	0	0	1	1	1
1	1	1	1	1	1	1	1	1	1	1	1	1	1	1	1	1	1	0	1	1	1	1	0	1	1	1	1	1	1	1	1	1	1	1	1	0	1	1	1	1	1	1	1	0	0	0	1	1	1
1	1	1	1	1	1	1	1	1	1	1	1	1	1	1	1	1	1	0	1	1	1	1	0	1	1	1	1	1	1	1	1	1	1	1	1	0	1	1	1	1	1	1	1	0	0	0	1	1	1
1	1	1	1	1	1	1	1	1	1	1	1	1	1	1	1	1	1	0	1	1	1	1	0	1	0	1	1	1	1	1	1	1	1	1	1	0	1	1	1	1	1	1	1	0	0	0	1	1	1
1	1	1	1	1	1	1	1	1	1	1	1	1	1	1	1	1	1	1	1	1	1	1	0	1	1	1	1	1	1	1	1	1	1	1	1	0	1	1	1	1	1	1	1	1	0	0	1	1	0
1	1	1	1	0	1	1	1	1	1	0	1	1	1	1	1	1	1	1	1	1	1	1	0	1	1	1	1	0	1	1	1	1	1	1	1	0	1	1	1	1	1	1	1	1	0	0	1	1	1
1	1	1	1	1	1	1	1	1	1	1	1	1	1	1	1	1	1	1	1	1	1	1	0	1	1	1	1	1	1	1	1	1	1	1	1	0	1	1	1	1	1	1	1	1	0	0	1	1	1
1	1	1	1	1	0	1	1	1	1	1	1	1	1	1	1	1	1	1	1	1	1	1	0	1	1	1	1	1	1	1	1	1	1	1	1	0	1	1	1	1	1	1	1	1	0	0	1	1	1
1	1	1	1	1	1	1	1	1	1	1	1	1	1	1	1	1	1	1	1	1	1	1	0	1	1	1	1	1	1	1	1	1	1	1	1	0	1	1	1	1	1	1	0	1	0	0	1	0	1
1	1	1	1	1	1	0	1	1	1	1	1	1	1	1	1	1	1	1	1	1	1	1	0	1	0	1	1	1	1	1	1	1	1	1	1	0	1	1	1	1	1	1	1	1	0	0	1	1	1
1	1	1	1	1	1	1	1	1	1	1	1	1	1	1	1	1	1	1	1	1	1	0	0	1	1	1	1	0	1	1	1	1	1	1	1	0	1	1	1	1	1	1	1	1	0	0	1	1	1
1	1	1	1	1	1	1	1	1	1	1	1	1	1	1	1	1	1	0	1	1	1	1	0	1	1	1	1	1	1	1	1	1	1	1	1	0	1	1	1	1	1	1	1	1	0	0	1	1	1
1	1	1	1	1	1	1	1	1	1	1	1	1	1	1	1	1	1	1	1	1	0	1	0	1	1	1	1	1	1	1	1	1	1	1	1	0	1	1	1	1	1	1	1	1	0	0	1	1	1
1	1	1	1	1	1	1	1	1	1	1	1	1	1	1	1	1	1	1	1	1	1	1	0	1	1	1	1	1	1	1	1	1	1	1	1	0	1	1	1	1	1	1	1	1	0	0	1	1	1
1	1	1	1	1	1	1	1	1	1	1	1	1	1	1	1	1	1	1	1	1	1	1	0	1	1	1	0	1	1	1	1	1	1	1	1	0	0	1	1	1	1	1	1	1	0	0	1	1	1
1	1	1	1	1	1	1	1	1	1	1	1	1	1	1	1	1	1	1	1	1	1	1	0	1	1	1	1	1	1	1	1	0	1	1	1	0	1	1	1	1	1	1	1	1	0	0	1	1	1
1	1	1	1	1	1	0	1	1	1	1	1	1	1	1	1	1	1	1	1	1	1	1	0	1	0	1	1	1	1	1	1	1	1	1	1	0	1	1	1	1	1	1	1	1	0	0	1	1	1
1	1	1	1	1	1	1	1	1	1	1	1	1	1	1	1	1	1	1	1	1	1	1	0	1	1	1	1	1	1	1	1	1	1	1	1	0	1	1	1	1	1	1	1	1	0	0	1	1	1
1	1	1	1	1	1	1	1	1	1	1	1	1	1	1	1	1	1	1	1	1	1	1	0	1	1	1	1	1	1	1	1	1	1	1	1	1	1	1	1	1	1	1	1	1	0	0	1	1	1
1	1	1	1	1	1	1	1	1	1	1	1	1	1	1	1	1	1	1	1	1	1	1	0	1	1	0	1	1	1	1	1	1	1	1	1	1	1	1	1	1	1	1	1	1	0	0	1	1	1
1	1	1	1	1	1	1	1	1	1	1	1	1	1	1	1	1	1	1	1	1	1	1	0	1	1	1	1	1	1	1	1	1	1	1	1	1	1	1	1	1	1	1	1	1	0	0	1	1	1
1	1	1	1	1	1	1	1	1	1	1	1	1	1	1	1	1	1	1	1	1	1	1	0	0	1	1	1	1	1	1	1	1	1	1	1	1	1	1	1	1	1	1	1	1	0	0	1	1	1
1	1	1	1	1	1	1	1	1	1	1	1	1	1	1	1	1	1	1	1	1	1	1	0	1	1	1	1	1	1	1	1	1	1	1	1	1	1	1	1	1	1	1	1	1	0	0	1	1	1
1	1	1	1	1	1	1	1	1	1	1	1	1	1	1	1	1	0	1	1	1	1	1	0	1	1	1	1	1	1	1	1	1	1	1	1	1	1	1	1	1	1	1	1	1	0	0	1	1	1
1	1	1	1	1	1	1	1	1	1	1	1	1	1	1	1	1	0	1	1	1	1	1	0	1	1	1	1	1	1	1	1	1	1	1	1	1	1	1	1	1	1	1	1	1	0	0	1	1	1
1	1	1	1	1	1	1	1	1	1	1	1	1	1	1	1	1	0	1	1	1	1	1	0	1	1	1	1	1	1	1	1	1	1	1	1	1	1	1	1	1	1	1	1	1	0	0	1	1	1
1	1	1	1	1	1	1	1	1	1	1	1	1	1	1	1	1	0	1	1	1	1	1	0	1	1	1	1	1	1	1	1	1	1	1	1	1	1	1	1	1	1	1	1	1	0	0	1	1	1
1	1	1	1	1	1	1	1	1	1	1	1	1	1	1	1	1	0	1	1	1	1	0	0	0	1	1	1	1	1	1	1	1	1	1	1	1	1	1	1	1	1	1	1	1	0	0	1	1	1
1	1	1	1	1	1	1	1	1	1	1	0	1	1	1	1	1	0	1	1	1	1	1	0	1	0	1	1	1	1	1	1	1	1	1	1	1	1	1	1	1	1	1	1	1	0	0	1	1	1
1	1	1	1	1	1	1	1	1	1	1	1	1	1	1	1	1	0	1	1	1	1	1	0	1	1	1	1	1	1	1	1	1	1	1	1	0	1	1	1	1	1	1	1	1	0	0	1	1	1
1	1	1	1	1	1	1	1	1	1	1	1	1	1	1	1	1	0	1	1	1	1	1	0	0	1	1	1	1	1	1	1	1	1	1	1	1	1	1	1	1	1	0	1	1	0	0	1	1	1
1	1	1	1	1	1	1	1	1	1	1	1	1	1	1	1	1	0	1	1	1	1	1	0	1	1	1	1	1	1	1	1	1	1	1	1	1	1	1	1	1	1	0	1	1	0	0	1	1	1
1	1	1	1	1	1	1	1	1	1	1	1	1	1	1	1	1	0	1	1	1	1	1	0	1	1	1	1	1	1	1	1	1	1	1	1	1	1	1	1	1	1	0	1	1	0	0	1	1	1
1	1	1	1	0	1	1	1	1	1	1	1	1	1	1	1	1	0	1	1	1	1	1	0	1	1	1	1	1	1	1	1	1	1	1	1	1	1	1	1	1	1	0	1	1	0	0	1	1	0
1	1	1	1	1	1	1	1	1	1	1	1	1	1	1	1	1	0	1	1	1	1	1	0	1	1	1	1	1	1	1	1	1	1	1	1	1	1	1	1	1	1	0	1	1	0	0	1	1	1
1	1	1	1	1	1	1	1	1	1	1	1	1	1	1	1	1	0	1	1	1	1	1	0	1	1	1	1	1	1	1	1	1	1	1	1	1	1	1	1	1	1	0	1	1	0	0	1	1	1
1	1	1	1	1	1	1	1	1	1	1	1	1	1	1	1	1	0	1	1	1	1	0	0	0	1	1	1	1	1	1	1	1	1	1	1	1	1	1	1	1	1	0	1	1	0	0	1	1	1
1	1	1	1	1	1	1	0	1	0	1	1	1	1	1	1	1	0	1	1	1	1	1	0	1	1	1	1	1	1	1	1	1	1	1	1	1	1	1	1	1	1	1	1	1	0	0	1	1	1
1	1	1	1	1	1	1	1	1	1	1	1	1	1	1	1	1	0	1	0	1	1	1	0	1	1	1	1	1	1	1	1	1	1	1	1	1	1	1	1	1	1	1	1	1	0	0	1	1	1
1	1	1	1	1	1	1	1	1	1	1	1	0	1	0	1	1	0	1	1	1	1	1	0	1	1	1	1	1	1	1	1	1	1	1	1	1	1	1	1	1	1	1	1	1	0	0	1	1	1
1	1	1	1	1	1	1	1	1	1	1	1	1	1	1	1	1	0	1	1	1	1	1	0	1	1	1	1	1	1	1	1	1	1	1	1	1	1	1	1	1	1	1	1	1	0	0	1	1	1
1	1	1	1	1	1	1	1	1	1	1	1	1	1	1	1	1	0	1	1	1	1	0	0	1	1	1	1	1	1	1	1	1	1	1	1	1	1	1	1	1	1	1	1	1	0	0	1	1	1
1	1	1	1	1	1	1	1	1	1	1	1	1	1	0	1	1	0	1	1	1	1	1	0	1	1	1	1	1	1	1	1	1	1	1	1	1	1	1	1	1	1	1	1	1	0	0	1	1	1
1	1	1	1	1	1	1	1	1	1	1	1	1	1	1	1	1	0	1	1	1	1	1	0	1	1	1	1	1	1	1	1	1	1	1	1	1	1	1	1	0	1	1	1	1	0	1	1	1	1
1	1	1	1	1	1	1	1	1	1	1	1	1	1	1	1	1	0	1	1	1	1	0	0	1	1	1	1	1	1	1	1	1	1	1	1	1	1	1	1	1	1	1	1	1	0	1	1	1	1
1	1	1	1	1	1	1	1	1	1	1	1	1	1	1	1	1	0	1	1	1	1	0	0	1	1	1	1	1	1	1	1	1	1	1	1	1	1	1	1	1	1	1	1	0	0	1	0	1	1
1	1	1	1	1	1	1	1	1	1	1	1	1	1	1	1	1	0	1	1	1	1	0	0	1	1	1	1	1	1	1	1	1	1	1	1	1	1	1	1	1	1	1	1	1	0	1	1	1	1
1	1	1	1	1	1	1	1	1	1	1	1	1	1	1	1	1	0	1	1	1	1	0	0	1	1	1	1	1	1	1	1	1	1	1	1	1	1	1	1	1	1	1	1	1	0	1	1	1	1
1	1	1	1	1	1	1	1	1	1	1	1	1	1	1	1	1	0	1	1	1	1	0	0	0	1	1	1	1	1	1	1	1	1	1	1	1	1	1	1	1	1	1	1	1	0	1	1	1	1
1	1	1	1	1	1	1	1	1	1	1	1	1	1	1	1	1	1	1	1	1	1	0	0	1	1	1	1	1	1	1	1	1	1	1	1	1	1	1	1	1	1	1	1	1	0	1	1	1	1
1	1	1	1	1	1	1	1	1	1	1	1	1	1	1	1	1	1	1	1	1	1	0	0	1	1	1	1	1	1	1	1	1	1	1	1	1	1	1	1	1	1	1	1	1	0	1	1	1	1
1	1	1	1	1	0	1	1	1	1	1	1	1	1	1	1	1	1	1	1	1	1	0	0	0	1	1	1	1	1	1	1	1	1	1	1	1	1	1	1	1	1	1	1	1	0	0	1	1	1
1	1	1	1	1	1	1	1	1	1	1	1	1	1	1	1	1	1	1	1	1	1	0	0	1	1	1	1	1	1	1	1	1	1	1	1	1	1	1	1	1	1	1	1	1	0	1	1	1	1
1	1	1	1	1	1	1	1	1	1	1	1	1	1	1	1	1	1	1	1	1	1	0	0	1	1	1	1	1	1	1	1	1	1	1	1	1	1	1	1	1	1	1	1	1	0	1	1	1	1
1	1	1	1	1	1	0	1	1	1	1	1	1	1	1	1	1	1	1	1	1	1	0	0	1	1	1	1	1	1	1	1	1	1	1	1	1	1	1	1	1	1	1	1	1	0	1	1	1	1
1	1	1	1	1	1	1	1	1	1	1	1	1	1	1	1	1	1	1	1	1	1	0	0	1	1	1	1	1	1	1	1	1	1	1	1	1	1	1	1	1	1	1	1	1	1	1	1	1	1
1	1	1	1	1	1	1	1	1	1	1	1	1	1	1	1	1	1	1	1	1	1	0	0	1	1	1	1	1	1	1	1	1	1	0	1	1	0	1	1	1	1	1	1	1	1	1	0	1	1
1	1	1	1	1	1	1	1	1	1	1	1	1	1	1	1	1	1	1	1	1	1	0	0	1	1	1	1	1	0	1	1	1	1	1	1	1	1	1	1	1	1	1	1	1	1	1	1	1	1
1	1	1	1	1	1	0	1	1	1	1	1	1	1	1	1	1	1	1	1	1	1	0	0	1	1	1	1	1	1	1	1	1	1	1	1	1	1	1	1	1	1	1	1	1	1	1	1	1	1
1	1	1	1	1	1	1	1	1	1	1	1	1	1	1	1	1	1	1	1	1	1	0	0	1	1	1	1	1	1	1	1	1	1	1	1	1	0	1	1	1	1	1	1	1	1	1	1	1	1
1	1	1	1	1	1	1	1	1	1	1	1	1	1	1	1	1	1	1	1	1	1	0	0	1	1	1	1	1	1	1	1	1	1	1	1	1	1	1	1	1	1	1	1	1	1	1	1	1	1
1	1	1	1	1	1	1	1	1	1	1	1	1	1	1	1	1	1	1	1	1	1	0	0	1	1	1	1	1	1	1	1	1	1	1	1	1	1	1	1	1	1	1	1	1	1	1	1	1	1
1	1	1	1	1	1	1	1	1	1	1	1	1	1	1	1	0	1	1	1	1	1	0	0	1	1	1	1	1	1	1	1	1	1	1	1	1	1	1	1	1	1	1	1	0	1	1	1	1	1
1	1	1	1	1	1	1	1	1	1	1	1	1	1	1	1	1	1	1	1	1	1	0	0	1	1	1	1	1	1	1	1	1	1	1	1	1	1	1	1	1	1	1	1	1	1	1	1	1	1
1	1	1	1	1	1	1	0	1	1	1	1	1	1	1	1	1	1	1	1	1	1	0	0	1	1	1	1	1	1	1	1	1	1	1	1	1	1	1	1	1	1	1	1	1	1	1	1	1	1
1	1	1	1	1	1	1	1	1	1	0	1	1	1	1	1	0	1	1	1	1	1	0	0	1	1	1	1	1	1	1	1	1	1	1	1	1	1	1	1	1	1	1	1	0	1	1	1	1	1
1	1	1	1	1	1	1	1	1	1	1	1	1	1	1	1	1	1	1	1	1	1	0	0	1	1	1	1	1	1	1	1	1	1	1	1	1	1	1	1	1	1	1	1	1	1	1	1	1	1
1	1	1	1	1	1	1	1	1	1	1	1	1	1	1	1	1	1	1	1	1	1	1	0	1	1	1	1	0	1	1	1	1	1	1	1	1	1	1	1	1	1	1	1	1	1	1	1	1	1
1	1	1	1	1	1	1	1	1	1	1	1	1	1	1	1	1	1	1	1	1	1	1	0	1	1	1	1	1	1	1	1	1	1	1	1	1	1	1	0	1	1	1	1	1	1	1	1	1	1
1	1	1	1	1	1	1	1	1	1	1	1	1	1	1	1	1	1	1	1	0	1	1	0	1	1	1	1	1	1	1	1	1	1	1	1	1	1	1	1	1	1	1	1	1	1	1	1	1	1
1	1	1	1	1	1	1	1	0	1	1	1	1	1	1	1	1	1	1	1	1	1	1	0	1	1	1	1	1	1	1	1	1	1	1	1	1	1	1	1	1	1	1	1	1	1	0	1	1	1
1	1	1	1	1	1	1	1	1	1	1	1	1	1	1	1	1	1	1	1	1	1	1	0	1	1	1	1	1	1	1	1	1	1	1	1	1	1	1	1	1	1	1	0	1	1	1	1	1	1
1	1	1	1	1	1	1	1	1	1	1	1	1	1	1	1	1	1	1	1	1	1	1	0	1	1	1	1	1	1	1	1	1	1	1	1	1	1	1	1	1	1	1	0	0	1	1	1	1	1
1	1	1	1	1	1	1	1	1	1	1	1	1	1	1	1	1	1	1	1	1	1	1	0	1	1	1	1	1	1	1	1	1	1	1	1	1	1	1	1	1	1	1	0	0	1	1	1	1	1
1	1	1	1	1	1	1	1	1	1	1	1	1	1	0	1	1	1	1	1	1	1	1	0	1	1	1	0	0	1	1	1	1	1	1	1	1	1	1	1	1	1	1	0	0	1	1	1	1	1
1	1	1	1	1	1	1	1	1	1	1	1	1	1	1	1	1	1	1	1	1	1	1	0	1	1	1	1	1	1	1	1	1	1	1	1	1	1	1	1	1	1	1	0	0	1	1	1	1	1
1	1	1	1	1	1	1	1	1	1	1	1	1	1	1	1	1	1	1	1	1	0	1	0	1	1	1	1	1	1	1	1	1	1	1	1	1	1	1	1	1	1	1	0	0	1	0	1	1	1
1	1	1	1	1	1	1	1	1	1	1	1	1	1	1	1	1	1	1	1	1	1	1	1	1	1	1	1	1	1	0	1	1	1	1	1	1	1	1	1	1	1	1	0	0	1	1	1	1	1
1	1	1	1	1	1	1	1	1	1	1	1	1	1	1	1	1	1	1	1	1	1	1	1	1	1	1	1	1	0	1	1	1	1	1	1	1	1	1	1	1	1	1	0	0	1	1	1	1	1
1	1	1	1	1	1	1	1	1	1	1	1	1	1	1	1	1	1	1	0	1	1	1	1	1	1	1	1	1	1	1	1	1	1	1	1	1	1	1	1	1	1	1	0	0	1	1	1	0	1
1	1	1	1	1	1	1	1	1	1	1	1	1	1	1	1	1	1	1	1	1	1	1	1	1	1	1	1	1	1	1	1	1	1	1	1	1	1	1	1	1	1	1	0	0	1	1	1	1	1
1	1	1	1	1	1	1	1	1	1	1	1	1	1	1	1	1	1	1	1	1	1	1	1	0	1	1	1	1	1	1	1	1	1	1	1	1	0	1	1	1	0	1	0	0	1	1	1	1	1
1	1	1	1	1	1	1	1	1	1	1	1	1	1	1	1	1	1	1	1	1	1	1	1	1	1	1	1	0	1	1	1	1	1	1	1	1	1	1	1	1	0	1	0	0	1	1	1	1	1
1	1	1	0	1	1	1	1	1	1	1	1	1	1	1	1	1	1	1	1	1	1	1	1	1	1	1	0	1	1	1	1	0	1	1	1	1	1	1	1	0	0	1	0	0	1	1	1	1	1
1	1	1	1	1	1	1	1	1	1	1	0	1	1	1	1	1	1	1	1	1	1	1	1	1	1	1	1	1	1	1	1	1	1	1	1	1	1	1	1	1	0	1	0	0	1	1	1	1	1
1	1	1	1	0	1	1	1	1	1	1	1	1	1	1	1	1	1	1	1	1	1	1	0	1	1	1	1	1	1	1	1	1	1	1	1	1	1	1	1	1	0	0	0	1	1	1	1	1	1
1	1	1	1	1	1	1	1	1	1	0	1	1	1	1	1	1	1	1	1	1	1	1	1	1	1	1	1	1	1	1	1	1	1	1	1	0	1	1	1	1	0	1	0	1	1	1	1	1	1
1	1	1	1	1	1	0	1	1	1	1	1	1	1	0	0	1	1	1	1	1	1	1	1	1	1	1	1	1	1	1	1	1	1	1	1	1	1	1	1	1	0	1	0	1	1	1	1	1	1
1	1	1	1	1	1	1	1	1	1	1	1	1	1	1	1	1	1	1	1	1	1	1	1	1	1	1	0	1	1	1	1	1	1	1	1	1	1	1	1	1	0	1	0	1	1	1	1	1	1
1	1	1	1	1	1	1	1	1	1	1	1	1	1	1	1	0	1	1	1	1	1	1	1	1	1	1	1	1	1	1	1	1	1	1	1	0	1	1	1	1	0	1	0	1	1	1	1	1	0
1	1	1	1	1	1	1	1	1	1	1	1	1	1	1	1	1	1	1	1	1	0	0	1	1	1	1	1	1	1	1	0	1	1	1	1	1	1	1	1	1	0	1	0	1	1	1	1	1	1
1	1	1	1	1	1	1	1	1	1	1	1	1	1	1	1	1	1	1	1	1	0	1	1	1	1	1	1	1	1	1	1	1	1	1	1	1	1	1	1	1	0	1	0	1	1	1	1	1	1
1	1	1	1	1	1	1	1	1	1	1	1	1	1	1	1	1	1	1	1	1	0	1	1	1	1	1	1	1	1	1	1	1	1	1	1	1	1	1	1	1	0	1	0	1	1	1	1	1	1
1	1	1	1	1	1	1	1	1	1	0	1	1	1	1	1	1	1	1	1	1	0	1	1	1	1	1	1	1	1	1	1	1	1	1	1	1	1	1	1	1	0	1	0	1	1	1	1	1	1
1	1	1	1	1	1	1	1	1	1	0	1	1	1	1	1	1	1	1	1	1	0	1	1	1	1	1	1	1	1	1	1	1	1	1	1	1	1	1	1	1	0	1	0	1	1	1	1	1	1
1	1	1	1	1	1	1	1	1	1	0	1	1	1	1	1	1	1	1	1	1	0	1	1	1	1	1	1	1	1	1	1	1	1	1	1	1	1	1	1	1	0	1	0	1	1	1	1	1	1
1	1	1	1	1	1	1	1	1	1	0	1	1	1	1	1	1	1	1	1	1	0	1	1	1	1	1	1	1	1	1	1	1	1	1	1	1	1	1	1	1	0	1	0	1	1	1	1	1	1
1	1	1	1	1	1	1	1	1	1	0	1	1	1	1	1	1	1	1	1	1	0	1	1	1	1	1	0	1	1	0	1	1	1	1	1	1	1	1	1	1	0	1	0	1	1	1	1	1	1
1	1	1	1	1	1	1	1	1	1	0	1	1	1	0	1	1	1	1	1	1	0	1	1	1	1	1	1	0	1	1	1	1	1	1	1	1	1	1	1	1	0	1	0	1	1	1	1	1	1
1	1	1	1	1	1	1	1	1	1	0	1	1	1	1	1	1	1	1	1	1	0	1	1	1	1	1	1	1	1	1	1	1	1	1	1	1	1	1	1	1	0	1	0	1	1	1	1	1	1
1	1	1	1	1	1	1	1	1	1	0	1	1	0	1	1	1	1	1	1	1	0	1	1	1	1	1	1	1	1	1	1	1	1	1	1	1	1	1	1	1	0	1	0	1	1	1	1	1	1
1	1	1	1	1	1	1	1	1	1	0	1	1	1	1	1	1	1	0	1	1	0	1	1	1	1	1	1	1	1	1	1	1	1	1	1	1	1	1	1	1	0	1	0	1	1	1	1	1	1
1	1	0	1	1	1	0	1	1	1	0	1	1	1	1	1	1	1	1	1	1	0	1	1	1	1	1	1	1	1	1	1	1	1	1	1	1	1	1	1	1	0	1	0	1	1	1	1	1	1
0	1	1	1	1	1	1	1	1	1	0	1	1	1	1	1	1	1	1	1	1	0	1	1	1	1	1	1	1	1	1	1	1	1	1	1	1	1	1	1	1	0	1	0	1	1	1	1	1	1
1	1	1	1	1	1	1	0	1	1	0	1	1	1	1	1	1	1	1	1	1	0	1	1	1	1	1	1	1	1	1	1	1	1	1	1	1	1	1	1	1	0	1	0	1	1	1	1	1	1
1	1	1	1	1	1	1	1	1	1	0	1	1	1	1	1	1	1	1	1	1	0	0	1	1	1	1	1	1	1	1	1	1	1	1	1	1	1	1	1	1	0	1	0	1	1	1	1	1	1
1	1	1	1	1	1	1	1	1	1	0	1	1	1	1	1	1	1	1	1	1	0	1	1	1	1	1	1	1	0	1	0	1	1	1	1	1	1	1	1	1	0	1	0	1	1	1	1	1	1
1	1	1	0	1	1	1	1	1	1	0	1	1	1	1	1	1	1	1	1	1	0	1	1	1	1	1	1	1	1	1	1	1	1	1	1	1	1	1	1	0	0	1	0	1	1	1	1	1	1
1	1	1	1	1	1	1	1	0	1	0	1	1	1	1	1	1	1	1	1	1	0	1	1	1	1	1	1	1	1	1	1	1	1	1	0	1	1	1	1	1	0	1	1	1	1	1	1	1	1
1	1	1	1	1	1	1	0	1	1	0	1	1	1	1	1	1	1	1	1	1	0	0	1	1	1	1	1	1	1	1	1	1	1	1	1	1	1	1	1	1	0	1	1	1	0	1	1	1	1
1	1	1	1	1	1	1	0	1	1	0	1	1	1	1	1	1	1	1	1	1	0	1	1	1	1	1	1	1	1	1	1	1	1	1	1	1	1	1	1	1	0	1	1	1	1	1	1	1	1
1	1	1	1	1	1	1	0	0	1	0	1	1	1	1	1	1	1	1	1	0	0	1	1	1	1	1	1	1	1	1	1	1	1	1	1	1	1	1	1	1	0	1	1	1	1	1	1	1	1
1	1	1	1	1	1	1	0	1	1	0	1	1	1	1	1	1	1	1	1	1	0	1	1	1	1	1	1	1	1	1	1	1	1	1	1	1	1	1	1	1	0	1	1	1	1	1	1	1	1
1	1	1	1	1	1	1	0	1	1	0	1	1	1	1	1	1	1	1	1	1	0	1	1	1	1	1	1	0	1	1	1	1	1	1	1	1	1	1	1	1	0	1	1	1	0	1	1	1	1
1	1	1	1	1	1	1	0	1	1	0	1	1	1	1	1	1	1	1	1	0	0	1	1	1	1	1	1	1	1	1	1	1	1	1	1	1	1	1	1	1	0	1	1	1	0	1	1	1	1
1	1	1	1	1	1	1	0	1	1	0	1	1	1	1	1	1	1	1	1	1	0	1	1	1	1	1	1	1	1	1	1	1	1	1	1	1	1	1	1	0	0	1	1	1	0	1	1	1	1
1	1	1	1	1	1	0	0	1	1	1	1	1	1	1	1	1	1	1	1	1	0	1	1	1	1	1	1	1	1	1	1	1	1	1	1	1	1	1	1	1	0	1	1	1	0	1	1	1	1
1	1	1	1	1	1	1	0	1	1	1	1	1	1	0	1	1	1	1	1	1	0	1	1	1	1	1	1	0	1	1	1	1	1	1	1	1	1	1	1	1	0	1	1	1	0	1	0	1	1
1	1	1	1	1	1	1	0	1	1	1	1	1	1	1	1	1	1	1	1	1	0	1	1	1	1	1	0	1	1	1	1	1	1	1	1	1	1	1	1	1	0	1	1	1	0	1	1	1	1
1	1	1	1	1	1	1	0	1	1	1	0	1	1	1	1	0	1	1	1	1	0	1	1	1	1	1	1	1	1	1	1	1	1	1	1	1	1	1	1	1	0	1	1	1	0	1	1	1	1
1	1	1	1	1	1	1	0	1	1	1	1	1	0	1	1	0	1	1	1	0	0	1	1	1	1	1	1	1	1	1	1	1	1	1	1	1	1	1	1	0	0	1	1	1	0	1	1	1	1
0	1	1	1	1	1	1	0	1	1	1	1	1	1	1	1	0	1	1	1	1	0	1	1	1	1	1	1	0	1	1	1	1	1	1	1	1	1	1	1	1	0	1	1	1	1	1	1	1	1
1	1	1	1	1	1	1	0	1	1	1	1	1	1	1	1	0	1	0	1	1	0	1	1	1	1	1	1	1	1	1	1	1	1	1	1	1	1	1	1	1	0	1	1	1	1	1	1	1	1
1	1	1	1	1	0	1	0	1	1	1	1	1	1	1	1	0	1	1	1	1	0	1	1	1	1	1	1	1	1	1	1	1	1	1	1	1	1	1	1	1	0	1	1	1	1	1	1	1	1
1	1	1	1	1	1	1	0	1	1	1	1	1	1	1	1	0	1	1	1	1	0	1	1	1	1	1	1	1	1	1	1	1	1	1	1	1	1	1	1	1	0	1	1	1	0	1	1	1	1
1	1	1	1	0	1	1	0	1	1	1	1	1	1	1	1	0	1	1	1	1	0	1	1	1	1	1	1	1	1	1	1	1	1	1	1	1	1	0	0	1	0	1	1	1	1	1	1	1	1
1	1	1	1	1	1	1	1	1	1	1	1	1	1	1	1	0	1	1	1	1	0	1	1	1	1	1	1	1	1	1	1	1	1	1	1	1	1	1	1	1	0	1	0	1	1	1	1	0	1
1	1	1	1	1	1	1	1	1	1	1	1	1	1	1	1	0	0	1	1	1	0	1	0	1	1	1	1	1	1	1	1	1	1	1	1	1	1	1	1	1	0	1	1	1	1	1	1	1	1
1	1	1	1	1	1	1	1	1	1	1	1	1	1	1	1	1	1	1	1	1	0	1	1	1	1	1	1	1	1	1	1	1	1	1	1	1	1	1	1	1	0	1	1	1	1	1	1	1	1
1	1	1	1	1	1	1	1	1	1	1	0	1	1	1	1	1	1	1	1	1	0	1	1	1	1	1	1	1	0	1	1	1	1	1	1	1	1	1	1	1	0	1	1	1	1	1	1	1	1
1	1	1	0	1	1	1	1	1	1	1	1	1	1	1	1	1	0	1	1	1	0	1	1	1	1	1	1	1	0	1	1	1	1	1	1	1	1	1	1	1	0	1	1	1	1	1	1	1	1
1	1	1	1	1	0	1	1	1	1	1	1	1	1	1	1	1	1	0	1	1	0	1	1	1	1	1	1	1	0	1	1	1	1	1	1	1	1	1	1	1	0	1	1	1	1	1	1	1	1
1	1	1	1	1	1	1	1	1	1	1	1	1	1	1	1	1	1	1	1	1	0	1	0	1	1	1	1	1	0	1	1	1	1	1	1	1	1	1	1	1	0	1	1	1	0	1	1	1	1
1	1	1	1	1	1	1	1	1	1	1	0	1	1	1	1	1	1	1	1	0	0	1	1	1	1	1	1	1	2	1	1	1	1	1	1	1	1	1	1	1	0	1	1	1	1	1	1	1	1
1	1	1	1	1	1	1	0	1	1	1	0	1	1	1	1	1	1	0	1	1	0	1	1	1	1	1	1	1	2	1	1	1	1	1	0	1	1	1	1	1	0	1	1	1	1	1	1	1	1
1	1	1	1	1	1	1	1	1	1	1	0	1	1	1	1	0	1	1	1	1	0	1	1	1	1	1	1	1	2	1	1	1	1	1	1	1	0	1	1	1	0	1	1	1	1	1	1	0	1
1	1	1	1	1	1	1	1	1	1	1	0	1	0	1	1	1	1	1	1	1	0	1	1	1	1	1	1	1	2	1	1	1	1	1	1	1	1	1	1	1	0	1	1	1	1	1	1	1	1
1	1	1	1	1	1	1	0	1	1	1	0	1	1	1	1	1	1	1	1	0	0	1	1	1	1	1	1	1	2	1	1	1	1	1	1	1	1	1	1	1	0	1	1	1	1	1	1	1	1
1	1	1	1	1	0	1	1	1	1	1	0	1	1	1	1	1	1	1	1	0	0	1	1	1	1	1	1	1	2	1	1	1	1	1	1	1	1	1	1	1	0	0	0	1	1	1	1	1	1
1	1	1	1	1	1	1	1	1	1	1	0	1	1	1	1	1	1	1	0	0	0	1	1	1	1	1	1	1	2	1	1	1	1	1	1	1	1	1	1	1	0	1	1	1	1	1	0	1	1
1	1	1	1	1	1	1	1	1	1	1	0	1	1	1	1	1	1	1	1	0	0	1	1	1	1	1	1	1	2	1	1	1	1	1	1	1	1	1	1	1	0	1	1	1	1	1	1	1	1
1	1	1	1	1	0	1	1	1	1	1	0	1	1	1	1	1	1	1	1	0	0	1	1	1	1	1	1	1	2	1	1	1	1	1	1	1	1	1	1	1	0	1	1	1	1	1	1	1	1
1	1	1	1	1	1	1	1	1	1	1	0	1	1	1	1	1	1	1	1	0	0	1	1	1	1	1	1	1	2	1	1	1	1	0	1	1	1	1	1	1	0	1	1	1	1	1	1	1	1
1	1	1	1	1	1	1	1	1	1	1	0	1	1	1	1	1	1	1	1	0	0	1	1	1	1	1	1	1	2	1	1	1	1	1	1	1	1	1	1	1	0	1	1	1	1	0	1	1	1
1	1	1	1	1	1	1	1	1	0	1	0	1	1	1	1	1	1	1	1	0	0	1	1	1	1	1	1	1	2	1	1	1	1	1	1	1	1	0	0	1	0	1	1	1	1	1	1	0	1
1	1	1	1	1	1	1	1	1	1	1	0	1	1	1	1	1	1	1	1	0	0	1	1	1	1	1	1	1	2	1	1	1	1	1	1	0	1	0	1	1	0	1	1	1	1	1	1	0	1
1	1	1	1	1	0	1	1	1	1	1	0	1	0	1	1	1	1	1	1	0	0	1	1	1	1	1	1	1	2	1	1	1	1	1	1	1	1	0	1	1	0	1	1	1	1	1	1	0	1
1	1	1	1	1	0	1	1	1	1	1	0	1	1	1	1	1	1	1	1	0	0	1	1	1	1	1	1	1	2	1	1	1	1	1	1	1	1	0	1	1	0	1	1	1	1	1	1	0	1
1	1	1	1	1	0	1	1	1	1	1	0	1	1	1	1	1	1	1	1	0	0	1	1	1	1	1	1	1	2	1	1	1	1	1	1	1	1	0	1	1	0	1	1	1	1	1	1	0	1
1	1	1	1	1	0	1	1	1	1	1	2	1	1	1	1	1	1	1	1	0	0	1	1	1	1	1	1	1	2	1	1	1	1	1	1	1	1	0	1	1	0	1	1	1	1	1	1	0	1
1	1	1	1	1	0	1	1	1	1	1	2	1	1	1	1	1	1	1	1	0	0	1	1	1	1	1	1	1	2	1	1	1	1	1	1	1	1	0	1	1	0	1	1	1	1	0	1	0	1
0	1	1	1	1	0	1	1	1	1	1	2	1	1	1	1	1	1	1	1	0	0	1	1	1	1	1	1	1	2	1	1	1	1	1	1	1	1	0	1	1	0	1	1	1	1	1	1	0	0
1	0	1	1	1	0	1	1	1	1	1	2	1	1	1	1	1	1	1	1	0	0	1	1	1	1	0	1	1	2	1	1	1	1	1	1	1	1	0	1	1	0	1	1	0	1	1	1	0	1
1	1	1	1	1	0	1	1	1	1	1	2	1	1	1	1	1	1	1	1	0	0	1	1	1	1	1	1	1	2	1	1	1	1	1	1	1	1	0	1	1	0	0	1	1	1	0	1	1	1
1	1	1	1	1	0	1	1	1	1	1	2	1	1	1	1	1	1	1	1	0	0	1	1	1	1	1	1	1	2	1	1	1	1	1	1	1	1	0	1	1	0	1	1	1	1	1	1	1	1
1	1	1	1	1	0	1	1	1	1	1	2	1	1	1	1	1	1	1	1	0	0	0	1	1	1	1	1	1	2	0	1	1	1	1	1	1	1	0	1	1	0	1	1	1	1	1	1	1	1
1	1	1	1	1	0	1	1	1	1	1	2	1	1	1	1	1	1	1	1	0	0	1	1	1	1	1	1	1	2	1	1	1	1	1	1	1	1	0	1	1	0	1	1	1	1	1	1	1	1
1	1	1	1	1	0	1	1	1	1	1	2	1	1	1	1	1	1	1	1	0	0	1	1	1	1	1	1	1	2	1	1	1	1	1	1	1	1	0	1	0	0	1	1	0	1	1	1	1	1
1	0	1	1	0	0	1	1	1	1	1	2	0	0	1	1	1	1	1	1	0	0	1	1	1	1	0	1	1	2	1	1	1	1	1	1	1	0	0	1	1	0	1	1	0	1	1	0	1	1
1	1	1	1	1	0	1	1	1	1	1	2	1	1	1	1	1	1	1	1	0	0	1	1	1	1	1	1	1	2	1	1	1	1	1	1	1	1	0	1	1	0	1	1	0	1	0	1	1	1
1	1	1	1	1	0	1	1	1	1	1	2	1	1	1	1	1	1	1	1	0	0	1	1	1	1	1	1	1	2	1	1	1	1	1	1	1	1	0	1	1	0	1	0	0	1	1	1	1	1
1	1	1	1	1	0	1	1	1	1	1	2	1	1	1	1	1	1	1	1	2	0	1	1	1	1	1	1	1	2	1	1	1	1	1	1	1	1	0	1	1	0	1	1	0	1	1	1	1	1
1	1	1	1	1	0	1	1	1	1	1	2	1	1	1	1	1	1	1	1	2	0	1	1	1	1	1	1	1	2	1	1	1	1	1	1	1	1	0	1	0	0	1	1	0	1	1	1	1	1
1	1	1	1	1	0	1	1	1	1	1	2	1	1	1	1	1	1	1	1	2	0	1	1	1	1	1	1	1	2	1	1	1	1	1	1	1	1	0	0	0	0	1	1	0	1	1	1	1	1
1	1	1	1	0	0	1	1	1	1	1	2	1	0	1	1	1	1	1	1	2	0	1	1	1	1	1	1	1	2	1	1	1	1	1	1	1	1	0	1	0	0	1	0	0	1	0	1	1	1
0	1	1	1	1	0	1	1	1	0	1	2	1	1	1	1	1	1	1	1	2	0	1	1	1	1	1	1	1	2	1	1	1	1	1	1	1	1	0	1	0	0	1	1	0	0	0	1	1	0
1	1	1	1	1	0	1	1	1	1	1	2	1	1	1	1	1	1	1	1	2	0	1	0	1	1	1	1	1	2	1	1	1	1	1	1	1	1	0	1	0	0	1	1	0	1	0	1	1	1
1	1	1	1	1	0	1	1	1	1	1	2	1	1	1	1	1	1	1	1	2	0	1	1	1	1	0	0	1	2	1	1	1	1	1	1	1	1	0	1	0	0	1	1	1	1	0	1	1	1
1	1	1	1	1	0	1	1	1	1	1	2	1	1	1	1	1	1	1	1	2	0	1	1	1	1	1	1	1	2	1	1	1	1	1	1	1	1	0	1	0	0	1	0	1	1	0	1	1	1
1	1	1	1	1	0	1	1	1	1	1	2	1	1	1	1	1	1	1	1	2	0	1	1	1	1	1	1	1	2	0	1	1	1	1	1	1	1	0	1	0	0	1	1	1	1	0	1	1	1
1	1	1	1	1	0	1	1	1	1	1	2	1	0	1	1	1	1	1	1	2	0	1	1	1	1	1	1	1	2	0	1	1	1	1	1	1	0	0	0	0	0	1	1	1	1	0	1	1	1
1	0	1	1	1	0	1	1	1	1	1	2	1	1	1	1	1	1	1	1	2	0	1	1	1	1	1	1	1	2	0	1	1	1	1	1	1	0	0	0	0	0	1	1	1	1	0	1	1	1
1	1	1	1	1	0	1	1	1	1	1	2	1	1	1	1	1	1	1	1	2	0	0	1	0	1	1	1	1	2	0	1	1	1	1	1	1	0	0	0	0	0	1	1	1	1	0	1	0	1
1	1	1	1	1	0	1	0	1	1	1	2	1	1	1	1	1	1	1	1	2	0	1	1	1	1	1	1	1	2	0	1	1	1	1	1	1	0	0	0	0	0	1	1	1	1	0	1	1	1
1	1	1	1	1	0	1	0	1	1	1	2	1	1	1	1	1	1	1	1	2	1	1	1	1	1	1	1	1	2	1	1	1	1	1	1	1	0	0	0	0	0	1	1	1	1	0	1	1	1
1	1	1	1	1	0	1	2	1	1	1	2	1	1	1	1	1	1	1	1	2	1	1	1	1	1	1	1	1	2	1	1	0	1	1	1	1	0	0	0	0	0	1	1	1	1	0	1	1	1
1	1	0	1	1	0	1	2	1	1	1	2	0	1	1	1	1	1	1	1	2	1	1	1	1	1	1	1	1	2	1	1	1	1	1	1	1	0	0	0	0	0	1	1	1	1	1	1	1	1
1	1	1	1	1	0	1	2	1	1	1	2	0	1	1	1	1	1	1	1	2	1	1	1	1	1	1	1	1	2	1	1	1	1	1	1	1	0	0	0	0	0	1	1	1	1	1	1	1	1
1	1	1	1	1	0	1	2	1	1	1	2	0	1	1	1	1	1	1	1	2	1	1	1	1	1	1	1	1	2	0	1	1	1	1	1	1	0	0	0	0	0	1	0	1	0	1	1	1	1
0	1	1	1	1	0	1	2	1	1	1	2	0	0	1	1	1	1	1	1	2	1	1	1	1	1	1	1	1	2	1	1	1	1	1	1	1	0	0	0	0	0	1	1	1	1	1	1	1	1
1	1	1	1	1	0	1	2	1	1	1	2	0	0	1	1	1	1	1	1	2	1	1	1	1	1	1	1	1	2	1	1	1	1	1	1	1	0	0	0	0	0	1	1	0	1	1	1	1	1
1	1	1	1	1	0	1	2	1	1	1	0	0	0	1	1	1	1	1	1	2	1	1	1	1	1	1	1	0	2	1	1	1	1	1	1	1	0	0	0	0	0	1	1	1	1	1	1	1	1
1	1	1	1	1	0	1	2	1	1	1	0	0	0	1	1	1	1	1	1	2	1	1	1	1	1	1	1	1	2	1	1	1	1	1	1	1	0	0	0	0	0	1	1	1	1	1	1	0	1
1	1	1	1	1	0	1	2	1	1	1	0	0	1	0	1	1	1	1	1	2	1	1	1	1	0	1	1	1	2	1	1	1	1	1	1	1	0	0	0	0	0	1	1	1	1	1	1	1	1
1	0	1	1	1	0	1	2	1	1	1	0	0	1	0	1	1	1	1	1	2	1	1	1	1	1	1	1	1	2	1	1	1	1	1	1	1	0	0	0	0	0	1	0	1	1	1	1	1	1
1	1	1	1	1	0	1	2	1	1	1	0	0	1	2	1	1	0	1	0	2	1	1	1	1	1	1	1	1	2	1	1	1	1	1	1	1	0	0	0	0	0	1	0	1	0	1	1	1	1
0	1	1	1	1	0	1	2	1	1	1	0	0	1	2	1	1	0	1	0	2	1	1	1	1	1	1	1	1	2	1	1	1	1	1	1	1	0	0	0	0	0	1	0	1	1	1	1	1	1
1	0	1	1	1	0	1	2	1	1	1	0	0	1	2	1	1	0	1	0	2	1	1	1	1	1	1	1	1	2	1	1	1	1	1	1	1	0	0	0	0	0	1	0	1	1	1	1	1	1
1	1	1	1	1	0	1	2	1	1	1	0	0	1	2	1	1	0	1	0	2	1	1	1	1	1	1	1	1	2	1	1	1	1	1	1	1	0	0	0	0	0	1	0	1	1	1	1	1	1
1	1	1	1	0	0	1	2	1	1	1	0	0	1	2	1	1	0	1	0	2	1	0	1	1	1	1	1	1	2	1	1	1	0	1	1	1	0	0	0	0	0	1	0	1	1	1	1	1	1
1	1	1	1	1	0	1	2	1	1	1	0	0	1	2	1	1	0	1	1	2	1	1	1	1	1	1	1	1	2	1	1	1	1	1	1	1	0	0	0	0	0	1	0	1	1	1	1	1	1
1	1	1	1	1	0	0	2	1	1	1	0	0	1	2	1	1	0	1	1	2	1	1	1	1	1	1	1	1	2	1	1	1	1	1	1	1	0	0	0	0	0	1	0	0	1	1	1	1	1
1	1	1	1	1	0	1	2	1	1	1	0	0	1	2	1	1	0	1	1	2	1	1	1	1	1	1	1	1	2	1	1	1	1	1	1	1	0	0	0	0	0	1	0	1	1	1	1	1	1
1	1	1	1	1	0	1	2	0	1	1	0	0	1	2	1	1	0	1	0	2	1	1	1	1	1	1	1	1	2	1	1	1	1	1	1	1	0	0	0	0	0	1	0	1	1	1	1	1	1
1	1	1	1	1	0	1	2	1	1	1	0	0	1	2	1	1	0	1	1	2	1	1	1	1	1	1	1	1	2	1	1	1	0	1	1	1	0	0	0	0	0	1	0	1	1	1	1	1	1
1	1	1	1	1	0	1	2	1	1	1	0	0	1	2	1	1	0	1	1	2	1	1	1	1	1	1	1	1	2	1	1	1	0	1	1	1	0	0	0	0	2	1	0	1	1	1	1	1	1
1	1	1	1	1	0	1	2	1	1	1	0	0	1	2	1	1	0	1	1	2	1	1	1	1	1	1	1	1	2	1	1	1	0	1	1	1	0	0	0	1	2	1	0	1	1	1	1	1	1
1	1	1	1	1	0	1	2	1	1	1	0	0	1	2	1	1	0	1	1	2	1	1	1	1	1	1	1	1	2	1	1	0	0	1	1	1	0	0	0	1	2	1	0	1	1	1	1	1	1
0	1	1	1	1	0	1	2	1	1	1	0	0	1	2	1	1	0	1	1	2	1	1	1	1	1	1	1	1	2	1	1	1	0	1	1	1	0	0	0	1	2	1	0	1	1	1	1	1	1
1	1	1	1	1	0	1	2	1	1	1	0	0	1	2	1	1	0	1	1	2	1	1	1	1	1	1	1	1	2	1	1	1	0	1	1	1	0	0	0	1	2	1	1	1	1	1	1	1	1
1	1	1	1	1	0	1	2	1	1	1	0	0	1	2	1	1	0	1	1	2	1	1	1	1	1	1	1	1	2	1	1	1	0	1	0	1	0	0	0	1	2	1	1	1	1	0	1	0	1
1	1	1	1	1	0	1	2	1	1	0	0	0	1	2	0	1	0	1	1	2	1	1	1	1	1	1	1	1	2	1	1	1	0	1	1	0	0	0	0	1	2	1	0	1	1	1	1	1	1
1	1	1	1	1	1	1	2	1	1	1	0	0	1	2	0	1	0	1	1	2	1	1	1	1	1	1	1	1	2	1	1	1	0	1	1	0	0	0	0	1	2	1	1	1	1	1	1	1	1
0	1	1	1	1	1	1	2	1	1	1	0	0	1	2	0	1	0	1	1	2	1	1	1	1	1	1	1	1	2	1	1	1	0	1	1	0	0	0	0	1	2	1	1	1	1	1	1	1	1
1	0	1	1	0	1	1	2	1	1	1	0	0	1	2	0	1	0	1	1	2	1	1	1	1	1	1	1	1	2	1	1	1	0	1	1	0	0	0	0	1	2	1	1	1	0	1	1	1	0
1	1	1	1	0	1	1	2	1	1	1	0	0	1	2	0	1	0	1	1	2	1	1	1	1	1	1	1	0	2	1	0	0	0	1	1	0	0	0	0	1	2	1	1	1	1	1	1	1	1
1	1	1	1	0	1	1	2	1	1	1	0	0	1	2	0	1	0	1	1	2	1	1	1	1	1	1	0	1	2	1	0	1	0	1	1	0	0	0	0	1	2	1	1	1	1	1	1	1	1
1	1	1	1	0	1	1	2	1	1	1	0	0	1	2	0	1	0	1	1	2	1	1	1	1	1	1	1	1	2	1	0	1	0	1	1	0	0	0	0	1	2	1	0	1	1	1	1	1	1
1	1	1	1	0	1	1	2	1	1	1	0	0	1	2	0	1	0	1	1	2	1	0	1	1	1	1	1	1	2	1	0	1	0	1	1	0	0	0	0	1	2	1	1	1	1	0	1	1	1
1	1	1	1	0	1	1	2	1	0	1	0	0	1	2	0	1	0	1	1	2	1	1	1	0	1	1	1	1	2	1	0	1	0	1	1	0	0	0	0	1	2	1	1	1	0	1	1	1	1
1	0	1	1	1	1	1	2	1	1	1	0	0	1	2	0	1	0	1	1	2	1	1	1	0	0	1	1	1	2	1	0	0	0	1	0	0	0	0	0	1	2	1	1	1	1	1	1	1	1
1	1	1	1	1	1	0	2	1	1	1	0	0	1	2	0	1	0	1	1	2	1	1	1	0	1	1	0	1	2	1	0	0	0	1	1	0	0	0	0	1	2	1	1	1	1	0	1	1	1
1	1	1	1	1	1	1	2	1	1	1	0	2	1	2	0	1	0	1	1	2	1	1	1	0	1	1	1	1	2	1	0	0	0	1	1	0	0	0	0	1	2	1	1	1	1	1	1	1	1
1	1	1	1	1	1	1	2	1	1	1	0	2	1	2	0	1	0	1	1	2	1	1	1	0	1	1	1	1	2	1	0	0	0	1	1	0	0	0	0	1	2	1	1	1	0	1	1	1	1
1	1	1	1	1	1	1	2	1	1	1	0	2	1	2	0	1	0	1	1	2	1	1	1	0	1	1	1	1	2	1	0	0	0	1	1	0	0	0	0	1	2	1	0	1	0	1	1	1	0
1	1	1	0	1	0	1	2	1	1	1	0	2	1	2	0	1	0	1	1	2	1	1	1	0	1	1	1	1	2	1	0	0	0	1	1	0	0	0	0	1	2	1	1	1	0	1	1	1	1
1	1	1	1	1	1	1	2	1	1	1	0	2	1	2	0	1	0	1	1	2	1	1	1	0	1	1	1	1	2	1	0	0	0	1	1	0	0	0	0	1	2	1	1	1	0	1	1	1	1
1	1	1	1	1	1	1	2	1	1	1	0	2	1	2	0	1	0	1	1	2	1	1	1	0	1	1	1	1	2	0	0	0	0	1	1	0	0	0	0	1	2	1	1	1	0	1	1	0	1
1	1	1	1	1	1	1	2	1	1	1	0	2	1	2	0	1	0	1	1	2	0	1	1	0	1	1	1	1	2	1	0	0	0	0	1	0	0	0	0	1	2	1	1	1	0	1	1	1	1
1	1	1	1	1	1	1	2	1	1	1	0	2	1	2	0	1	0	1	1	2	1	1	1	0	1	1	1	1	2	1	0	2	0	0	1	0	0	0	0	1	2	1	1	1	0	1	1	1	1
1	1	1	1	1	1	1	2	1	1	1	0	2	1	2	0	1	0	1	1	2	1	1	1	0	1	1	1	1	2	1	0	2	0	0	1	0	2	0	0	1	2	1	1	1	0	1	1	1	1
0	1	1	1	1	1	1	2	1	1	1	0	2	1	2	0	1	0	1	1	2	1	1	1	0	1	1	1	1	2	1	0	2	0	0	1	0	2	0	0	1	2	1	1	1	0	1	1	1	1
0	1	1	1	1	1	1	2	1	1	1	0	2	1	2	0	1	0	1	1	2	1	1	1	0	1	1	1	1	2	1	0	2	0	0	1	0	2	0	0	1	2	1	1	1	0	1	1	1	1
0	1	1	1	1	1	1	2	1	1	1	0	2	1	2	0	1	0	1	1	2	1	1	1	0	1	1	1	1	2	1	0	2	0	0	1	0	2	0	0	1	2	1	1	1	0	1	0	1	1
0	1	1	1	1	1	1	2	1	1	1	0	2	1	2	0	1	0	1	1	2	1	1	1	0	1	1	1	1	2	1	0	2	0	0	1	0	2	0	0	1	2	1	1	1	0	1	0	1	1
0	1	1	1	1	1	1	0	1	1	1	0	2	1	2	0	1	0	1	1	2	1	1	1	0	1	1	1	1	2	1	0	2	0	0	1	0	2	0	0	1	2	1	1	1	0	1	2	1	1
0	1	1	1	1	1	1	0	1	1	1	0	2	1	2	0	1	0	1	1	2	1	1	1	0	1	1	1	1	2	1	0	2	0	0	0	0	2	0	0	1	2	1	0	1	0	1	2	1	1
0	1	1	1	1	1	1	0	1	1	1	0	2	1	2	0	1	0	1	1	2	1	1	1	0	1	1	1	1	2	1	1	2	0	0	1	0	2	0	0	1	2	1	1	1	0	0	2	1	1
0	1	1	1	1	1	1	0	1	1	1	0	2	1	2	0	1	0	1	1	2	1	1	1	0	1	1	1	1	2	1	1	2	0	0	1	0	2	0	0	1	2	1	1	1	0	1	2	1	1
0	1	1	1	1	1	1	0	1	1	1	0	2	1	2	0	1	0	1	1	2	1	1	1	0	1	1	1	0	2	1	1	2	0	0	1	0	2	0	0	1	2	1	1	1	0	1	2	1	1
0	1	1	1	1	1	1	0	0	1	1	0	2	1	2	0	1	0	1	1	2	0	1	1	0	1	1	1	0	2	1	1	2	0	0	1	0	2	0	0	1	2	1	1	1	0	1	2	1	1
0	1	1	1	0	1	1	0	1	1	1	0	2	1	2	0	1	0	1	1	2	1	1	1	0	1	1	1	0	2	1	1	2	0	0	1	0	2	0	0	0	2	1	1	1	0	0	2	1	1
0	1	1	1	1	1	1	0	1	1	1	0	2	1	2	0	1	0	1	1	2	1	1	1	0	1	1	1	0	2	1	1	2	0	0	1	0	2	2	0	1	2	1	1	1	0	0	2	1	1
0	1	1	1	1	1	1	0	1	1	1	0	2	1	2	0	1	0	1	1	2	1	1	1	0	1	1	0	0	2	1	1	2	0	0	1	0	2	2	0	1	2	1	1	1	0	0	2	1	0
0	1	1	1	1	1	1	0	1	1	1	0	2	1	2	0	1	0	1	1	2	1	1	1	0	1	1	0	0	2	1	1	2	2	2	1	0	2	2	0	1	2	1	1	1	0	0	2	1	0
0	1	1	1	1	1	1	0	1	1	1	0	2	1	2	0	1	0	1	1	2	1	1	1	0	1	0	0	0	2	1	1	2	2	2	1	0	2	2	0	1	2	1	1	1	0	0	2	1	0
0	1	1	1	1	1	1	0	1	1	1	0	2	1	2	0	1	0	1	1	2	1	0	1	0	1	0	0	0	2	1	1	2	2	2	1	0	2	2	0	1	2	1	1	0	0	0	2	1	0
0	1	1	1	1	1	1	0	1	1	1	0	2	1	2	0	1	0	1	1	2	1	0	1	0	1	0	0	0	2	1	1	2	2	2	1	0	2	2	0	0	2	1	1	1	0	0	2	1	0
0	1	1	1	1	1	1	0	1	1	1	0	2	1	2	0	1	0	1	1	2	1	0	1	0	1	0	0	0	2	1	1	2	2	2	1	1	2	2	0	1	2	1	1	1	0	0	2	0	0
0	1	1	1	1	1	1	0	1	1	1	0	2	1	2	2	1	0	1	1	2	1	0	1	0	0	0	0	0	2	1	1	2	2	2	1	1	2	2	0	1	2	1	1	1	0	0	2	1	0
0	1	0	1	1	1	1	0	1	0	1	0	2	1	2	2	1	0	1	1	2	0	0	1	0	0	0	0	0	0	1	1	2	2	2	1	1	2	2	0	1	2	1	1	1	0	0	2	1	0
0	1	1	0	1	1	0	0	1	0	1	0	2	1	2	2	1	0	1	1	2	1	0	1	0	0	0	0	0	0	1	1	2	2	2	1	1	2	2	0	1	2	1	1	1	0	0	2	1	0
0	1	1	1	1	1	1	0	1	0	1	0	2	0	2	2	1	0	1	1	2	1	0	1	0	0	0	0	0	0	1	1	2	2	2	1	1	2	2	0	1	2	1	1	1	0	0	2	1	0
0	1	1	1	1	1	1	0	1	0	1	0	2	0	2	2	1	0	1	1	2	1	0	1	0	0	0	0	0	0	1	1	2	2	2	1	1	2	2	0	1	2	1	1	1	0	0	2	1	0
0	1	1	1	1	1	1	0	1	0	1	0	2	0	2	2	0	0	1	1	2	1	0	1	0	0	0	0	0	0	1	1	2	2	2	1	1	2	2	0	1	2	1	1	1	0	0	2	1	0
0	1	1	1	1	1	1	0	1	0	1	0	2	0	2	2	0	0	1	1	2	1	0	1	0	0	0	0	0	0	1	1	2	2	2	1	1	2	2	0	1	2	1	1	1	0	0	2	1	0
0	1	1	1	1	1	1	0	1	0	1	0	2	0	2	2	2	0	1	1	2	1	0	1	0	0	0	2	0	0	1	1	2	2	2	1	1	2	2	0	1	2	1	1	1	0	0	2	1	0
0	1	1	1	1	1	1	0	1	0	1	0	2	0	2	2	2	0	1	1	2	1	0	1	0	0	0	2	0	0	1	1	2	2	2	1	1	2	2	0	0	2	1	1	1	0	0	2	1	0
0	1	1	1	1	1	1	0	1	0	1	0	2	0	2	2	2	0	1	1	2	1	0	1	0	0	0	2	0	0	1	1	2	2	2	1	1	2	2	0	1	2	1	1	1	0	0	2	1	0
0	1	1	1	1	1	1	0	1	0	1	0	2	0	2	2	2	0	1	1	2	1	0	1	0	0	0	2	0	0	1	1	2	2	2	1	1	2	2	0	1	2	1	1	1	0	0	2	1	0
0	1	1	1	1	1	1	0	1	0	1	0	2	0	2	2	2	0	1	1	2	1	0	1	0	0	0	2	0	0	1	1	2	2	2	1	1	2	2	0	0	2	1	1	1	0	0	2	1	0
0	1	1	1	1	1	1	0	1	0	1	0	2	0	2	2	2	0	1	1	2	1	0	1	0	0	0	2	0	0	0	1	2	2	2	1	1	2	2	0	1	2	1	1	1	0	0	2	1	0
0	1	1	1	1	1	1	0	1	0	1	0	2	0	2	2	2	0	1	1	2	1	0	1	0	0	0	2	0	0	0	1	2	2	2	1	1	2	2	0	1	2	1	1	1	0	0	2	1	0
0	1	1	1	1	1	1	0	1	0	1	2	2	0	2	2	2	0	1	1	2	1	0	1	0	0	0	2	0	0	0	1	2	2	2	1	1	2	2	0	1	2	1	1	1	0	0	2	1	0
0	1	1	0	1	1	1	0	1	0	1	2	2	0	2	2	2	0	0	1	2	1	0	1	0	0	0	2	0	0	0	1	2	2	2	1	1	2	2	0	1	2	1	1	0	0	0	2	1	0
0	1	1	1	1	1	1	0	1	0	1	2	2	0	2	2	2	0	1	1	2	1	0	1	0	0	0	2	0	0	0	1	2	2	2	1	1	2	2	0	1	2	0	1	1	0	0	2	1	0
0	1	1	1	1	1	1	0	1	0	1	2	2	0	2	2	2	0	1	1	2	1	0	1	0	0	0	2	0	0	0	1	2	2	2	1	1	2	2	0	1	2	0	1	1	0	0	2	0	0
0	1	1	1	1	1	1	0	1	0	1	2	2	0	2	2	2	0	1	1	2	1	0	1	0	0	0	2	0	0	0	1	2	2	2	1	1	2	2	0	0	2	0	1	1	0	0	2	1	2
0	1	1	1	1	1	1	0	1	0	1	2	2	0	2	2	2	0	1	1	2	1	0	1	0	0	0	2	0	0	0	1	2	2	2	1	1	2	2	0	0	2	0	1	1	0	0	2	1	2
0	1	1	1	1	1	1	0	1	0	1	2	2	2	2	2	2	0	1	1	2	1	0	1	0	0	0	2	0	0	0	1	2	2	2	1	0	2	2	0	0	2	0	1	1	0	0	2	1	2
0	1	1	0	1	1	1	0	1	0	1	2	2	2	2	2	2	0	1	1	2	1	0	1	0	0	0	2	0	0	0	1	2	2	2	1	1	2	2	2	0	2	0	1	1	0	0	2	1	2
0	1	1	1	1	1	1	0	1	0	1	2	2	2	2	2	2	0	1	1	2	1	0	1	0	0	0	2	0	0	0	1	2	2	2	1	1	2	2	2	0	2	0	1	1	0	0	2	1	2
0	1	1	1	1	1	1	0	1	0	1	2	2	2	2	2	2	0	1	1	2	1	0	1	0	0	0	2	0	0	0	0	2	2	2	1	1	2	2	2	0	2	0	1	1	0	0	2	1	2
0	1	1	1	1	1	1	0	1	0	1	2	2	2	2	2	2	0	1	1	2	1	0	1	0	0	0	2	0	0	0	1	2	2	2	1	1	2	2	2	0	2	0	1	0	0	0	2	1	2
0	0	1	1	1	1	1	0	1	0	0	2	2	2	2	2	2	0	1	1	2	1	0	1	0	0	0	2	0	0	0	1	2	2	2	1	1	2	2	2	0	2	0	1	0	0	0	2	1	2
0	1	1	1	1	1	1	0	1	0	0	2	2	2	2	2	2	0	1	1	2	1	0	1	0	0	0	2	0	0	0	1	2	2	2	1	1	2	2	2	0	2	0	1	0	0	0	2	1	2
0	1	1	1	1	1	1	0	1	0	0	2	2	2	2	2	2	0	1	1	2	1	0	1	0	0	0	2	0	0	0	1	2	2	2	1	1	2	2	2	0	2	0	1	0	1	0	2	1	2
0	1	1	1	1	1	1	0	1	0	0	2	2	2	2	2	2	0	1	1	2	1	0	1	0	0	0	2	0	0	0	1	2	2	2	1	1	2	2	2	0	2	0	1	0	1	0	2	1	2
0	1	1	1	1	1	1	0	1	0	0	2	2	2	2	2	2	0	1	0	2	1	0	1	0	0	0	2	0	0	0	1	2	2	2	1	1	2	2	2	0	2	0	1	0	1	0	2	1	2
0	1	1	1	1	1	1	0	1	0	0	2	2	2	2	0	2	0	1	0	2	1	0	1	0	0	0	2	0	0	2	1	2	2	2	1	1	2	2	2	0	2	0	1	0	1	0	2	1	2
0	1	1	1	1	1	1	0	1	0	0	2	2	2	2	0	2	0	1		2	1	0	1	0	0	0	2	0	0	2	1	2	2	2	0	1	2	2	2	0	2	0	1	0	1	0	2	1	2
0	1	1	1	1	1	1	0	1	0	0	2	2	2	2	0	2	0	1		2	1	0	1	0	0	0	2	0	0	2	0	2	2	2	0	1	2	2	2	0	0	0	1	0	1	0	2	1	2
0	1	1	1	1	1	1	0	1	0	0	2	2	2	2	0	2	0	1		2	1	0	0	0	0	0	2	0	0	2	1	2	2	2	0	1	2	2	2	0	0	0	1	0	1	0	2	1	2
0	1	1	1	1	1	1	0	1	0	0	2	2	2	2	0	2	0	1		2	1	0	0	0	0	0	2	0	2	2	1	2	2	2	0	1	2	2	2	0	0	0	1	0	1	0	2	1	2
0	1	1	1	1	1	1	0	1	0	0	2	2	2	2	0	2	0	1		2	1	0	0	0	0	0	2	0	2	2	1	2	2	2	0	1	2	2	2	0	0	0	1	0	1	0	2	1	2
0	1	1	1	1	1	1	0	1	0	0	2	2	2	2	0	2	0	1		2	1	0	0	0	0	0	2	0	2	2	1	2	2	2	0	1	2	2	2	0	0	0	1	0	1	0	2	1	2
0	1	1	1	1	1	1	2	1	0	0	2	2	2	2	0	2	0	1		2	1	0	0	0	0	0	2	0	2	2	1	2	2	2	0	1	2	2	2	0	0	0	1	0	1	0	2	1	2
0	1	0	1	1	1	1	2	1	0	0	2	2	2	2	0	2	0	1		2	1	0	0	0	0	0	2	0	2	2	1	2	2	2	0	1	2	2	2	0	0	0	1	0	1	0	2	1	2
0	1	0	1	1	1	1	2	1	0	0	2	2	2	2	0	2	0	1		2	1	0	0	0	0	0	2	0	2	2	0	2	2	2	0	1	2	2	2	0	0	0	1	0	1	0	2	1	2
0	1	0	1	1	1	1	2	1	0	0	2	2	2	2	0	2	0	1		2	1	0	0	0	0	0	2	0	2	2	0	2	2	2	0	1	2	2	2	0	0	0	1	0	1	0	2	1	2
0	1	0	1	1	1	1	2	1	0	0	2	2	2	2	0	2	0	1		2	1	0	0	0	0	0	2	0	2	2	0	2	2	2	0	1	2	2	2	0	0	0	1	0	1	0	2	0	2
0	1	2	1	1	1	1	2	1	0	0	2	2	2	2	0	2	0	1		2	1	0	0	0	0	0	2	0	2	2	0	2	2	2	0	1	2	2	2	0	0	0	1	0	1	0	2	0	2
0	1	2	1	1	1	1	2	1	0	0	2	2	2	2	0	2	0	1		2	0	0	0	0	0	0	2	0	2	2	0	2	2	2	0	1	2	2	2	0	0	0	1	0	1	0	2	0	2
0	1	2	1	1	1	1	2	1	0	0	2	2	2	2	0	2	0	0		2	1	0	0	0	0	0	2	2	2	2	0	2	2	2	0	1	2	2	2	0	0	0	1	0	1	0	2	0	2
0	1	2	0	1	1	1	2	1	0	0	2	2	2	2	0	2	0	0		2	1	0	0	0	0	0	2	2	2	2	0	2	2	2	0	1	2	2	2	0	0	0	1	0	1	0	2	0	2
0	1	2	1	1	1	1	2	0	0	2	2	2	2	2	0	2	0	0		2	1	0	0	0	0	0	2	2	2	2	0	2	2	2	0	0	2	2	2	0	0	0	1	0	1	0	2	0	2
0	1	2	1	1	1	1	2	0	0	2	2	2	2	2	0	2	0	0		2	1	0	0	0	0	0	2	2	2	2	0	2	2	2	0	0	2	2	2	0	0	0	1	0	1	0	2	0	2
0	1	2	1	1	1	1	2	0	0	2	2	2	2	2	0	2	0	0		2	0	0	0	0	0	0	2	2	2	2	0	2	2	2	0	0	2	2	2	0	0	0	0	0	1	0	2	0	2
0	1	2	1	1	1	1	2	0	0	2	2	2	2	2	0	2	0	0		2	1	0	0	0	0	0	2	2	2	2	0	2	2	2	0	0	2	2	2	0	0	0	0	0	1	0	2	0	2
0	1	2	1	1	1	1	2	0	0	2	2	2	2	2	0	2	0	0		2	1	0	0	0	0	0	2	2	2	2	0	2	2	2	0	0	2	2	2	0	0	0	0	0	1	0	2	0	2
0	1	2	0	1	1	1	2	0	0	2	2	2	2	2	0	2	0	0		2	1	0	0	0	0	0	2	2	2	2	0	2	2	2	0	0	2	2	2	0	0	0	0	0	1	0	2	0	2
0	1	2	0	1	1	1	2	0	0	2	2	2	2	2	0	2	0	0		2	1	0	0	0	0	0	2	2	2	2	0	2	2	2	0	0	2	2	2	0	0	0	0	0	1	0	2	0	2
0	1	2	0	1	1	1	2	0	0	2	2	2	2	2	0	2	0	0		2	1	0	0	0	0	0	2	2	2	2	0	2	2	2	2	0	2	2	2	0	0	0	0	0	1	0	2	2	2
0	1	2	0	1	1	1	2	0	0	2	2	2	2	2	0	2	0	0		2	1	0	0	0	0	0	2	2	2	2	0	2	2	2	2	0	2	2	2	0	0	2	0	0	1	0	2	2	2
0	1	2	0	1	1	1	2	0	0	2	2	2	2	2	0	2	0	0		2	1	0	0	0	0	0	2	2	2	2	0	2	2	2	2	0	2	2	2	0	0	2	0	0	1	0	2	2	2
0	1	2	0	1	1	1	2	0	0	2	2	2	2	2	0	2	0	0		2	0	0	0	0	0	0	2	2	2	2	0	2	2	2	2	0	2	2	2	0	0	2	0	0	1	0	2	2	2
0	1	2	0	1	1	1	2	0	0	2	2	2	2	2	0	2	0	0		2	0	0	0	0	0	0	2	2	2	2	0	2	2	2	2	0	2	2	2	0	0	2	0	0	1	0	2	2	2
2	1	2	0	1	1	1	2	0	0	2	2	2	2	2	0	2	0	0		2	0	0	0	0	0	0	2	2	2	2	0	2	2	2	2	0	2	2	2	0	0	2	0	0	1	0	2	2	2
2	1	2	0	1	1	1	2	0	0	2	2	2	2	2	0	2	0	0		2	0	0	0	0	0	0	2	2	2	2	0	2	2	2	2	0	2	2	2	0	0	2	0	0	1	0	2	2	2
2	1	2	0	1	1	1	2	0	0	2	2	2	2	2	0	2	2	0		2	0	0	0	0	0	0	2	2	2	2	0	2	2	2	2	0	2	2	2	0	0	2	0	0	1	0	2	2	2
2	1	2	0	1	1	0	2	0	0	2	2	2	2	2	0	2	2	0		2	0	0	0	0	0	0	2	2	2	2	0	2	2	2	2	0	2	2	2	0	0	2	0	0	1	0	2	2	2
2	1	2	0	1	1	0	2	0	0	2	2	2	2	2	0	2	2	0		2	0	0	0	0	2	0	2	2	2	2	0	2	2	2	2	0	2	2	2	0	0	2	0	0	1	0	2	2	2
2	1	2	0	1	1	0	2	0	0	2	2	2	2	2	0	2	2	0		2	0	0	0	0	2	0	2	2	2	2	0	2	2	2	2	0	2	2	2	0	0	2	0	0	1	0	2	2	2
2	1	2	0	1	1	0	2	0	0	2	2	2	2	2	0	2	2	0		2	0	0	0	0	2	0	2	2	2	2	0	2	2	2	2	0	2	2	2	0	0	2	0	0	1	0	2	2	2
2	1	2	0	0	1	0	2	0	0	2	2	2	2	2	0	2	2	0		2	0	0	0	0	2	0	2	2	2	2	0	2	2	2	2	0	2	2	2	0	0	2	2	0	1	0	2	2	2
2	1	2	0	0	1	0	2	0	0	2	2	2	2	2	0	2	2	0		2	0	0	0	0	2	0	2	2	2	2	0	2	2	2	2	0	2	2	2	0	0	2	2	0	1	0	2	2	2
2	1	2	0	0	1	0	2	0	0	2	2	2	2	2	0	2	2	0		2	0	0	0	0	2	0	2	2	2	2	0	2	2	2	2	0	2	2	2	0	0	2	2	0	1	0	2	2	2
2	1	2	0	0	1	0	2	0	0	2	2	2	2	2	0	2	2	0		2	0	0	0	2	2	0	2	2	2	2	0	2	2	2	2	0	2	2	2	0	0	2	2	0	1	0	2	2	2
2	1	2	0	0	1	0	2	0	0	2	2	2	2	2	0	2	2	0		2	0	0	0	2	2	0	2	2	2	2	0	2	2	2	2	0	2	2	2	0	0	2	2	0	1	0	2	2	2
2	1	2	0	0	1	0	2	0	0	2	2	2	2	2	0	2	2	0		2	0	0	0	2	2	0	2	2	2	2	0	2	2	2	2	0	2	2	2	0	0	2	2	0	1	0	2	2	2
2	1	2	0	2	1	0	2	0	0	2	2	2	2	2	0	2	2	0		2	0	0	0	2	2	0	2	2	2	2	0	2	2	2	2	0	2	2	2	0	0	2	2	0	1	0	2	2	2
2	1	2	0	2	1	0	2	0	0	2	2	2	2	2	0	2	2	0		2	0	0	0	2	2	0	2	2	2	2	0	2	2	2	2	0	2	2	2	0	0	2	2	0	1	0	2	2	2
2	1	2	0	2	1	0	2	0	0	2	2	2	2	2	0	2	2	0		2	0	2	0	2	2	0	2	2	2	2	0	2	2	2	2	0	2	2	2	0	0	2	2	0	1	0	2	2	2
2	1	2	0	2	1	0	2	0	0	2	2	2	2	2	0	2	2	0		2	0	2	0	2	2	0	2	2	2	2	0	2	2	2	2	0	2	2	2	0	0	2	2	0	1	0	2	2	2
2	1	2	0	2	1	0	2	0	0	2	2	2	2	2	0	2	2	0		2	0	2	0	2	2	0	2	2	2	2	0	2	2	2	2	0	2	2	2	0	0	2	2	0	1	0	2	2	2
2	1	2	0	2	1	0	2	0	0	2	2	2	2	2	0	0	2	0		2	0	2	0	2	2	0	2	2	2	2	0	2	2	2	2	0	2	2	2	0	0	2	2	0	1	0	2	2	2
2	1	2	0	2	1	0	2	0	0	2	2	2	2	2	0	0	2	0		2	0	2	0	2	2	0	2	2	2	2	0	2	2	2	2	0	2	2	2	0	0	2	2	0	1	0	2	2	2
2	1	2	0	2	1	2	2	0	0	2	2	2	2	2	0	0	2	0		2	0	2	0	2	2	0	2	2	2	2	0	2	2	2	2	0	2	2	2	0	0	2	2	0	1	0	2	2	2
2	1	2	0	2	0	2	2	0	0	2	2	2	2	2	0	0	2	0		2	0	2	0	2	2	0	2	2	2	2	0	2	2	2	2	0	2	2	2	0	0	2	2	0	1	0	2	2	2
2	1	2	0	2	1	2	2	0	0	2	2	2	2	2	0	0	2	0		2	0	2	0	2	2	0	2	2	2	2	0	2	2	2	2	0	2	2	2	0	0	2	2	0	1	0	2	2	2
2	1	2	0	2	1	2	2	0	0	2	2	2	2	2	0	0	2	0		2	0	2	0	2	2	0	2	2	2	2	0	2	2	2	2	0	2	2	2	0	0	2	2	0	1	0	2	2	2
2	1	2	0	2	1	2	2	0	0	2	2	2	2	2	0	0	2	0		2	0	2	0	2	2	0	2	2	2	2	0	2	2	2	2	0	2	2	2	0	0	2	2	0	1	0	0	2	2
2	1	2	0	2	1	2	2	0	0	2	2	2	2	2	0	0	2	0		2	0	2	0	2	2	0	2	2	2	2	0	2	2	2	2	0	2	2	2	0	0	2	2	0	1	0	0	2	2
2	1	2	0	2	1	2	2	0	2	2	2	2	2	2	0	0	2	2		2	0	2	0	2	2	0	2	2	2	2	0	2	2	2	2	0	2	2	2	0	0	2	2	0	1	0	0	2	2
2	1	2	0	2	1	2	2	0	2	2	2	2	2	2	0	0	2	2		2	0	2	0	2	2	0	2	2	2	2	0	2	2	2	2	0	2	2	2	0	0	2	2	0	1	0	0	2	2
2	1	2	0	2	1	2	2	0	2	2	2	2	0	2	0	0	2	2		2	0	2	0	2	2	0	2	2	2	2	0	2	2	2	2	0	2	2	2	0	0	2	2	0	1	0	0	2	2
0	1	2	0	2	1	2	2	0	2	2	2	2	0	2	0	0	2	2		2	0	2	0	2	2	0	2	2	2	2	0	2	2	2	2	0	2	2	2	0	0	2	2	0	1	0	0	2	2
0	1	2	0	2	1	2	2	2	2	2	2	2	0	2	0	0	2	2		2	0	2	0	2	2	0	2	2	2	2	0	2	2	2	2	0	2	2	2	0	0	2	2	0	1	0	0	2	2
0	1	2	0	2	1	2	2	2	2	2	0	2	0	2	0	0	2	2		2	0	2	0	2	2	0	2	2	2	2	0	2	2	2	2	0	2	2	2	0	0	2	2	0	1	0	0	2	2
0	1	2	0	2	1	2	2	2	2	2	0	2	0	2	0	0	2	2		2	0	2	0	2	2	0	2	2	2	2	0	2	2	2	2	0	2	2	2	0	0	2	2	0	1	0	0	2	2
0	1	2	0	2	1	2	2	2	2	2	0	2	0	2	0	0	2	2		2	0	2	0	2	2	0	2	2	2	2	0	2	2	2	2	0	2	2	2	0	0	2	2	0	1	0	0	2	2
0	1	2	0	2	1	2	2	2	2	2	0	2	0	2	0	0	2	2		2	0	2	0	2	2	0	2	2	2	2	0	2	2	2	2	0	2	2	2	0	0	2	2	0	1	0	0	2	2
0	1	2	0	2	1	2	2	2	2	2	0	2	0	2	0	0	2	2		2	0	2	2	2	2	0	2	2	2	2	0	2	2	2	2	0	2	2	2	0	0	2	2	0	1	0	0	2	2
0	1	2	0	2	1	2	2	2	2	2	0	2	0	2	0	0	2	2		2	0	2	2	2	2	0	2	2	2	2	0	2	2	2	2	0	2	2	2	0	0	2	2	0	1	0	0	2	2
0	1	2	0	2	1	2	2	2	2	2	0	2	0	2	0	0	2	2		2	0	2	2	2	2	0	2	2	2	2	0	2	2	2	2	0	2	2	2	0	0	2	2	0	1	0	0	2	2
0	1	2	0	2	1	2	2	2	2	2	0	2	0	2	0	0	2	2		2	0	2	2	2	2	0	2	2	2	2	0	2	2	2	2	0	2	2	2	0	0	2	2	0	1	0	0	2	2
0	1	2	0	2	1	2	2	2	2	2	0	2	0	2	0	0	2	2		2	0	2	2	2	2	0	2	2	2	2	0	2	2	2	2	0	2	2	0	0	0	2	2	0	1	2	0	2	2
0	1	2	0	2	1	2	2	2	2	2	0	2	0	2	0	0	2	2		2	0	2	2	2	2	0	2	2	2	2	0	2	2	2	2	0	2	2	0	0	0	2	2	0	1	2	0	2	2
0	1	2	0	2	1	2	2	2	2	2	0	2	0	2	0	0	2	2		2	0	2	2	2	2	0	2	2	2	2	0	2	2	2	2	0	2	2	0	0	0	2	2	0	1	2	0	2	2
0	1	2	0	2	1	2	2	2	2	2	0	2	0	2	0	0	2	2		2	0	2	2	2	2	0	2	2	2	2	0	2	2	2	2	0	2	2	0	0	0	2	2	0	1	2	0	2	2
0	1	2	0	2	1	2	2	2	2	2	0	2	0	2	0	0	2	2		2	0	2	2	2	2	0	2	2	2	2	0	2	2	2	2	0	2	2	0	0	0	2	2	0	1	2	0	2	2
0	1	2	0	2	1	2	2	2	2	2	0	2	0	2	0	0	2	2		2	0	2	2	2	2	0	2	2	2	2	0	2	2	2	2	0	2	2	0	0	0	2	2	0	1	2	0	2	2
0	1	2	0	2	1	2	2	2	2	2	0	2	0	2	0	0	2	2		2	0	2	2	2	2	0	2	2	2	2	0	2	2	2	2	0	2	2	0	0	0	2	2	0	1	2	0	2	2
0	1	2	0	2	1	2	2	2	2	2	0	2	0	2	0	0	2	2		2	0	2	2	2	2	0	2	2	2	2	0	2	2	2	2	0	2	2	0	0	0	2	2	0	1	2	0	2	2
0	1	2	0	2	1	2	0	2	2	2	0	2	0	2	0	0	2	2		2	0	2	2	2	2	0	2	2	2	2	0	2	2	2	2	0	2	2	0	0	0	2	2	0	1	2	0	2	2
0	1	2	0	2	1	2	0	2	2	2	0	2	0	2	0	0	2	2		2	0	2	2	0	2	0	2	2	2	2	0	2	2	2	2	0	2	2	0	0	0	2	2	0	1	2	0	2	2
0	1	2	0	2	1	2	0	2	2	2	0	2	0	2	0	0	2	2		2	0	2	2	0	2	0	2	2	2	2	0	2	2	2	2	0	2	2	0	0	0	2	2	0	1	2	0	2	2
0	1	2	0	2	1	2	0	2	2	2	0	2	0	2	0	0	2	2		2	0	2	2	0	2	0	2	2	2	2	0	2	2	2	2	0	2	2	0	0	0	2	2	0	1	2	0	2	2
0	1	2	0	2	1	2	0	2	2	2	0	2	0	2	0	0	2	2		2	0	2	2	0	2	0	2	2	2	2	0	2	2	2	2	0	2	2	0	0	0	2	2	0	1	2	0	2	2
0	1	2	0	2	1	2	0	2	2	2	0	2	0	2	0	0	2	2		2	0	2	2	0	2	0	2	2	2	2	0	2	2	2	2	0	2	2	0	0	0	2	2	0	1	2	0	2	2
0	1	2	0	2	1	2	0	2	2	2	0	2	0	2	0	0	2	2		2	0	2	2	0	2	0	2	2	2	2	0	2	2	2	2	0	2	2	0	0	0	2	2	0	1	2	0	2	2
0	1	2	0	2	1	2	0	2	2	2	0	2	0	2	0	0	2	2		2	0	2	2	0	2	0	0	2	2	2	0	2	2	2	2	0	2	2	0	0	0	2	2	0	1	2	0	2	2
0	1	2	0	2	0	2	0	2	2	2	0	2	0	2	0	0	2	2		2	0	2	2	0	2	0	0	2	2	2	0	2	2	2	2	0	2	2	0	0	0	2	2	0	1	2	0	2	2
0	1	0	0	2	1	2	0	2	2	2	0	2	0	2	0	0	2	2		2	0	2	2	0	2	0	0	2	2	2	0	2	2	2	2	0	2	2	0	0	0	2	2	0	1	2	0	2	2
0	1	0	0	2	1	2	0	2	2	2	0	2	0	2	0	0	2	2		2	0	2	2	0	2	0	0	2	2	2	0	2	2	2	2	0	2	2	0	0	0	2	2	0	1	2	0	2	2
0	1	0	0	2	1	2	0	2	2	2	0	2	0	2	0	0	2	2		2	0	2	0	0	2	0	0	2	2	2	0	2	2	2	2	0	2	2	0	0	0	2	2	0	1	2	0	2	2
0	1	0	0	2	1	2	0	2	2	2	0	2	0	2	0	0	2	2		2	0	2	0	0	2	0	0	2	2	2	0	2	2	2	2	0	2	2	0	0	0	2	2	0	1	2	0	2	2
0	1	0	0	2	1	2	0	2	2	2	0	2	0	2	0	0	2	2		2	0	2	0	0	2	0	0	2	2	2	0	2	2	2	2	0	2	2	0	0	0	2	2	0	1	2	0	2	2
0	1	0	0	2	1	2	0	2	2	2	0	2	0	2	0	0	2	2		2	0	2	0	0	2	0	0	2	2	2	0	2	2	2	2	0	2	2	0	0	0	2	2	0	1	2	0	2	2
0	1	0	0	2	1	2	0	2	2	2	0	2	0	2	0	0	2	2		2	0	0	0	0	2	0	0	2	2	2	0	2	2	2	2	0	2	2	0	0	0	0	2	0	1	2	0	2	2
0	1	0	0	2	1	2	0	2	2	2	0	2	0	2	0	0	2	2		2	0	0	0	0	2	0	0	2	2	2	0	2	2	2	2	0	2	2	0	0	0	0	2	0	1	2	0	2	0
0	1	0	0	2	1	2	0	2	2	2	0	2	0	2	0	0	2	2		2	0	0	0	0	2	0	0	2	2	2	0	2	2	2	2	0	2	2	0	0	0	0	2	0	1	2	0	2	0
0	1	0	0	2	1	2	0	2	2	2	0	2	0	2	0	0	2	2		2	0	0	0	0	2	0	0	2	2	2	0	2	2	2	2	0	2	2	0	0	0	0	2	0	1	2	0	2	0
0	1	0	0	2	1	2	0	2	2	2	0	2	0	2	0	0	2	2		2	0	0	0	0	2	0	0	2	2	2	0	2	2	2	2	0	2	2	0	0	0	0	0	0	1	2	0	2	0
0	1	0	0	2	1	2	0	2	2	2	0	2	0	2	0	0	2	2		0	0	0	0	0	2	0	0	2	2	2	0	2	2	2	2	0	2	0	0	0	0	0	0	0	1	2	0	2	0
0	1	0	0	2	1	2	0	2	2	2	0	2	0	2	0	0	2	2		0	0	0	0	0	2	0	0	2	2	2	0	2	2	2	2	0	2	0	0	0	0	0	0	0	1	2	0	2	0
0	1	0	0	2	1	2	0	2	2	2	0	2	0	2	0	0	2	2		0	0	0	0	0	2	0	0	2	2	2	0	2	2	2	0	0	2	0	0	0	0	0	0	0	1	2	0	2	0
0	1	0	0	2	1	2	0	2	2	2	0	2	0	2	0	0	2	2		0	0	0	0	0	2	0	0	2	2	2	0	2	2	2	0	0	2	0	0	0	0	0	0	0	1	2	0	2	0
0	1	0	0	2	1	2	0	2	2	2	0	2	0	2	0	0	2	2		0	0	0	0	0	2	0	0	2	2	2	0	2	2	2	0	0	2	0	0	0	0	0	0	0	1	2	0	2	0
0	1	0	0	2	1	2	0	2	2	2	0	2	0	2	0	0	2	2		0	0	0	0	0	2	0	0	2	2	2	0	2	2	2	0	0	2	0	0	0	0	0	0	0	1	2	0	2	0
0	1	0	0	2	1	2	0	2	2	2	0	2	0	2	0	0	2	2		0	0	0	0	0	2	0	0	2	2	2	0	2	2	2	0	0	2	0	0	0	0	0	0	0	1	2	0	2	0
0	1	0	0	2	1	2	0	2	2	2	0	2	0	2	0	0	2	2		0	0	0	0	0	2	0	0	2	2	2	0	2	2	2	0	0	2	0	0	0	0	0	0	0	1	2	0	2	0
0	1	0	0	2	1	2	0	2	2	2	0	2	0	2	0	0	2	2		0	0	0	0	0	2	0	0	2	2	2	0	2	2	2	0	0	2	0	0	0	0	0	0	0	1	2	0	2	0
0	1	0	0	2	1	2	0	2	2	2	0	2	0	2	0	0	2	2		0	0	0	0	0	2	0	0	2	2	2	0	2	2	2	0	0	2	0	0	0	0	0	0	0	1	2	0	2	0
0	1	0	0	2	1	2	0	2	2	2	0	2	0	2	0	0	2	2		0	0	0	2	0	2	0	0	2	2	2	0	2	2	2	0	0	2	0	0	0	0	0	0	0	0	2	0	2	0
0	1	0	0	2	0	2	0	2	2	2	0	2	0	2	0	0	2	2		0	0	0	2	0	2	0	0	2	2	2	0	2	2	2	0	0	2	0	0	0	0	0	0	0	0	2	0	2	0
0	1	0	0	2	1	2	0	2	2	2	0	2	0	2	0	0	2	2		0	0	0	2	0	2	0	0	2	2	2	0	2	2	2	0	0	2	0	0	0	0	0	0	0	0	2	0	2	0
0	1	0	0	2	1	2	0	2	2	2	0	2	0	2	0	0	2	2		0	0	0	2	0	2	0	0	2	2	2	0	2	2	2	0	0	2	0	0	0	0	0	0	0	0	2	0	2	0
0	1	0	0	2	1	2	0	2	2	2	0	2	0	2	0	0	2	2		0	0	0	2	0	2	0	0	2	2	2	0	2	2	2	0	0	2	0	0	0	0	0	0	0	0	2	0	2	0
0	1	0	0	2	1	2	0	2	2	2	0	2	0	2	0	0	2	2		0	0	0	2	0	2	0	0	2	2	2	0	2	2	2	0	0	2	0	0	0	0	0	0	0	0	2	0	2	0
0	1	0	0	2	1	2	0	2	2	2	0	2	0	2	0	0	2	2		0	0	0	2	0	2	0	0	2	2	2	0	2	2	2	0	0	2	0	0	0	0	0	0	0	0	2	0	0	0
0	1	0	0	2	1	2	0	2	2	2	0	2	0	2	0	0	2	2		0	0	0	2	0	2	0	0	2	2	2	0	2	2	2	0	0	2	0	0	0	0	0	0	0	0	2	0	0	0
0	0	0	0	2	1	2	0	2	2	2	0	2	0	2	0	0	2	2		0	0	0	2	0	2	0	0	2	2	2	0	2	2	2	0	0	2	0	0	0	0	0	0	0	0	2	0	0	0
0	1	0	0	2	1	2	0	2	2	2	0	2	0	2	0	0	2	2		0	0	0	2	0	2	0	0	2	2	2	0	2	2	2	0	0	2	0	0	0	0	0	0	0	0	2	0	0	0
0	1	0	0	2	1	2	0	2	2	2	0	2	0	2	0	0	2	2		0	0	0	2	0	2	0	0	2	2	2	0	2	2	2	0	0	2	0	0	0	0	0	0	0	0	2	0	0	0
0	1	0	0	2	1	2	0	2	2	2	0	2	0	2	0	0	2	2		0	0	0	2	0	2	0	0	2	2	2	0	2	2	2	0	0	2	0	0	0	0	0	0	0	0	2	0	0	0
0	1	0	0	2	1	2	0	2	2	2	0	2	0	2	0	0	2	2		0	0	0	2	0	2	0	0	2	2	2	0	2	2	2	0	0	2	0	0	0	0	0	0	0	0	0	0	0	0
0	1	0	0	0	1	2	0	2	2	2	0	2	0	2	0	0	2	2		0	0	0	2	0	2	0	0	2	2	2	0	2	2	2	0	0	2	0	0	0	0	0	0	0	0	0	0	0	0
0	1	0	0	0	1	2	0	2	2	2	0	2	0	2	0	0	2	2		0	0	0	2	0	2	0	0	2	2	2	0	2	2	2	0	0	2	0	0	0	0	0	0	0	0	0	0	0	0
0	1	0	0	0	1	2	0	2	2	2	0	2	0	2	0	0	2	2		0	0	0	2	0	2	0	0	2	2	2	0	2	2	2	0	0	2	0	0	0	0	0	0	0	0	0	0	0	0
0	1	0	0	0	0	2	0	2	2	2	0	2	0	2	0	0	2	2		0	0	0	2	0	2	0	0	2	2	2	0	2	2	2	0	0	2	0	0	0	0	0	0	0	0	0	0	0	0
0	1	0	0	0	0	2	0	2	2	2	0	2	0	2	0	0	2	2		0	0	0	2	0	2	0	0	2	2	2	0	2	2	2	0	0	2	0	0	0	0	0	0	0	0	0	0	0	0
0	1	0	0	0	0	2	0	2	2	2	0	2	0	2	0	0	2	2		0	0	0	2	0	2	0	0	2	2	2	0	2	2	2	0	0	2	0	0	0	0	0	0	0	0	0	0	0	0
0	0	0	0	0	0	2	0	2	2	2	0	2	0	2	0	0	2	2		0	0	0	2	0	2	0	0	2	2	2	0	2	2	2	0	0	2	0	0	0	0	0	0	0	0	0	0	0	0
0	1	0	0	0	0	2	0	2	2	2	0	2	0	2	0	0	2	2		0	0	0	2	0	2	0	0	2	2	2	0	2	2	2	0	0	2	0	0	0	0	0	0	0	0	0	0	0	0
0	1	0	0	0	0	2	0	2	2	2	0	2	0	2	0	0	2	2		0	0	0	2	0	2	0	0	2	2	2	0	2	2	2	0	0	2	0	0	0	0	0	0	0	0	0	0	0	0
0	1	0	0	0	0	2	0	2	2	2	0	2	0	2	0	0	2	2		0	0	0	2	0	2	0	0	2	2	2	0	2	2	2	0	0	2	0	0	0	0	0	0	0	0	0	0	0	0
0	1	0	0	0	0	2	0	2	2	2	0	2	0	2	0	0	2	2		0	0	0	2	0	2	0	0	2	2	2	2	2	2	2	0	0	2	0	0	0	0	0	0	0	0	0	0	0	0
0	1	0	0	0	0	2	0	2	2	2	0	2	0	2	0	0	2	2		0	0	0	2	0	2	0	0	2	2	2	2	2	2	2	0	0	2	0	0	0	0	0	0	0	0	0	0	0	0
0	1	0	0	0	0	2	0	2	2	2	0	2	0	2	0	0	2	2		0	0	0	2	0	2	0	0	2	2	2	2	2	2	2	0	0	2	0	0	0	0	0	0	0	0	0	0	0	0
0	1	0	0	0	0	0	0	2	2	2	0	2	0	2	0	0	2	2		0	0	0	2	0	2	0	0	2	2	2	2	2	2	2	0	0	2	0	0	0	0	0	0	0	0	0	0	0	0
0	1	0	0	0	0	0	0	2	2	2	0	2	0	2	0	0	2	2		0	0	0	2	0	2	0	0	2	2	2	2	2	2	2	0	0	2	0	0	0	0	0	0	0	0	0	0	0	0
0	1	0	0	0	0	0	0	2	2	2	0	2	0	2	0	0	2	2		0	0	0	2	0	2	0	0	2	2	2	2	2	2	2	0	0	2	0	0	0	0	0	0	0	0	0	0	0	0
0	1	0	0	0	0	0	0	2	2	2	0	2	0	2	0	0	2	2		0	0	0	2	0	2	0	0	2	2	0	2	2	2	2	0	0	2	0	0	0	0	0	0	0	0	0	0	0	0
0	1	0	0	0	0	0	0	2	2	2	0	2	0	2	0	0	2	2		0	0	0	2	0	2	0	0	2	0	0	2	2	2	2	0	0	2	0	0	0	0	0	0	0	0	0	0	0	0
0	1	0	0	0	0	0	0	2	2	2	0	2	0	2	0	0	2	2		0	0	0	2	0	2	0	0	2	0	0	2	2	2	2	0	0	2	0	0	0	0	0	0	0	0	0	0	0	0
0	1	0	0	0	0	0	0	2	2	2	0	2	0	2	0	0	2	2		0	0	0	2	0	2	0	0	2	0	0	2	2	2	2	0	0	2	0	0	0	0	0	0	0	0	0	0	0	0
0	1	0	0	0	0	0	0	2	2	2	0	0	0	2	0	0	2	2		0	0	0	2	0	2	0	0	2	0	0	2	2	2	2	0	0	2	0	0	0	0	0	0	0	0	0	0	0	0
0	1	0	0	0	0	0	0	2	2	2	0	0	0	2	0	0	2	2		0	0	0	2	0	2	0	0	2	0	0	2	2	2	2	0	0	2	0	0	0	0	0	0	0	0	0	0	0	0
0	1	0	0	0	0	0	0	2	2	2	0	0	0	2	0	0	2	2		0	2	0	2	0	2	0	0	2	0	0	2	2	2	2	0	0	2	0	0	0	0	0	0	0	0	0	0	0	0
0	1	0	0	0	0	0	0	2	2	2	0	0	0	2	0	0	2	2		0	2	0	2	0	2	0	0	2	0	0	2	2	2	2	0	0	2	0	0	0	0	0	0	0	0	0	0	0	0
0	1	0	0	0	0	0	0	2	2	2	0	0	0	2	0	0	2	2		0	2	0	2	0	2	0	0	2	0	0	2	2	2	2	0	0	2	0	0	0	0	0	0	0	0	0	0	0	0
0	1	0	0	0	0	0	0	2	2	2	0	0	0	2	0	0	2	2		0	2	0	2	0	2	0	0	2	0	0	2	2	2	2	0	0	2	0	0	0	0	0	0	0	0	0	0	0	0
0	1	0	0	0	0	0	0	2	2	2	0	0	0	2	0	0	2	2		0	2	0	2	0	2	0	0	2	0	0	2	2	2	2	0	0	2	0	0	0	0	0	0	0	0	0	0	0	0
0	1	0	0	0	0	0	0	2	2	2	0	0	0	2	0	0	2	2		0	2	0	2	0	2	0	0	2	0	0	2	2	2	2	0	0	2	0	0	0	0	0	0	0	0	0	0	0	0
0	1	0	0	0	0	0	0	2	2	2	0	0	0	2	0	0	2	2		0	2	0	2	0	2	0	0	2	0	0	2	2	2	2	0	0	2	0	0	0	0	0	0	0	0	0	0	0	0
0	1	0	0	0	0	0	0	2	2	2	0	0	0	2	0	0	2	2		0	2	0	2	0	2	0	0	2	0	0	2	2	2	2	0	0	2	0	0	0	0	0	0	0	0	0	0	0	0
0	1	0	0	0	0	0	0	2	2	2	0	0	0	2	0	0	2	2		0	2	0	2	0	2	0	0	2	0	0	2	2	2	2	0	0	2	0	0	0	0	0	0	0	0	0	0	0	0
0	1	0	0	0	0	0	0	0	2	2	0	0	0	2	0	0	2	2		0	2	0	2	0	2	0	0	2	0	0	2	2	2	2	0	0	2	0	0	0	0	0	0	0	0	0	0	0	0
0	1	0	0	0	0	0	0	0	2	0	0	0	0	2	0	0	2	2		0	2	0	2	0	2	0	0	2	0	0	2	2	2	2	0	0	2	0	0	0	0	0	0	0	0	0	0	0	0
0	0	0	0	0	0	0	0	0	2	0	0	0	0	2	0	0	2	2		0	2	0	2	0	2	0	0	2	0	0	2	2	2	2	0	0	2	0	0	0	0	0	0	0	0	0	0	0	0
0	1	0	0	0	0	0	0	0	2	0	0	0	0	2	0	0	2	2		0	2	0	2	0	2	0	0	2	0	0	2	2	2	2	0	0	2	0	0	0	0	0	0	0	0	0	0	0	0
0	1	0	0	0	0	0	0	0	2	0	0	0	0	2	0	0	2	2		0	2	0	2	0	2	0	0	2	0	0	2	2	2	2	0	0	2	0	0	0	0	0	0	0	0	0	0	0	0
0	1	0	0	0	0	0	0	0	2	0	0	0	0	2	0	0	0	2		0	2	0	2	0	2	0	0	2	0	0	2	2	2	2	0	0	2	0	0	0	0	0	0	0	0	0	0	0	0
0	1	0	0	0	0	0	0	0	2	0	0	0	0	2	0	0	0	2		0	2	0	2	0	2	0	0	2	0	0	2	2	2	2	0	0	2	0	0	0	0	0	0	0	0	0	0	0	0
0	1	0	0	0	0	0	0	0	2	0	0	0	0	2	0	0	0	2		0	2	0	2	0	2	0	0	2	0	0	2	2	2	2	0	0	2	0	0	0	0	0	0	0	0	0	0	0	0
0	1	0	0	0	0	0	0	0	2	0	0	0	0	0	0	0	0	2		0	2	0	2	0	2	0	0	2	0	0	2	2	2	2	0	0	2	0	0	0	0	0	0	0	0	0	0	0	0
0	1	0	0	0	0	0	0	0	2	0	0	0	0	0	0	0	0	2		0	2	0	2	0	2	0	0	2	0	0	2	2	2	2	0	0	2	0	0	0	0	0	0	0	0	0	0	0	0
0	1	0	0	0		0	0	0	2	0	0	0	0	0	0	0	0	2		0	2	0	2	0	2	0	0	2	0	0	2	2	2	2	0	0	2	0	0	0	0	0	0	0	0	0	0	0	0
0	1	0	0	0		0	0	0	2	0	0	0	0	0	0	0	0	2		0	2	0	2	0	2	0	0	2	0	0	2	2	2	2	0	0	2	0	0	0	0	0	0	0	0	0	0	0	0
0	1	0	0	0		0	0	0	2	0	0	0	0	0	0	0	0	2		0	2	0	2	0	2	0	0	0	0	0	2	2	2	2	0	0	2	0	0	0	0	0	0	0	0	0	0	0	0
0	0	0	0	0		0	0	0	2	0	0	0	0	0	0	0	0	2		0	2	0	2	0	2	0	0	0	0	0	2	2	2	2	0	0	2	0	0	0	0	0	0	0	0	0	0	0	0
0	0	0	0	0		0	0	0	2	0	0	0	0	0	0	0	0	2		0	2	0	2	0	2	0	0	0	0	0	2	2	2	2	0	0	2	0	0	0	0	0	0	0	0	0	0	0	0
0	0	0	0	0		0	0	0	2	0	0	0	0	0	0	0	0	2		0	2	0	2	0	2	0	0	0	0	0	0	2	2	2	0	0	2	0	0	0	0	0	0	0	0	0	0	0	0
0	0	0	0	0		0	0	0	2	0	0	0	0	0	0	0	0	2		0	2	0	2	0	2	0	0	0	0	0	0	2	2	2	0	0	2	0	0	0	0	0	0	0	0	0	0	0	0
0	0	0	0	0		0	0	0	2	0	0	0	0	0	0	0	0	2		0	2	0	2	0	2	0	0	0	0	0	0	2	2	2	0	0	2	0	0	0	0	0	0	0	0	0	0	0	0
0	0	0	0	0		0	0	0	2	0	0	0	0	0	0	0	0	2		0	2	0	2	0	2	0	0	0	0	0	0	2	2	2	0	0	2	0	0	0	0	0	0	0	0	0	0	0	0
0	0	0	0	0		0	0	0	2	0	0	0	0	0	0	0	0	2		0	2	0	2	0	2	0	0	0	0	0	0	2	2	2	0	0	2	0	0	0	0	0	0	0	0	0	0	0	0
0	0	0	0	0		0	0	0	2	0	0	0	0	0	0	0	0	0		0	2	0	2	0	2	0	0	0	0	0	0	2	2	2	0	0	2	0	0	0	0	0	0	0	0	0	0	0	0
0	0	0	0	0		0	0	0	2	0	0	0	0	0	0	0	0	0		0	2	0	2	0	2	0	0	0	0	0	0	2	2	2	0	0	2	0	0	0	0	0	0	0	0	0	0	0	0
0	0	0	0	0		0	0	0	0	0	0	0	0	0	0	0	0	0		0	2	0	2	0	2	0	0	0	0	0	0	2	2	2	0	0	0	0	0	0	0	0	0	0	0	0	0	0	0
0	0	0	0	0		0	0	0	0	0	0	0	0	0	0	0	0	0		0	2	0	2	0	2	0	0	0	0	0	0	2	2	2	0	0	0	0	0	0	0	0	0	0	0	0	0	0	0
0	0	0	0	0		0	0	0	0	0	0	0	0	0	0	0	0	0		0	2	0	2	0	2	0	0	0	0	0	0	2	2	2	0	0	0	0	0		0	0	0	0	0	0	0	0	0
0	0	0	0	0		0	0	0	0	0	0	0	0	0	0	0	0	0		0	2	0	2	0	2	0	0	0	0	0	0	2	2	2	0	0	0	0	0		0	0	0	0	0	0	0	0	0
0	0	0	0	0		0	0	0	0	0	0	0	0	0	0	0	0	0		0	2	0	2	0	2	0	0	0	0	0	0	2	2	0	0	0	0	0	0		0	0	0	0	0	0	0	0	0
0	0	0	0	0		0	0	0	0	0	0	0	0	0	0	0	0	0		0	2	0	2	0	2	0	0	0	0	0	0	2	2	0	0	0	0	0	0		0	0	0	0	0	0	0	0	0
0	0	0	0	0		0	0	0	0	0	0	0	0	0	0	0	0	0		0	2	0	2	0	2	0	0	0	0	0	0	2	2	0	0	0	0	0	0		0	0	0	0	0	0	0	0	0
0	0	0	2	0		0	0	0	0	0	0	0	0	0	0	0	0	0		0	2	0	2	0	2	0	0	0	0	0	0	2	2	0	0	0	0	0	0		0	0	0	0	0	0	0	0	0
0	0	0	2	0		0	0	0	0	0	0	0	0	0	0	0	0	0		0	2	0	2	0	2	0	0	0	0	0	0	2	2	0	0	0	0	0	0		0	0	0	0	0	0	0	0	0
0	0	0	2	0		0	0	0	0	0	0	0	0	0	0	0	0	0		0	2	0	2	0	2	0	0	0	0	0	0	2	2	0	0	0	0	0	0		0	0	0	0	0	0	0	0	0
0	0	0	2	0		0	0	0	0	0	0	0	0	0	0	0	0	0		0	0	0	2	0	2	0	0	0	0	0	0	2	2	0	0	0	0	0	0		0	0	0	0	0	0	0	0	0
0	0	0	2	0		0	0	0	0	0	0	0	0	0	0	0	0	0		0	0	0	2	0	2	0	0	0	0	0	0	2	2	0	0	0	0	0	0		0	0	0	0	0	0	0	0	0
0	0	0	2	0		0	0	0	0	0	0	0	0	0	0	0	0	0		0	0	0	2	0	2	0	0	0	0	0	0	2	2	0	0	0	0	0	0		0	0	0	0	0	0	0	0	0
0	0	0	2	0		0	0	0	0	0	0	0	0	0	0	0	0	0		0	0	0	2	0	2	0	0	0	0	0	0	2	2	0	0	0	0	0	0		0	0	0	0	0	0	0	0	0
0	0	0	2	0		0	0	0	0	0	0	0	0	0	0	0	0	0		0	0	0	2	0	2	0	0	0	0	0	0	2	2	0	0	0	0	0	0		0	0	0	0	0	0	0	0	0
0	0	0	2	0		0	0	0	0	0	0	0	0	0	0	0	0	0		0	0	0	2	0	2	0	0	0	0	0	0	2	2	0	0	0	0	0	0		0	0	0	0	0	0	0	0	0
0	0	0	2	0		0	0	0	0	0	0	0	0	0	0	0	0	0		0	0	0	2	0	2	0	0	0	0	0	0	2	2	0	0	0	0	0	0		0	0	0	0	0	0	0	0	0
0	0	0	2	0		0	0	0	0	0	0	0	0	0	0	0	0	0		0	0	0	2	0	2	0	0	0	0	0	0	2	2	0	0	0	0	0	0		0	0	0	0	0	0	0	0	0
0	0	0	2	0		0	0	0	0	0	0	0	0	0	0	0	0	0		0	0	0	2	0	2	0	0	0	0	0	0	2	2	0	0	0	0	0	0		0	0	0	0	0	0	0	0	0
0	0	0	2	0		0	0	0	0	0	0	0	0	0	0	0	0	0		0	0	0	2	0	2	0	0	0	0	0	0	2	2	0	0	0	0	0	0		0	0	0	0	0	0	0	0	0
0	0	0	2	0		0	0	0	0	0	0	0	0	0	0	0	0	0		0	0	0	2	0	2	0	0	0	0	0	0	2	2	0	0	0	0	0	0		0	0	0	0	0	0	0	0	0
0	0	0	2	0		0	0	0	0	0	0	0	0	0	0	0	0	0		0	0	0	2	0	2	0	0	0	0	0	0	2	2	0	0	0	0	0	0		0	0	0	0	0	0	0	0	0
0	0	0	2	0		0	0	0	0	0	0	0	0	0	0	0	0	0		0	0	0	2	0	2	0	0	0	0	0	0	2	2	0	0	0	0	0	0		0	0	0	0	0	0	0	0	0
0	0	0	2	0		0	0	0	0	0	0	0	0	0	0	0	0	0		0	0	0	2	0	2	0	0	0	0	0	0	2	2	0	0	0	0	0	0		0	0	0	0	0	0	0	0	0
0	0	0	2	0		0	0	0	0	0	0	0	0	0	0	0	0	0		0	0	0	2	0	2	0	0	0	0	0	0	2	2	0	0	0	0	0	0		0	0	0	0	0	0	0	0	0
0	0	0	2	0		0	0	0	0	0	0	0	0	0	0	0	0	0		0	0	0	2	0	2	0	0	0	0	0	0	2	2	0	0	0	0	0	0		0	0	0	0	0	0	0	0	0
0	0	0	2	0		0	0	0	0	0	0	0	0	0	0	0	0	0		0	0	0	2	0	2	0	0	0	0	0	0	2	2	0	0	0	0	0	0		0	0	0	0	0	0	0	0	0
0	0	0	2	0		0	0	0	0	0	0	0	0	0	0	0	0	0		0	0	0	2	0	2	0	0	0	0	0	0	2	2	0	0	0	0	0	0		0	0	0	0	0	0	0	0	0
0	0	0	2	0		0	0	0	0	0	0	0	0	0	0	0	0	0		0	0	0	2	0	2	0	0	0	0	0	0	2	2	0	0	0	0	0	0		0	0	0	0	0	0	0	0	0
0	0	0	2	0		0	0	0	0	0	0	0	0	0	0	0	0	0		0	0	0	2	0	2	0	0	0	0	0	0	2	2	0	0	0	0	0	0		0	0	0	0	0	0	0	0	0
0	0	0	2	0		0	0	0	0	0	0	0	0	0	0	0	0	0		0	0	0	2	0	2	0	0	0	0	0	0	2	2	0	0	0	0	0	0		0	0	0	0	0	0	0	0	0
0	0	0	2	0		0	0	0	0	0	0	0	0	0	0	0	0	0		0	0	0	2	0	2	0	0	0	0	0	0	2	2	0	0	0	0	0	0		0	0	0	0	0	0	0	0	0
0	0	0	2	0		0	0	0	0	0	0	0	0	0	0	0	0	0		0	0	0	2	0	2	0	0	0	0	0	0	2	2	0	0	0	0	0	0		0	0	0	0	0	0	0	0	0
0	0	0	2	0		0	0	0	0	0	0	0	0	0	0	0	0	0		0	0	0	2	0	2	0	0	0	0	0	0	2	2	0	0	0	0	0	0		0	0	0	0	0	0	0	0	0
0	0	0	2	0		0	0	0	0	0	0	0	0	0	0	0	0	0		0	0	0	2	0	0	0	0	0	0	0	0	2	2	0	0	0	0	0	0		0	0	0	0	0	0	0	0	0
0	0	0	2	0		0	0	0	0	0	0	0	0	0	0	0	0	0		0	0	0	2	0	0	0	0	0	0	0	0	2	2	0	0	0	0	0	0		0	0	0	0	0	0	0	0	0
0	0	0	2	0		0	0	0	0	0	0	0	0	0	0	0	0	0		0	0	0	2	0	0	0	0	0	0	0	0	2	2	0	0	0	0	0	0		0	0	0	0	0	0	0	0	0
0	0	0	2	0		0	0	0	0	0	0	0	0	0	0	0	0	0		0	0	0	2	0	0	0	0	0	0	0	0	2	2	0	0	0	0	0	0		0	0	0	0	0	0	0	0	0
0	0	0	2	0		0	0	0	0	0	0	0	0	0	0	0	0	0		0	0	0	2	0	0	0	0	0	0	0	0	2	2	0	0	0	0	0	0		0	0	0	0	0	0	0	0	0
0	0	0	2	0		0	0	0	0	0	0	0	0	0	0	0	0	0		0	0	0	2	0	0	0	0	0	0	0	0	2	2	0	0	0	0	0	0		0	0	0	0	0	0	0	0	0
0	0	0	2	0		0	0	0	0	0	0	0	0	0	0	0	0	0		0	0	0	2	0	0	0	0	0	0	0	0	2	2	0	0	0	0	0	0		0	0	0	0	0	0	0	0	0
0	0	0	2	0		0	0	0	0	0	0	0	0	0	0	0	0	0		0	0	0	2	0	0	0	0	0	0	0	0	2	2	0	0	0	0	0	0		0	0	0	0	0	0	0	0	0
0	0	0	2	0		0	0	0	0	0	0	0	0	0	0	0	0	0		0	0	0	2	0	0	0	0	0	0	0	0	2	2	0	0	0	0	0	0		0	0	0	0	0	0	0	0	0
0	0	0	2	0		0	0	0	0	0	0	0	0	0	0	0	0	0		0	0	0	2	0	0	0	0	0	0	0	0	2	2	0	0	0	0	0	0		0	2	0	0	0	0	0	0	0
0	0	0	2	0		0	0	0	0	0	0	0	0	0	0	0	0	0		0	0	0	2	0	0	0	0	0	0	0	0	2	2	0	0	0	0	0	0		0	2	0	0	0	0		0	0
0	0	0	2	0		0	0	0	0	0	0	0	0	2	0	0	0	0		0	0	0	2	0	0	0	0	0	0	0	0	2	2	0	0	0	2	0	0		0	2	0	0	0	0		0	0
0	0	0	2	0		0	0	0	0	0	0	0	0	2	0	0	0	0		0	0	0	2	0	0	0	0	0	0	0	0	2	2	0	0	0	2	0	0		0	2	0	0	0	0		0	0
0	0	0	2	0		0	0	0	0	0	0	0	0	2	0	0	0	0		0	0	0	2	0	0	0	0	0	0	0	0	2	2	0	0	0	2	0	0		0	2	0	0	0	0		0	0
0	0	0	2	0		0	0	0	0	0	0	0	0	2	0	0	0	0		0	0	0	2	0	0	0	0	0	0	0	0	2	2	0	0	0	2	0	0		0	2	0	0	0	0		0	0
0	0	0	2	0		0	0	0	0	0	0	0	0	2	0	0	0	0		0	0	0	2	0	0	0	0	0	0	0	0	2	2	0	0	0	2	0	0		0	2	0	0	0	0		0	0
0	0	0	2	0		0	0	0	0	0	0	0	0	2	0	0	0	0		0	0	0	2	0	0	0	0	0	0	0	0	2	2	0	0	0	2	0	0		0	2	0	0	0	0		0	0
0	0	0	2	0		0	0	0	0	0	0	0	0	2	0	0	0	0		0	0	0	2	0	0	0	0	0	0	0	0	2	2	0	0	0	2	0	0		0	2	0	0	0	0		0	0
0	0	0	2	0		0	0	0	0	0	0	0	0	2	0	0	0	0		0	0	0	2	0	0	0	0	0	0	0	0	2	2	0	0	0	2	0	0		0	2	0	0	0	0		0	0
0	0	0	2	0		0	0	0	0	0	0	0	0	2	0	0	0	0		0	0	0	2	0	0	0	0	0	0	0	0	2	2	0	0	0	2	0	0		0	2	0	0	0	0		0	0
0	0	0	2	0		0	0	0	0	0	0	0	0	2	0	0	0	0		0	0	0	2	0	0	0	0	0	0	0	0	2	2	0	0	0	2	0	0		0	2	0	0	0	0		0	0
0	0	0	2	0		0	0	0	0	0	0	0	0	2	0	0	0	0		0	0	0	2	0	0	0	0	0	0	0	0	2	2	0	0	0	2	0	2		0	2	0	0	0	0		0	0
0	0	0	2	0		0	0	0	0	0	0	0	0	2	0	0	0	0		0	0	0	2	0	0	0	0	0	0	0	0	2	2	0	0	0	2	0	2		0	2	0	0	0	0		0	0
0	0	0	2	0		0	0	0	0	0	0	0	0	2	0	0	0	0		0	0	0	2	0	0	0	0	0	0	0	0	2	2	0	0	0	2	0	2		0	2	0	0	0	0		0	0
0	0	0	2	0		0	0	0	0	0	0	0	0	2	0	0	0	0		0	0	0	2	0	0	0	0	0	0	0	0	2	2	0	0	0	2	0	2		0	2	0	0	0	0		0	0
0	0	0	2	0		0	0	0	0	0	0	0	0	2	0	0	0	0		0	0	0	2	0	0	0	0	0	0	0	0	2	2	0	0	0	2	0	2		0	2	0	0	1	0		0	0
0	0	0	2	0		0	0	0	0	0	0	0	0	2	0	0	0	0		0	0	0	2	0	0	0	0	0	0	0	0	2	2	0	0	0	2	0	2		0	2	0	0	1	0		0	0
0	0	0	2	0		0	0	0	0	0	0	0	0	2	0	0	0	0		0	0	0	2	0	0	0	0	0	0	0	0	2	2	0	0	0	2	0	2		0	2	0	0	1	0		0	0
0	0	0	2	0		0	0	0	0	0	0	0	0	2	0	0	0	0		0	0	0	2	0	0	0	0	0	0	0	0	2	2	0	0	0	2	0	2		0	2	0	0	1	0		0	0
0	0	0	2	0		0	0	0	0	0	0	0	0	2	0	0	0	0		0	0	0	2	0	0	0	0	0	0	0	0	2	2	0	0	0	2	0	2		0	2	0	0	1	0		0	0
0	0	0	2	0		0	0	0	0	0	0	0	0	2	0	0	0	0		0	0	0	2	0	0	0	0	0	0	0	0	2	2	0	0	0	2	0	2		0	2	0	0	1	0		0	0
0	0	0	2	0		0	0	0	0	0	0	0	0	2	0	0	0	0		0	0	0	2	0	0	0	0	0	0	0	0	2	2	0	0	0	2	0	2		0	2	0	0	1	0		0	0
0	0	0	2	0		0	0	0	0	0	0	0	0	2	0	0	0	0		0	0	0	2	0	0	0	0	0	0	0	0	2	2	0	0	0	2	0	2		0	2	0	0	1	0		0	0
0	0	0	2	0		0	0	0	0	0	0	0	0	2	0	0	0	0		0	0	0	2	0	0	0	0	0	0	0	0	2	2	0	0	0	2	0	2		0	2	0	0	1	0		0	0
0	0	0	2	0		0	0	0	0	0	0	0	0	2	0	0	0	0		2	0	0	2	0	0	0	0	0	0	0	0	2	2	0	0	0	2	0	2		0	2	0	0	1	0		0	0
0	0	0	2	0		0	0	0	0	0	0	0	0	2	0	0	0	0		2	0	0	2	0	0	0	0	0	0	0	0	2	2	0	0	0	2	0	2		0	2	0	0	1	0		0	0
0	0	0	2	0		0	0	0	0	0	0	0	0	2	0	0	0	0		2	0	0	2	0	0	0	0	0	0	0	0	2	2	0	0	0	2	0	2		0	2	0	0	1	0		0	0
0	0	0	2	0		0	0	0	0	0	0	0	0	2	0	0	0	0		2	0	0	2	0	0	0	0	0	0	0	0	0	2	0	0	0	2	0	2		0	2	0	0	1	0		0	0
0	0	0	2	0		0	0	0	0	0	0	0	0	2	0	0	0	0		2	0	0	2	0	0	0	0	0	0	0	0	0	2	0	0	0	2	0	2		0	2	0	0	1	0		0	0
0	0	0	2	0		0	0	0	0	0	0	0	0	2	0	0	0	0		2	0	0	2	0	0	0	0	0	0	0	0	0	2	0	0	0	2	0	2		0	2	0	0	1	0		0	0
0	0	0	2	0		0	0	0	0	0	0	0	0	2	0	0	0	0		2	0	0	2	0	0	0	0	0	0	0	0	0	2	0	0	0	2	0	2		0	2	0	0	1	0		0	0
0	0	0	0	0		0	0	0	0	0	0	0	0	2	0	0	0	0		2	0	0	2	0	0	0	0	0	0	0	0	0	2	0	0	0	2	0	2		0	2	0	0	1	0		0	0
0	0	0	0	0		0	0	0	0	0	0	0	0	2	0	0	0	0		2	0	0	2	0	0	0	0	0	0	0	0	0	2	0	0	0	2	0	2		0	2	0	0	1	0		0	0
0	0	0	0	0		0	0	0	0	0	0	0	0	2	0	0	0	0		2	0	0	2	0	0	0	0	0	0	0	0	0	2	0	0	0	2	0	2		0	2	0	0	1	0		0	0
0	0	0	0	0		0	0	0	0	0	0	0	0	2	0	0	0	0		2	0	0	2	0	0	0	0	0	0	0	0	0	2	0	0	0	2	0	2		0	2	0	0	1	0		0	0
0	2	0	0	0		0	0	0	0	0	0	0	0	2	0	0	0	0		2	0	0	2	0	0	0	0	0	0	0	0	0	2	0	0	0	2	0	2		0	2	0	0	1	0		0	0
0	2	0	0	0		0	0	0	0	0	0	0	0	2	0	0	0	0		2	0	0	2	0	0	0	0	0	0	0	0	0	2	0	0	0	2	0	2		0	2	0	0	1	0		0	0
0	2	0	0	0		0	0	0	0	0	0	0	0	2	0	0	0	0		2	0	0	2	0	0	0	0	0	0	0	0	0	2	0	0	0	2	0	2		0	2	0	0	1	0		0	0
0	2	0	0	0		0	0	0	0	0	0	0	0	2	0	0	0	0		2	0	0	2	0	0	0	0	0	0	0	0	0	2	0	0	0	2	0	2		0	2	0	0	1	0		0	0
0	2	0	0	0		0	0	0	0	0	0	0	0	2	0	0	0	0		2	0	0	2	0	0	0	0	0	0	0	0	0	2	0	0	0	2	0	2		0	2	0	0	1	0		0	0
0	2	0	0	0		0	0	0	0	0	0	0	0	2	0	0	0	0		2	2	0	2	0	0	0	0	0	0	0	0	0	2	0	0	0	2	0	2		0	2	0	0	1	0		0	0
0	2	0	0	0		0	0	0	0	0	0	0	0	2	0	0	0	0		2	2	0	2	0	0	0	0	0	0	0	0	0	2	0	0	0	2	0	2		0	2	0	0	1	0		0	0
0	2	0	0	0		0	0	0	0	0	0	0	0	2	0	0	0	0		2	2	0	2	0	0	0	0	0	0	0	0	0	2	0	0	0	2	0	2		0	2	0	0	1	0		0	0
0	2	0	0	0		0	0	0	0	0	0	0	0	2	0	0	0	0		2	2	0	2	0	0	0	0	0	0	0	0	0	2	0	0	0	2	0	2		0	2	0	0	1	0		0	0
0	2	0	0	0		0	0	0	0	0	0	0	0	2	0	0	0	0		2	2	0	2	0	0	0	0	0	0	0	0	0	2	0	0	0	2	0	2		0	2	0	0	1	0		0	0
0	2	0	0	0		0	0	0	0	0	0	0	0	2	0	0	0	0		2	2	0	2	0	0	0	0	0	0	0	0	0	2	0	0	0	2	0	2		0	2	0	0	1	0		0	0
0	2	0	0	0		0	0	0	0	0	0	0	0	2	0	0	0	0		2	2	0	2	0	0	0	0	0	0	0	0	0	2	0	0	0	2	0	2		0	2	0	0	1	0		0	0
0	2	0	0	0		0	0	0	0	0	0	0	0	2	0	0	0	0		2	2	0	2	0	0	0	0	0	0	0	0	0	2	0	0	0	2	0	2		0	2	0	0	1	0		0	0
0	2	0	0	0		0	0	0	0	0	0	0	0	2	0	0	0	0		2	2	0	2	0	0	0	0	0	0	0	0	0	2	0	0	0	2	0	2		0	2	0	0	1	0		0	0
0	2	0	0	0		0	0	0	0	0	0	0	0	2	0	0	0	0		2	2	0	2	0	0	0	0	0	0	0	0	0	2	0	0	0	2	0	2		0	2	0	0	1	0		0	0
0	2	0	0	0		0	0	0	0	0	0	0	0	2	0	0	0	0		2	2	0	2	0		0	0	0	0	0	0	0	2	0	0	0	2	0	2		0	2	0	0	1	0		0	0
0	2	0	0	0		0	0	0	0	0	0	0	0	2	0	0	0	0		2	2	0	2	0		0	0	0	0	0	0	0	2	0	0	0	2	0	2		0	2	0	0	1	0		0	0
0	2	0	0	0		0	0	0	0	0	0	0	0	2	0	0	0	0		2	2	0	2	0		0	0	0	0	0	0	0	2	0	0	0	2	0	2		0	2	0	0	1	0		0	0
0	2	0	0	0		0	0	0	0	0	0	0	0	2	0	0	0	0		2	2	0	2	0		0	0	0	0	0	0	0	2	0	0	0	2	0	2		0	2	0	0	1	0		0	0
0	2	0	0	0		0	0	0	0	0	0	0	0	2	0	0	0	0		2	2	0	2	0		0	0	0	0	0	0	0	2	0	0	0	2	0	2		0	2	0	0	1	0		0	0
0	2	0	0	0		0	0	0	0	0	0	0	0	2	0	0	0	0		2	2	0	2	0		0	0	0	0	0	0	0	2	0	0	0	2	0	2		0	2	0	0	1	0		0	0
0	2	0	0	0		0	0	0	0	0	0	0	0	2	0	0	0	0		2	0	0	2	0		0	0	0	0	0	0	0	2	0	0	0	2	0	0		0	2	0	0	1	0		0	0
0	2	0	0	0		0	0	0	0	0	0	0	0	2	0	0	0	0		2	0	0	2	0		0	0	0	0	0	0	0	2	0	0	0	2	0	0		0	2	0	0	1	0		0	0
0	2	0	0	0		0	0	0	0	0	0	0	0	2	0	0	0	0		2	0	0	2	0		0	0	0	0	0	0	0	2	0	0	0	2	0	0		0	2	0	0	1	0		0	0
0	2	0	0	0		0	0	0	0	0	0	0	0	2	0	0	0	0		2	0	0	2	0		0	0	0	0	0	0	0	2	0	0	0	2	0	0		0	2	0	0	1	0		0	0
0	2	0	0	0		0	0	0	0	0	0	0	0	2	0	0	0	0		2	0	0	2	0		0	0	0	0	0	0	0	2	0	0	0	2	0	0		0	2	0	0	1	0		0	0
0	2	0	0	0		0	0	0	0	0	0	0	0	2	0	0	0	0		2	0	0	2	0		0	0	0	0	0	0	0	2	0	0	0	2	0	0		0	2	0	0	1	0		0	0
0	0	0	0	0		0	0	0	0	0	0	0	0	2	0	0	0	0		2	0	0	2	0		0	0	0	0	0	0	0	2	0	0	0	2	0	0		0	2	0	0	1	0		0
0	0	0	0	0		0	0	0	0	0	0	0	0	2	0	0	0	0		2	0	0	2	0		0	0	0	0	0	0	0	2	0	0	0	2	0	0		0	2	0	0	1	0		0
0	0	0	0	0		0	0	0	0	0	0	0	0	2	0	0	0	0		2	0	0	2	0		0	0	0	0	0	0	0	2	0	0	0	2	0	0		0	2	0	0	1	0		0
0	0	0	0	0		0	0	0	0	0	0	0	0	2	0	0	0	0		2	0	0	2	0		0	0	0	0	0	0	0	2	0	0	0	2	0	0		0	2	0	0	1	0		0
0	0	0	0	0		0	0	0	0	0	0	0	0	2	0	0	0	0		2	0	0	2	0		0	0	0	0	0	0	0	2	0	0	0	2	0	0		0	2	0	0	1	0		0
0	0	0	0	0		0	0	0	0	0	0	0	0	2	0	0	0	0		2	0	0	2	0		0	0	0	0	0	0	0	2	0	0	0	2	0	0		0	2	0	0	1	0		0
0	0	0	0	0		0	0	0	0	0	0	0	0	2	0	0	0	0		2	0	0	2	0		0	0	0	0	0	0	0	2	0	0	0	2	0	0		0	2	0	0	0	0
0	0	0	0	0		0	0	0	0	0	0	0	0	2	0	0	0	0		0	0	0	2	0		0	0	0	0	0	0	0	2	0	0	0	2	0	0		0	2	0	0	0	0
0	0	0	0	0		0	0	0	0	0	0	0	0	2	0	0	0	0		0	0	0	2	0		0	0	0	0	0	0	0	0	0	0	0	2	0	0		0	2	0	0	0	0
0	0	0	0	0		0	0	0	0	0	0	0	0	2	0	0	0	0		0	0	0	2	0		0	0	0	0	0	0	0	0	0	0	0	2	0	0		0	2	0	0	0	0
0	0	0	0	0		0	0	0	0	0	0	0	0	2	0	0	0	0		0	0	0	2	0		0	0	0	0	0	0	0	0	0	0	0	2	0	0		0	0	0	0	0	0
0	0	0	0	0		0	0	0	0	0	0	0	0	2	0	0	0	0		0	0	0	2	0		0	0	0	0	0	0	0	0	0	0	0	0	0	0		0	0	0	0	0	0
0	0	0	0	0		0	0	0	0	0	0	0	0	2	0	0	0	0		0	0	0	2	0		0	0	0	0	0	0	0	0	0	0	0	0	0	0		0	0	0	0	0	0
0	0	0	0	0		0	0	0	0	0	0	0	0	2	0	0	0	0		0	0	0	2	0		0	0	0	0	0	0	0	0	0	0	0	0	0	0		0	0	0	0	0	0
0	0	0	0	0		0	0	0	0	0	0	0	0	2	0	0	0	0		0	0	0	2	0		0	0	0	0	0	0	0	0	0	0	0	0	0	0		0	0	0	0	0	0
0	0	0	0	0		0	0	0	0	0	0	0	0	2	0	0	0	0		0	0	0	2	0		0	0	0	0	0	0	0	0	0	0	0	0	0	0		0	0	0	0	0	0
0	0	0	0	0		0	0	0	0	0	0	0	0	2	0	0	0	0		0	0	0	2	0		0	0	0	0	0	0	0	0	0	0	0	0	0	0		0	0	0	0	0	0
0	0	0	0	0		0	0	0	0	0	0	0	0	2	0	0	0	0		0	0	0	2	0		0	0	0	0	0	0	0	0	0	0	0	0	0	0		0	0	0	0	0	0
0	0	0	0	0		0	0	0	0	0	0	0	0	2	0	0	0	0		0	0	0	2	0		0	0	0	0	0	0	0	0	0	0	0	0	0	0		0	0	0	0	0	0
0	0	0	0	0		0	0	0	0	0	0	0	0	2	0	0	0	0		0	0	0	2	0		0	0	0	0	0	0	0	0	0	0	0	0	0	0		0	0	0	0	0	0
0	0	0	0	0		0	0	0	0	0	0	0	0	2	0	0	0	0		0	0	0	2	0		0	0	0	0	0	0	0	0	0	0	0	0	0	0		0	0	0	0	0	0
0	0	0	0	0		0	0	0	0	0	0	0	0	2	0	0	0	0		0	0	0	2	0		0	0	0	0	0	0	0	0	0	0	0	0	0	0		0	0	0	0	0	0
0	0	0	0	0		0	0	0	0	0	0	0	0	2	0	0	0	0		0	0	0	2	0		0	0	0	0	0	0	0	0	0	0	0	0	0	0		0	0	0	0	0	0
0	0	0	0	0		0	0	0	0	0	0	0	0	2	0	0	0	0		0	0	0	2	0		0	0	0	0	0	0	0	0	0	0	0	0	0	0		0	0	0	0	0	0
0	0	0	0	0		0	0	0	0	0	0	0	0	2	0	0	0	0		0	0	0	2	0		0	0	0	0	0	0	0	0	0	0	0	0	0	0		0	0	0	0	0	0
0	0	0	0	0		0	0	0	0	0	0	0	0	2	0	0	0	0		0	0	0	2	0		0	0	0	0	0	0	0	0	0	0	0	0	0	0		0	0	0	0	0	0
0	0	0	0	0		0	0	0	0	0	0	0	0	2	0	0	0	0		0	0	0	2	0		0	0	0	0	0	0	0	0	0	0	0	0	0	0		0	0	0	0	0	0
0	0	0	0	0		0	0	0	0	0	0	0	0	2	0	0	0	0		0	0	0	2	0		0	0	0	0	0	0	0	0	0	0	0	0	0	0		0	0	0	0	0	0
0	0	0	0	0		0	0	0	0	0	0	0	0	2	0	0	0	0		0	0	0	2	0		0	0	0	0	0	0	0	0	0	0	0	0	0	0		0	0	0	0	0	0
0	0	0	0	0		0	0	0	0	0	0	0	0	2	0	0	0	0		0	0	0	2	0		0	0	0	0	0	0	0	0	0	0	0	0	0	0		0	0	0	0	0	0
0	0	0	0	0		0	0	0	0	0	0	0	0	0	0	0	0	0		0	0	0	2	0		0	0	0	0	0	0	0	0	0	0	0	0	0	0		0	0	0	0	0	0
0	0	0	0	0		0	0	0	0	0	0	0	0	0	0	0	0	0		0	0	0	2	0		0	0	0	0	0	0	0	0	0	0	0	0	0	0		0	0	0	0	0	0
0	0	0	0	0		0	0	0	0	0	0	0	0	0	0	0	0	0		0	0	0	2	0		0	0	0	0	0	0	0	0	0	0	0	0	0	0		0	0	0	0	0	0
0	0	0	0	0		0	0	0	0	0	0	0	0	0	0	0	0	0		0	0	0	2	0		0	0	0	0	0	0	0	0	0	0	0	0	0	0		0	0	0	0	0	0
0	0	0	0	0		0	0	0	0	0	0	0	0	0	0	0	0	0		0	0	0	2	0		0	0	0	0	0	0	0	0	0	0	0	0	0	0		0	0	0	0	0	0
0	0	0	0	0		0	0	0	0	0	0	0	0	0	0	0	0	0		0	0	0	2	0		0	0	0	0	0	0	0	0	0	0	0	0	0	0		0	0	0	0	0	0
0	0	0	0	0		0	0	0	0	0	0	0	0	0	0	0	0	0		0	0	0	2	0		0	0	0	0	0	0	0	0	0	0	0	0	0	0		0	0	0	0	0	0
0	0	0	0	0		0	0	0	0	0	0	0	0	0	0	0	0	0		0	0	0	2	0		0	0	2	0	0	0	0	0	0	0	0	0	0	0		0	0	0	0	0	0
0	0	0	0	0		0	0	0	0	0	0	0	0	0	0	0	0	0		0	0	0	2	0		0	0	2	0	0	0	0	0	0	0	0	0	0	0		0	0	0	0	0	0
0	0	0	0	0		0	0	0	0	0	0	0	0	0	0	0	0	0		0	0	0	2	0		0	0	2	0	0	0	0	0	0	0	0	0	0	0		0	0	0	0	0	0
0	0	0	0	0		0	0	0	0	0	0	0	0	0	0	0	0	0		0	0	0	2	0		0	0	2	0	0	0	0	0	0	0	0	0	0	0		0	0	0	0	0	0
0	0	0	0	0		0	0	0	0	0	0	0	0	0	0	0	0	0		0	0	0	2	0		0	0	2	0	0	0	0	0	0	0	0	0	0	0		0	0	0	0	0	0
0	0	0	0	0		0	0	0	0	0	0	0	0	0	0	0	0	0		0	0	0	2	0		0	0	2	0	0	0	0	0	0	0	0	0	0	0		0	0	0	0	0	0
0	0	0	0	0		0	0	0	0	0	0	0	0	0	0	0	0	0		0	0	0	2	0		0	0	2	0	0	0	0	0	0	0	0	0	0	0		0	0	0	0	0	0
0	0	0	0	0		0	0	0	0	0	0	0	0	0	0	0	0	0		0	0	0	2	0		0	0	2	0	0	0	0	0	0	0	0	0	0	0		0	0	0	0	0	0
0	0	0	0	0		0	0	0	0	0	0	0	0	0	0	0	0	0		0	0	0	2	0		0	0	2	0	0	0	0	0	0	0	0	0	0	0		0	0	0	0	0	0
0	0	0	0	0		0	0	0	0	0	0	0	0	0	0	0	0	0		0	0	0	2	0		0	0	2	0	0	0	0	0	0	0	0	0	0	0		0	0	0	0	0	0
0	0	0	0	0		0	0	0	0	0	0	0	0	0	0	0	0	0		0	0	0	2	0		0	0	2	0	0	0	0	0	0	0	0	0	0	0		0	0	0	0	0	0
0	0	0	0	0		0	0	0	0	0	0	0	0	0	0	0	0	0		0	0	0	2	0		0	0	2	0	0	0	0	0	0	0	0	0	0	0		0	0	0	0	0	0
0	0	0	0	0		0	0	0	0	0	0	0	0	0	0	0	0	0		0	0	0	2	0		0	0	2	0	0	0	0	0	0	0	0	0	0	0		0	0	0	0	0	0
0	0	0	0	0		0	0	0	0	0	0	0	0	0	0	0	0	0		0	0	0	2	0		0	0	2	0	0	0	0	0	0	0	0	0	0	0		0	0	0	0	0	0
0	0	0	0	0		0	0	0	0	0	0	0	0	0	0	0	0	0		0	0	0	2	0		0	0	2	0	0	0	0	0	0	0	0	0	0	0		0	0	0	0	0	0
0	0	0	0	0		0	0	0	0	0	0	0	0	0	0	0	0	0		0	0	0	2	0		0	0	2	0	0	0	0	0	0	0	0	0	0	0		0	0	0	0	0	0
0	0	0	0	0		0	0	0	0	0	0	0	0	0	0	0	0	0		0	0	0	2	0		0	0	2	0	0	0	0	0	0	0	0	0	0	0		0	0	0	0	0	0
0	0	0	0	0		0	0	0	0	0	0	0	0	0	0	0	0	0		0	0	0	2	0		0	0	2	0	0	0	0	0	0	0	0	0	0	0		0	0	0	0	0	0
0	0	0	0	0		0	0	0	0	0	0	0	0	0	0	0	0	0		0	0	0	2	0		0	0	2	0	0	0	0	0	0	0	0	0	0	0		0	0	0	0	0	0
0	0	0	0	0		0	0	0	0	0	0	0	0	0	0	0	0	0		0	0	0	2	0		0	0	2	0	0	0	0	0	0	0	0	0	0	0		0	0	0	0	0	0
0	0	0	0	0		0	0	0	0	0	0	0	0	0	0	0	0	0		0	0	0	2	0		0	0	2	0	0	0	0	0	0	0	0	0	0	0		0	0	0	0	0	0
0	0	0	0	0		0	0	0	0	0	0	0	0	0	0	0	0	0		0	0	0	2	0		0	0	2	0	0	0	0	0		0	0	0	0	0		0	0	0	0	0	0
0	0	0	0	0		0	0	0	0	0	0	0	0	0	0	0	0	0		0	0	0	2	0		0	0	2	0	0	0	0	0		0	0	0	0	0		0	0	0	0	0	0
0	0	0	0	0		0	0	0	0	0	0	0	0	0	0	0	0	0		0	0	0	2	0		0	0	2	0	0	0	0	0		0	0	0	0	0		0	0	0	0	0	0
0	0	0	0	0		0	0	0	0	0	0	0	0	0	0	0	0	0		0	0	0	2	0		0	0	2	0	0	0	0	0		0	0	0	0	0		0	0	0	0	0	0
0	0	0	0	0		0	0	0	0	0	0	0	0	0	0	0	0	0		0	0	0	2	0		0	0	2	0	0	0	0	0		0	0	0	0	0		0	0	0	0	0	0
0	0	0	0	0		0	0	0	0	0	0	0	0	0	0	0	0	0		0	0	0	2	0		0	0	2	0	0	0	0	0		0	0	0	0	0		0	0	0	0	0	0
0	0	0	0	0		0	0	0	0	0	0	0	0	0	0	0	0	0		0	0	0	2	0		0	0	2	0	0	0	0	0		0	0	0	0	0		0	0	0	0	0	0
0	0	0	0	0		0	0	0	0	0	0	0	0	0	0	0	0	0		0	0	0	2	0		0	0	2	0	0	0	0	0		0	0	0	0	0		0	0	0	0	0	0
0	0	0	0	0		0	0	0	0	0	0	0	0	0	0	0	0	0		0	0	0	2	0		0	0	2	0	0	0	0	0		0	0	0	0	0		0	0	0	0	0	0
0	0	0	0	0		0	0	0	0	0	0	0	0	0	0	0	0	0		0	0	0	2	0		0	0	2	0	0	0	0	0		0	0	0	0	0		0	0	0	0	0	0
0	0	0	0	0		0	0	0	0	0	0	0	0	0	0	0	0	0		0	0	0	2	0		0	0	2	0	0	0	0	0		0	0	0	0	0		0	0	0	0	0	0
0	0	0	0	0		0	0	0	0	0	0	0	0	0	0	0	0	0		0	0	0	2	0		0	0	2	0	0	0	0	0		0	0	0	0	0		0	0	0	0	0	0
0	0	0	0	0		0	0	0	0	0		0	0	0	0	0	0	0		0	0	0	2	0		0	0	2	0	0	0	0	0		0	0	0	0	0		0	0	0	0	0	0
0	0	0	0	0		0	0	0	0	0		0	0	0	0	0	0	0		0	0	0	2	0		0	0	2	0	0	0	0	0		0	0	0	0	0		0	0	0	0	0	0
0	0	0	0	0		0	0	0	0	0		0	0	0	0	0	0	0		0	0	0	2	0		0	0	2	0	0	0	0	0		0	0	0	0	0		0	0	0	0	0	0
0	0	0	0	0		0	0	0	0	0		0	0	0	0	0	0	0		0	0	0	2	0		0	0	2	0	0	0	0	0		0	0	0	0	0		0	0	0	0	0	0
0	0	0	0	0		0	0	0	0	0		0	0	0	0	0	0	0		0	0	0	2	0		0	0	2	0	0	0	0	0		0	0	0	0	0		0	0	0	0	0	0
0	0	0	0	0		0	0	0	0	0		0	0	0	0	0	0	0		0	0	0	2	0		0	0	2	0	0	0	0	0		0	0	0	0	0		0	0	0	0	0	0
0	0	0	0	0		0	0	0	0	0		0	0	0	0	0	0	0		0	0	0	2	0		0	0	2	0	0	0	0	0		0	0	0	0	0		0	0	0	0	0	0
0	0	0	0	0		0	0	0	0	0		0	0	0	0	0	0	0		0	0	0	2	0		0	0	2	0	0	0	0	0		0	0	0	0	0		0	0	0	0	0	0
0	0	0	0	0		0	0	0	0	0		0	0	0	0	0	0	0		0	0	0	2	0		0	0	2	0	0	0	0	0		0	0	0	0	0		0	0	0	0	0	0
0	0	0	0	0		0	0	0	0	0		0	0	0	0	0	0	0		0	0	0	2	0		0	0	2	0	0	0	0	0		0	0	0	0	0		0	0	0	0	0	0
0	0	0	0	0		0	0	0	0	0		0	0	0	0	0	0	0		0	0	0	2	0		0	0	2	0	0	0	0	0		0	0	0	0	0		0	0	0	0	0	0
0	0	0	0	0		0	0	0	0	0		0	0	0	0	0	0	0		0	0	0	2	0		0	0	2	0	0	0	0	0		0	0	0	0	0		0	0	0	0	0	0
0	0	0	0	0		0	0	0	0	0		0	0	0	0	0	0	0		0	0	0	2	0		0	0	2	0	0	0	0	0		0	0	0	0	0		0	0	0	0	0	0
0	0	0	0	0		0	0	0	0	0		0	0	0	0	0	0	0		0	0	0	2	0		0	0	2	0	0	0	0	0		0	0	0	0	0		0	0	0	0	0	0
0	0	0	0	0		0	0	0	0	0		0	0	0	0	0	0	0		0	0	0	2	0		0	0	2	0	0	0	0	0		0	0	0	0	0		0	0	0	0	0	0
0	0	0	0	0		0	0	0	0	0		0	0	0	0	0	0	0		0	0	0	2	0		0	0	2	0	0	0	0	0		0	0	0	0	0		0	0	0	0	0	0
0	0	0	0	0		0	0	0	0	0		0	0	0	0	0	0	0		0	0	0	2	0		0	0	2	0	0	0	0	0		0	0	0	0	0		0	0	0	0	0	0
0	0	0	0	0		0	0	0	0	0		0	0	0	0	0	0	0		0	0	0	2	0		0	0	2	0	0	0	0	0		0	0	0	0	0		0	0	0	0	0	0
0	0	0	0	0		0	0	0	0	0		0	0	0	0	0	0	0		0	0	0	2	0		0	0	2	0	0	0	0	0		0	0	0	0	0		0	0	0	0	0	0
0	0	0	0	0		0	0	0	0	0		0	0	0	0	0	0	0		0	0	0	2	0		0	0	2	0	0	0	0	0		0	0	0	0	0		0	0	0	0	0	0
0	0	0	0	0		0	0	0	0	0		0	0	0	0	0	0	0		0	0	0	0	0		0	0	2	0	0	0	0	0		0	0	0	0	0		0	0	0	0	0	0
0	0	0	0	0		0	0	0	0	0		0	0	0	0	0	0	0		0	0	0	0	0		0	0	2	0	0	0	0	0		0	0	0	0	0		0	0	0	0	0	0
0	0	0	0	0		0	0	0	0	0		0	0	0	0	0	0	0		0	0	0	0	0		0	0	2	0	0	0	0	0		0	0	0	0	0		0	0	0	0	0	0
0	0	0	0	0		0	0	0	0	0		0	0	0	0	0	0	0		0	0	0	0	0		0	0	2	0	0	0	0	0		0	0	0	0	0		0	0	0	0	0	0
0	0	0	0	0		0	0	0	0	0		0	0	0	0	0	0	0		0	0	0	0	0		0	0	2	0	0	0	0	0		0	0	0	0	0		0	0	0	0	0	0
0	0	0	0	0		0	0	0	0	0		0	0	0	0	0	0	0		0	0	0	0	0		0	0	2	0	0	0	0	0		0	0	0	0	0		0	0	0	0	0	0
0	0	0	0	0		0	0	0	0	0		0	0	0	0	0	0	0		0	0	0	0	0		0	0	2	0	0	0	0	0		0	0	0	0	0		0	0	0	0	0	0
0	0	0	0	0		0	0	0	0	0		0	0	0	0	0	0	0		0	0	0	0	0		0	0	2	0	0	0	0	0		0	0	0	0	0		0	0	0	0	0	0
0	0	0	0	0		0	0	0	0	0		0	0	0	0	0	0	0		0	0	0	0	0		0	0	2	0	0	0	0	0		0	0	0	0	0		0	0	0	0	0	0
0	0	0	0	0		0	0	0	0	0		0	0	0	0	0	0	0		0	0	0	0	0		0	0	2	0	0	0	0	0		0	0	0	0	0		0	0	0	0	0	0
0	0	0	0	0		0	0	0	0	0		0	0	0	0	0	0	0		0	0	0	0	0		0	0	2	0	0	0	0	0		0	0	0	0	0		0	0	0	0	0	0
0	0	0	0	0		0	0	0	0	0		0	0	0	0	0	0	0		0	0	0	0	0		0	0	2	0	0	0	0	0		0	0	0	0	0		0	0	0	0	0	0
0	0	0	0	0		0	0	0	0	0		0	0	0	0	0	0	0		0	0	0	0	0		0	0	2	0	0	0	0	0		0	0	0	0	0		0	0	0	0	0	0
0	0	0	0	0		0	0	0	0	0		0	0	0	0	0	0	0		0	0	0	0	0		0	0	2	0	0	0	0	0		0	0	0	0	0		0	0	0	0	0	0
0	0	0	0	0		0	0	0	0	0		0	0	0	0	0	0	0		0	0	0	0	0		0	0	2	0	0	0	0	0		0	0	0	0	0		0	0	0	0	0	0
0	0	0	0	0		0	0	0	0	0		0	0	0	0	0	0	0		0	0	0	0	0		0	0	2	0	0	0	0	0		0	0	0	0	0		0	0	0	0	0	0
0	0	0	0	0		0	0	0	0	0		0	0	0	0	0	0	0		0	0	0	0	0		0	0	2	0	0	0	0	0		0	0	0	0	0		0	0	0	0	0	0
0	0	0	0	0		0	0	0	0	0		0	0	0	0	0	0	0		0	0	0	0	0		0	0	2	0	0	0	0	0		0	0	0	0	0		0	0	0	0	0	0
0	0	0	0	0		0	0	0	0	0		0	0	0	0	0	0	0		0	0	0	0	0		0	0	2	0	0	0	0	0		0	0	0	0	0		0	0	0	0	0	0
0	0	0	0	0		0	0	0	0	0		0	0	0	0	0	0	0		0	0	0	0	0		0	0	2	0	0	0	0	0		0	0	0	0	0		0	0	0	0	0	0
0	0	0	0	0		0	0	0	0	0		0	0	0	0	0	0	0		0	0	0	0	0		0	0	2	0	0	0	0	0		0	0	0	0	0		0	0	0	0	0	0
0	0	0	0	0		0	0	0	0	0		0	0	0	0	0	0	0		0	0	0	0	0		0	0	2	0	0	0	0	0		0	0	0	0	0		0	0	0	0	0	0
0	0	0	0	0		0	0	0	0	0		0	0	0	0	0	0	0		0	0	0	0	0		0	0	2	0	0	0	0	0		0	0	0	0	0		0	0	0	0	0	0
0	0	0	0	0		0	0	0	0	0		0	0	0	0	0	0	0		0	0	0	0	0		0	0	2	0	0	0	0	0		0	0	0	0	0		0	0	0	0	0	0
0	0	0	0	0		0	0	0	0	0		0	0	0	0	0	0	0		0	0	0	0	0		0	0	2	0	0	0	0	0		0	0	0	0	0		0	0	0	0	0	0
0	0	0	0	0		0	0	0	0	0		0	0	0	0	0	0	0		0	0	0	0	0		0	0	2	0	0	0	0	0		0	0	0	0	0		0	0	0	0	0	0
0	0	0	0	0		0	0	0	0	0		0	0	0	0	0	0	0		0	0	0	0	0		0	0	0	0	0	0	0	0		0	0	0	0	0		0	0	0	0	0	0
0	0	0	0	0		0	0	0	0	0		0	0	0	0	0	0	0		0	0	0	0	0		0	0	0	0	0	0	0	0		0	0	0	0	0		0	0	0	0	0	0
0	0	0	0	0		0	0	0	0	0		0	0	0	0	0	0	0		0	0	0	0	0		0	0	0	0	0	0	0	0		0	0	0	0	0		0	0	0	0	0	0
0	0	0	0	0		0	0	0	0	0		0	0	0	0	0	0	0		0	0	0	0	0		0	0	0	0	0	0	0	0		0	0	0	0	0		0	0	0	0	0	0
0	0	0	0	0		0	0	0	0	0		0	0	0	0	0	0	0		0	0	0	0	0		0	0	0	0	0	0	0	0		0	0	0	0	0		0	0	0	0	0	0
0	0	0	0	0		0	0	0	0	0		0	0	0	0	0	0	0		0	0	0	0	0		0	0	0	0	0	0	0	0		0	0	0	0	0		0	0	0	0	0	0
0	0	0	0	0		0	0	0	0	0		0	0	0	0	0	0	0		0	0	0	0	0		0	0	0	0	0	0	0	0		0	0	0	0	0		0	0	0	0	0	0
0	0	0	0	0		0	0	0	0	0		0	0	0	0	0	0	0		0	0	0	0	0		0	0	0	0	0	0	0	0		0	0	0	0	0		0	0	0	0	0	0
0	0	0	0	0		0	0	0	0	0		0	0	0	0	0	0	0		0	0	0	0	0		0	0	0	0	0	0	0	0		0	0	0	0	0		0	0	0	0	0	0
0	0	0	0	0		0	0	0	0	0		0	0	0	0	0	0	0		0	0	0	0	0		0	0	0	0	0	0	0	0		0	0	0	0	0		0	0	0	0	0	0
0	0	0	0	0		0	0	0	0	0		0	0	0	0	0	0	0		0	0	0	0	0		0	0	0	0	0	0	0	0		0	0	0	0	0		0	0	0	0	0	0
0	0	0	0	0		0	0	0	0	0		0	0	0	0	0	0	0		0	0	0	0	0		0	0	0	0	0	0	0	0		0	0	0	0	0		0	0	0	0	0	0
0	0	0	0	0		0	0	0	0	0		0	0	0	0	0	0	0		0	0	0	0	0		0	0	0	0	0	0	0	0		0	0	0	0	0		0	0	0	0	0	0
0	0	0	0	0		0	0	0	0	0		0	0	0	0	0	0	0		0	0	0	0	0		0	0	0	0	0	0	0	0		0	0	0	0	0		0	0	0	0	0	0
0	0	0	0	0		0	0	0	0	0		0	0	0	0	0	0	0		0	0	0	0	0		0	0	0	0	0	0	0	0		0	0	0	0	0		0	0	0	0	0	0
0	0	0	0	0		0	0	0	0	0		0	0	0	0	0	0	0		0	0	0	0	0		0	0	0	0	0	0	0	0		0	0	0	0	0		0	0	0	0	0	0
0	0	0	0	0		0	0	0	0	0		0	0	0	0	0	0	0		0	0	0	0	0		0	0	0	0	0	0	0	0		0	0	0	0	0		0	0	0	0	0	0
0	0	0	0	0		0	0	0	0	0		0	0	0	0	0	0	0		0	0	0	0	0		0	0	0	0	0	0	0	0		0	0	0	0	0		0	0	0	0	0	0
0	0	0	0	0		0	0	0	0	0		0	0	0	0	0	0	0		0	0	0	0	0		0	0	0	0	0	0	0	0		0	0	0	0	0		0	0	0	0	0	0
0	0	0	0	0		0	0	0	0	0		0	0	0	0	0	0	0		0	0	0	0	0		0	0	0	0	0	0	0	0		0	0	0	0	0		0	0	0	0	0	0
0	0	0	0	0		0	0	0	0	0		0	0	0	0	0	0	0		0	0	0	0	0		0	0	0	0	0	0	0	0		0	0	0	0	0		0	0	0	0	0	0
0	0	0	0	0		0	0	0	0	0		0	0	0	0	0	0	0		0	0	0	0	0		0	0	0	0	0	0	0	0		0	0	0	0	0		0	0	0	0	0	0
0	0	0	0	0		0	0	0	0	0		0	0	0	0	0	0	0		0	0	0	0	0		0	0	0	0	0	0	0	0		0	0	0	0	0		0	0	0	0	0	0
0	0	0	0	0		0	0	0	0	0		0	0	0	0	0	0	0		0	0	0	0	0		0	0	0	0	0	0	0	0		0	0	0	0	0		0	0	0	0	0	0
0	0	0	0	0		0	0	0	0	0		0	0	0	0	0	0	0		0	0	0	0	0		0	0	0	0	0	0	0	0		0	0	0	0	0		0	0	0	0	0	0
0	0	0	0	0		0	0	0	0	0		0	0	0	0	0	0	0		0	0	0	0	0		0	0	0	0	0	0	0	0		0	0	0	0	0		0	0	0	0	0	0
0	0	0	0	0		0	0	0	0	0		0	0	0	0	0	0	0		0	0	0	0	0		0	0	0	0	0	0	0	0		0	0	0	0	0		0	0	0	0	0	0
0	0	0	0	0		0	0	0	0	0		0	0	0	0	0	0	0		0	0	0	0	0		0	0	0	0	0	0	0	0		0	0	0	0	0		0	0	0	0	0	0
0	0	0	0	0		0	0	0	0	0		0	0	0	0	0	0	0		0	0	0	0	0		0	0	0		0	0	0	0		0	0	0	0	0		0	0	0	0	0	0
0	0	0	0	0		0	0	0	0	0		0	0	0	0	0	0	0		0	0	0	0	0		0	0	0		0	0	0	0		0	0	0	0	0		0	0	0	0	0	0
0	0	0	0	0		0	0	0	0	0		0	0	0	0	0	0	0		0	0	0	0	0		0	0	0		0	0	0	0		0	0	0	0	0		0	0	0	0	0	0
0	0	0	0	0		0	0	0	0	0		0	0	0	0	0	0	0		0	0	0	0	0		0	0	0		0	0	0	0		0	0	0	0	0		0	0	0	0	0	0
0	0	0	0	0		0	0	0	0	0		0	0	0	0	0	0	0		0	0	0	0	0		0	0	0		0	0	0	0		0	0	0	0	0		0	0	0	0	0	0
0	0	0	0	0		0	0	0	0	0		0	0	0	0	0	0	0		0	0	0	0	0		0	0	0		0	0	0	0		0	0	0	0	0		0	0	0	0	0	0
0	0	0	0	0		0	0	0	0	0		0	0	0	0	0	0	0		0	0	0	0	0		0	0	0		0	0	0	0		0	0	0	0	0		0	0	0	0	0	0
0	0	0	0	0		0	0	0	0	0		0	0	0	0	0	0	0		0	0	0	0	0		0	0	0		0	0	0	0		0	0	0	0	0		0	0	0	0	0	0
0	0	0	0	0		0	0	0	0	0		0	0	0	0	0	0	0		0	0	0	0	0		0	0	0		0	0	0	0		0	0	0	0	0		0	0	0	0	0	0
0	0	0	0	0		0	0	0	0	0		0	0	0	0	0	0	0		0	0	0	0	0		0	0	0		0	0	0	0		0	0	0	0	0		0	0	0	0	0	0
0	0	0	0	0		0	0	0	0	0		0	0	0	0	0	0	0		0	0	0	0	0		0	0	0		0	0	0	0		0	0	0	0	0		0	0	0	0	0	0
0	0	0	0	0		0	0	0	0	0		0	0	0	0	0	0	0		0	0	0	0	0		0	0	0		0	0	0	0		0	0	0	0	0		0	0	0	0	0	0
0	0	0	0	0		0	0	0	0	0		0	0	0	0	0	0	0		0	0	0	0	0		0	0	0		0	0	0	0		0	0	0	0	0		0	0	0	0	0	0
0	0	0	0	0		0	0	0	0	0		0	0	0	0	0	0	0		0	0	0	0	0		0	0	0		0	0	0	0		0	0	0	0	0		0	0	0	0	0	0
0	0	0	0	0		0	0	0	0	0		0	0	0	0	0	0	0		0	0	0	0	0		0	0	0		0	0	0	0		0	0	0	0	0		0	0	0	0	0	0
0	0	0	0	0		0	0	0	0	0		0	0	0	0	0	0	0		0	0	0	0	0		0	0	0		0	0	0	0		0	0	0	0	0		0	0	0	0	0	0
0	0	0	0	0		0	0	0	0	0		0	0	0	0	0	0	0		0	0	0	0	0		0	0	0		0	0	0	0		0	0	0	0	0		0	0	0	0	0	0
0	0	0	0	0		0	0	0	0	0		0	0	0	0	0	0	0		0	0	0	0	0		0	0	0		0	0	0	0		0	0	0	0	0		0	0	0	0	0	0
0	0	0	0	0		0	0	0	0	0		0	0	0	0	0	0	0		0	0	0	0	0		0	0	0		0	0	0	0		0	0	0	0	0		0	0	0	0	0	0
0	0	0	0	0		0	0	0	0	0		0	0	0	0	0	0	0		0	0	0	0	0		0	0	0		0	0	0	0		0	0	0	0	0		0	0	0	0	0	0
0	0	0	0	0		0	0	0	0	0		0	0	0	0	0	0	0		0	0	0	0	0		0	0	0		0	0	0	0		0	0	0	0	0		0	0	0	0	0	0
0	0	0	0	0		0	0	0	0	0		0	0	0	0	0	0	0		0	0	0	0	0		0	0	0		0	0	0	0		0	0	0	0	0		0	0	0	0	0	0
0	0	0	0	0		0	0	0	0	0		0	0	0	0	0	0	0		0	0	0	0	0		0	0	0		0	0	0	0		0	0	0	0	0		0	0	0	0	0	0
0	0	0	0	0		0	0	0	0	0		0	0	0	0	0	0	0		0	0	0	0	0		0	0	0		0	0	0	0		0	0	0	0	0		0	0	0	0	0	0
0	0	0	0	0		0	0	0	0	0		0	0	0	0	0	0	0		0	0	0	0	0		0	0	0		0	0	0	0		0	0	0	0	0		0	0	0	0	0	0
0	0	0	0	0		0	0	0	0	0		0	0	0	0	0	0	0		0	0	0	0	0		0	0	0		0	0	0	0		0	0	0	0	0		0	0	0	0	0	0
0	0	0	0	0		0	0	0	0	0		0	0	0	0	0	0	0		0	0	0	0	0		0	0	0		0	0	0	0		0	0	0	0	0		0	0	0	0	0	0
0	0	0	0	0		0	0	0	0	0		0	0	0	0	0	0	0		0	0	0	0	0		0	0	0		0	0	0	0		0	0	0	0	0		0	0	0	0	0	0
0	0	0	0	0		0	0	0	0	0		0	0	0	0	0	0	0		0	0	0	0	0		0	0	0		0	0	0	0		0	0	0	0	0		0	0	0	0	0	0
0	0	0	0	0		0	0	0	0	0		0	0	0	0	0	0	0		0	0	0	0	0		0	0	0		0	0	0	0		0	0	0	0	0		0	0	0	0	0	0
0	0	0	0	0		0	0	0	0	0		0	0	0	0	0	0	0		0	0	0	0	0		0	0	0		0	0	0	0		0	0	0	0	0		0	0	0	0	0	0
0	0	0	0	0		0	0	0	0	0		0	0	0	0	0	0	0		0	0	0	0	0		0	0	0		0	0	0	0		0	0	0	0	0		0	0	0	0	0	0
0	0	0	0	0		0	0	0	0	0		0	0	0	0	0	0	0		0	0	0	0	0		0	0	0		0	0	0	0		0	0	0	0	0		0	0	0	0	0	0
0	0	0	0	0		0	0	0	0	0		0	0	0	0	0	0	0		0	0	0	0	0		0	0	0		0	0	0	0		0	0	0	0	0		0	0	0	0	0	0
0	0	0	0	0		0	0	0	0	0		0	0	0	0	0	0	0		0	0	0	0	0		0	0	0		0	0	0	0		0	0	0	0	0		0	0	0	0	0	0
0	0	0	0	0		0	0	0	0	0		0	0	0	0	0	0	0		0	0	0	0	0		0	0	0		0	0	0	0		0	0	0	0	0		0	0	0	0	0	0
0	0	0	0	0		0	0	0	0	0		0	0	0	0	0	0	0		0	0	0	0	0		0	0	0		0	0	0	0		0	0	0	0	0		0	0	0	0	0	0
0	0	0	0	0		0	0	0	0	0		0	0	0	0	0	0	0		0	0	0	0	0		0	0	0		0	0	0	0		0	0	0	0	0		0	0	0	0	0	0
0	0	0	0	0		0	0	0	0	0		0	0	0	0	0	0	0		0	0	0	0	0		0	0	0		0	0	0	0		0	0	0	0	0		0	0	0	0	0	0
0	0	0	0	0		0	0	0	0	0		0	0	0	0	0	0	0		0	0	0	0	0		0	0	0		0	0	0	0		0	0	0	0	0		0	0	0	0	0	0
0	0	0	0	0		0	0	0	0	0		0	0	0	0	0	0	0		0	0	0	0	0		0	0	0		0	0	0	0		0	0	0	0	0		0	0	0	0	0	0
0	0	0	0	0		0	0	0	0	0		0	0	0	0	0	0	0		0	0	0	0	0		0	0	0		0	0	0	0		0	0	0	0	0		0	0	0	0	0	0
0	0	0	0	0		0	0	0	0	0		0	0	0	0	0	0	0		0	0	0	0	0		0	0	0		0	0	0	0		0	0	0	0	0		0	0	0	0	0	0
0	0	0	0	0		0	0	0	0	0		0	0	0	0	0	0	0		0	0	0	0	0		0	0	0		0	0	0	0		0	0	0	0	0		0	0	0	0	0	0
0	0	0	0	0		0	0	0	0	0		0	0	0	0	0	0	0		0	0	0	0	0		0	0	0		0	0	0	0		0	0	0	0	0		0	0	0	0	0	0
0	0	0	0	0		0	0	0	0	0		0	0	0	0	0	0	0		0	0	0	0	0		0	0	0		0	0	0	0		0	0	0	0	0		0	0	0	0	0	0
0	0	0	0	0		0	0	0	0	0		0	0	0	0	0	0	0		0	0	0	0	0		0	0	0		0	0	0	0		0	0	0	0	0		0	0	0	0	0	0
0	0	0	0	0		0	0	0	0	0		0	0	0	0	0	0	0		0	0	0	0	0		0	0	0		0	0	0	0		0	0	0	0	0		0	0	0	0	0	0
0	0	0	0	0		0	0	0	0	0		0	0	0	0	0	0	0		0	0	0	0	0		0	0	0		0	0	0	0		0	0	0	0	0		0	0	0	0	0	0
0	0	0	0	0		0	0	0	0	0		0	0	0	0	0	0	0		0	0	0	0	0		0	0	0		0	0	0	0		0	0	0	0	0		0	0	0	0	0	0
0	0	0	0	0		0	0	0	0	0		0	0	0	0	0	0	0		0	0	0	0	0		0	0	0		0	0	0	0		0	0	0	0	0		0	0	0	0	0	0
0	0	0	0	0		0	0	0	0	0		0	0	0	0	0	0	0		0	0	0	0	0		0	0	0		0	0	0	0		0	0	0	0	0		0	0	0	0	0	0
0	0	0	0	0		0	0	0	0	0		0	0	0	0	0	0	0		0	0	0	0	0		0	0	0		0	0	0	0		0	0	0	0	0		0	0	0	0	0	0
0	0	0	0	0		0	0	0	0	0		0	0	0	0	0	0	0		0	0	0	0	0		0	0	0		0	0	0	0		0	0	0	0	0		0	0	0	0	0	0
0	0	0	0	0		0	0	0	0	0		0	0	0	0	0	0	0		0	0	0	0	0		0	0	0		0	0	0	0		0	0	0	0	0		0	0	0	0	0	0
0	0	0	0	0		0	0	0	0	0		0	0	0	0	0	0	0		0	0	0	0	0		0	0	0		0	0	0	0		0	0	0	0	0		0	0	0	0	0	0
0	0	0	0	0		0	0	0	0	0		0	0	0	0	0	0	0		0	0	0	0	0		0	0	0		0	0	0	0		0	0	0	0	0		0	0	0	0	0	0
0	0	0	0	0		0	0	0	0	0		0	0	0	0	0	0	0		0	0	0	0	0		0	0	0		0	0	0	0		0	0	0	0	0		0	0	0	0	0	0
0	0	0	0	0		0	0	0	0	0		0	0	0	0	0	0	0		0	0	0	0	0		0	0	0		0	0	0	0		0	0	0	0	0		0	0	0	0	0	0
0	0	0	0	0		0	0	0	0	0		0	0	0	0	0	0	0		0	0	0	0	0		0	0	0		0	0	0	0		0	0	0	0	0		0	0	0	0	0	0
0	0	0	0	0		0	0	0	0	0		0	0	0	0	0	0	0		0	0	0	0	0		0	0	0		0	0	0	0		0	0	0	0	0		0	0	0	0	0	0
0	0	0	0	0		0	0	0	0	0		0	0	0	0	0	0	0		0	0	0	0	0		0	0	0		0	0	0	0		0	0	0	0	0		0	0	0	0	0	0
0	0	0	0	0		0	0	0	0	0		0	0	0	0	0	0	0		0	0	0	0	0		0	0	0		0	0	0	0		0	0	0	0	0		0	0	0	0	0	0
0	0	0	0	0		0	0	0	0	0		0	0	0	0	0	0	0		0	0	0	0	0		0	0	0		0	0	0	0		0	0	0	0	0		0	0	0	0	0	0
0	0	0	0	0		0	0	0	0	0		0	0	0	0	0	0	0		0	0	0	0	0		0	0	0		0	0	0	0		0	0	0	0	0		0	0	0	0	0	0
0	0	0	0	0		0	0	0	0	0		0	0	0	0	0	0	0		0	0	0	0	0		0	0	0		0	0	0	0		0	0	0	0	0		0	0	0	0	0	0
0	0	0	0	0		0	0	0	0	0		0	0	0	0	0	0	0		0		0	0	0		0	0	0		0	0	0	0		0	0	0	0	0		0	0	0	0	0	0
0	0	0	0	0		0	0	0	0	0		0	0	0	0	0	0	0		0		0	0	0		0	0	0		0	0	0	0		0	0	0	0	0		0	0	0	0	0	0
0	0	0	0	0		0	0	0	0	0		0	0	0	0	0	0	0		0		0	0	0		0	0	0		0	0	0	0		0	0	0	0	0		0	0	0	0	0	0
0	0	0	0	0		0	0	0	0	0		0	0	0	0	0	0	0		0		0	0	0		0	0	0		0	0	0	0		0	0	0	0	0		0	0	0	0	0	0
0	0	0	0	0		0	0	0	0	0		0	0	0	0	0	0	0		0		0	0	0		0	0	0		0	0	0	0		0	0	0	0	0		0	0	0	0	0	0
0	0	0	0	0		0	0	0	0	0		0	0	0	0	0	0	0		0		0	0	0		0	0	0		0	0	0	0		0	0	0	0	0		0	0	0	0	0	0
0	0	0	0	0		0	0	0	0	0		0	0	0	0	0	0	0		0		0	0	0		0	0	0		0	0	0	0		0	0	0	0	0		0	0	0	0	0	0
0	0	0	0	0		0	0	0	0	0		0	0	0	0	0	0	0		0		0	0	0		0	0	0		0	0	0	0		0	0	0	0	0		0	0	0	0	0	0
0	0	0	0	0		0	0	0	0	0		0	0	0	0	0	0	0		0		0	0	0		0	0	0		0	0	0	0		0	0	0	0	0		0	0	0	0	0	0
0	0	0	0	0		0	0	0	0	0		0	0	0	0	0	0	0		0		0	0	0		0	0	0		0	0	0	0		0	0	0	0	0		0	0	0	0	0	0
0	0	0	0	0		0	0	0	0	0		0	0	0	0	0	0	0		0		0	0	0		0	0	0		0	0	0	0		0	0	0	0	0		0	0	0	0	0	0
0	0	0	0	0		0	0	0	0	0		0	0	0	0	0	0	0		0		0	0	0		0	0	0		0	0	0	0		0	0	0	0	0		0	0	0	0	0	0
0	0	0	0	0		0	0	0	0	0		0	0	0	0	0	0	0		0		0	0	0		0	0	0		0	0	0	0		0	0	0	0	0		0	0	0	0	0	0
0	0	0	0	0		0	0	0	0	0		0	0	0	0	0	0	0		0		0	0	0		0	0	0		0	0	0	0		0	0	0	0	0		0	0	0	0	0	0
0	0	0	0	0		0	0	0	0	0		0	0	0	0	0	0	0		0		0	0	0		0	0	0		0	0	0	0		0	0	0	0	0		0	0	0	0	0	0
0	0	0	0	0		0	0	0	0	0		0	0	0	0	0	0	0		0		0	0	0		0	0	0		0	0	0	0		0	0	0	0	0		0	0	0	0	0	0
0	0	0	0	0		0	0	0	0	0		0	0	0	0	0	0	0		0		0	0	0		0	0	0		0	0	0	0		0	0	0	0	0		0	0	0	0	0	0
0	0	0	0	0		0	0	0	0	0		0	0	0	0	0	0	0		0		0	0	0		0	0	0		0	0	0	0		0	0	0	0	0		0	0	0	0	0	0
0	0	0	0	0		0	0	0	0	0		0	0	0	0	0	0	0		0		0	0	0		0	0	0		0	0	0	0		0	0	0	0	0		0	0	0	0	0	0
0	0	0	0	0		0	0	0	0	0		0	0	0	0	0	0	0		0		0	0	0		0	0	0		0	0	0	0		0	0	0	0	0		0	0	0	0	0	0
0	0	0	0	0		0	0	0	0	0		0	0	0	0	0	0	0		0		0	0	0		0	0	0		0	0	0	0		0	0	0	0	0		0	0	0	0	0	0
0	0	0	0	0		0	0	0	0	0		0	0	0	0	0	0	0		0		0	0	0		0	0	0		0	0	0	0		0	0	0	0	0		0	0	0	0	0	0
0	0	0	0	0		0	0	0	0	0		0	0	0	0	0	0	0		0		0	0	0		0	0	0		0	0	0	0		0	0	0	0	0		0	0	0	0	0	0
0	0	0	0	0		0	0	0	0	0		0	0	0	0	0	0	0		0		0	0	0		0	0	0		0	0	0	0		0	0	0	0	0		0	0	0	0	0	0
0	0	0	0	0		0	0	0	0	0		0	0	0		0	0	0		0		0	0	0		0	0	0		0	0	0	0		0	0	0	0	0		0	0	0	0	0	0
0	0	0	0	0		0	0	0	0	0		0	0	0		0	0	0		0		0	0	0		0	0	0		0	0	0	0		0	0	0	0	0		0	0	0	0	0	0
0	0	0	0	0		0	0	0	0	0		0	0	0		0	0	0		0		0	0	0		0	0	0		0	0	0	0		0	0	0	0	0		0	0	0	0	0	0
0	0	0	0	0		0	0	0	0	0		0	0	0		0	0	0		0		0	0	0		0	0	0		0	0	0	0		0	0	0	0	0		0	0	0	0	0	0
0	0	0	0	0		0	0	0	0	0		0	0	0		0	0	0		0		0	0	0		0	0	0		0	0	0	0		0	0	0	0	0		0	0	0	0	0	0
0	0	0	0	0		0	0	0	0	0		0	0	0		0	0	0		0		0	0	0		0	0	0		0	0	0	0		0	0	0	0	0		0	0	0	0	0	0
0	0	0	0	0		0	0	0	0	0		0	0	0		0	0	0		0		0	0	0		0	0	0		0	0	0	0		0	0	0	0	0		0	0	0	0	0	0
0	0	0	0	0		0	0	0	0	0		0	0	0		0	0	0		0		0	0	0		0	0	0		0	0	0	0		0	0	0	0	0		0	0	0	0	0	0
0	0	0	0	0		0	0	0	0	0		0	0	0		0	0	0		0		0	0	0		0	0	0		0	0		0		0	0	0	0	0		0	0	0	0	0	0
0	0	0	0	0		0	0	0	0	0		0	0	0		0	0	0		0		0	0	0		0	0	0		0	0		0		0	0	0	0	0		0	0	0	0	0	0
0	0	0	0	0		0	0	0	0	0		0	0	0		0	0	0		0		0	0	0		0	0	0		0	0		0		0	0	0	0	0		0	0	0	0	0	0
0	0	0	0	0		0	0	0	0	0		0	0	0		0	0	0		0		0	0	0		0	0	0		0	0		0		0	0	0	0	0		0	0	0	0	0	0
0	0	0	0	0		0	0	0	0	0		0	0	0		0	0	0		0		0	0	0		0	0	0		0	0		0		0	0	0	0	0		0	0	0	0	0	0
0	0	0	0	0		0	0	0	0	0		0	0	0		0	0	0		0		0	0	0		0	0	0		0	0		0		0	0	0	0	0		0	0	0	0	0	0
0	0	0	0	0		0	0	0	0	0		0	0	0		0	0	0		0		0	0	0		0	0	0		0	0		0		0	0	0	0	0		0	0	0	0	0	0
0	0	0	0	0		0	0	0	0	0		0	0	0		0	0	0		0		0	0	0		0	0	0		0	0		0		0	0	0	0	0		0	0	0	0	0	0
0	0	0	0	0		0	0	0	0	0		0	0	0		0	0	0		0		0	0	0		0	0	0		0	0		0		0	0	0	0	0		0	0	0	0	0	0
0	0	0	0	0		0	0	0	0	0		0	0	0		0	0	0		0		0	0	0		0	0	0		0	0		0		0	0	0	0	0		0	0	0	0	0	0
0	0	0	0	0		0	0	0	0	0		0	0	0		0	0	0		0		0	0	0		0	0	0		0	0		0		0	0	0	0	0		0	0	0	0	0	0
0	0	0	0	0		0	0	0	0	0		0	0	0		0	0	0		0		0	0	0		0	0	0		0	0		0		0	0	0	0	0		0	0	0	0	0	0
0	0	0	0	0		0	0	0	0	0		0	0	0		0	0	0		0		0	0	0		0	0	0		0	0		0		0	0	0	0	0		0	0	0	0	0	0
0	0	0	0	0		0	0	0	0	0		0	0	0		0	0	0		0		0	0	0		0	0	0		0	0		0		0	0	0	0	0		0	0	0	0	0	0
0	0	0	0	0		0	0	0	0	0		0	0	0		0	0	0		0		0	0	0		0	0	0		0	0		0		0	0	0	0	0		0	0	0	0	0	0
0	0	0	0	0		0	0	0	0	0		0	0	0		0	0	0		0		0	0	0		0	0	0		0	0		0		0	0	0	0	0		0	0	0	0	0	0
0	0	0	0	0		0	0	0	0	0		0	0	0		0	0	0		0		0	0	0		0	0	0		0	0		0		0	0	0	0	0		0	0	0	0	0	0
0	0	0	0	0		0	0	0	0	0		0	0	0		0	0	0		0		0	0	0		0	0	0		0	0		0		0	0	0	0	0		0	0	0	0	0	0
0	0	0	0	0		0	0	0	0	0		0	0	0		0	0	0		0		0	0	0		0	0	0		0	0		0		0	0	0	0	0		0	0	0	0	0	0
0	0	0	0	0		0	0	0	0	0		0	0	0		0	0	0		0		0	0	0		0	0	0		0	0		0		0	0	0	0	0		0	0	0	0	0	0
0	0	0	0	0		0	0	0	0	0		0	0	0		0	0	0		0		0	0	0		0	0	0		0	0		0		0	0	0	0	0		0	0	0	0	0	0
0	0	0	0	0		0	0	0	0	0		0	0	0		0	0	0		0		0	0	0		0	0	0		0	0		0		0	0	0	0	0		0	0	0	0	0	0
0	0	0	0	0		0	0	0	0	0		0	0	0		0	0	0		0		0	0	0		0	0	0		0	0		0		0	0	0	0	0		0	0	0	0	0	0
0	0	0	0	0		0	0	0	0	0		0	0	0		0	0	0		0		0	0	0		0	0	0		0	0		0		0	0	0	0	0		0	0	0	0	0	0
0	0	0	0	0		0	0	0	0	0		0	0	0		0	0	0		0		0	0	0		0	0	0		0	0		0		0	0	0	0	0		0	0	0	0	0	0
0	0	0	0	0		0	0	0	0	0		0	0	0		0	0	0		0		0	0	0		0	0	0		0	0		0		0	0	0	0	0		0	0	0	0	0	0
0	0	0	0	0		0	0	0	0	0		0	0	0		0	0	0		0		0	0	0		0	0	0		0	0		0		0	0	0	0	0		0	0	0	0	0	0
0	0	0	0	0		0	0	0	0	0		0	0	0		0	0	0		0		0	0	0		0	0	0		0	0		0		0	0	0	0	0		0	0	0	0	0	0
0	0	0	0			0	0	0	0	0		0	0	0		0	0	0		0		0	0	0		0	0	0		0	0		0		0	0	0	0	0		0	0	0	0	0	0
0	0	0	0			0	0	0	0	0		0	0	0		0	0	0		0		0	0	0		0	0	0		0	0		0		0	0	0	0	0		0	0	0	0	0	0
0	0	0	0			0	0	0	0	0		0	0	0		0	0	0		0		0	0	0		0	0	0		0	0		0		0	0	0	0	0		0	0	0	0	0	0
0	0	0	0			0	0	0	0	0		0	0	0		0	0	0		0		0	0	0		0	0	0		0	0		0		0	0	0	0	0		0	0	0	0	0	0
0	0	0	0			0	0	0	0	0		0	0	0		0	0	0		0		0	0	0		0	0	0		0	0		0		0	0	0	0	0		0	0	0	0	0	0
0	0	0	0			0	0	0	0	0		0	0	0		0	0	0		0		0	0	0		0	0	0		0	0		0		0	0	0	0	0		0	0	0	0	0	0
0	0	0	0			0	0	0	0	0		0	0	0		0	0	0		0		0	0	0		0	0	0		0	0		0		0	0	0	0	0		0	0	0	0	0	0
0	0	0	0			0	0	0	0	0		0	0	0		0	0	0		0		0	0	0		0	0	0		0	0		0		0	0	0	0	0		0	0	0	0	0	0
0	0	0	0			0	0	0	0	0		0	0	0		0	0	0		0		0	0	0		0	0	0		0	0		0		0	0	0	0	0		0	0	0	0	0	0
0	0	0	0			0	0	0	0	0		0	0	0		0	0	0		0		0	0	0		0	0	0		0	0		0		0	0	0	0	0		0	0	0	0	0	0
0	0	0	0			0	0	0	0	0		0	0	0		0	0	0		0		0	0	0		0	0	0		0	0		0		0	0	0	0	0		0	0	0	0	0	0
0	0	0	0			0	0	0	0	0		0	0	0		0	0	0		0		0	0	0		0	0	0		0	0		0		0	0	0	0	0		0	0	0	0	0	0
0	0	0	0			0	0	0	0	0		0	0	0		0	0	0		0		0	0	0		0	0	0		0	0		0		0	0	0	0	0		0	0	0	0	0	0
0	0	0	0			0	0	0	0	0		0	0	0		0	0	0		0		0	0	0		0	0	0		0	0		0		0	0	0	0	0		0	0	0	0	0	0
0	0	0	0			0	0	0	0	0		0	0	0		0	0	0		0		0	0	0		0	0	0		0	0		0		0	0	0	0	0		0	0	0	0	0	0
0	0	0	0			0	0	0	0	0		0	0	0		0	0	0		0		0	0	0		0	0	0		0	0		0		0	0	0	0	0		0	0	0	0	0	0
0	0	0	0			0	0	0	0	0		0	0	0		0	0	0		0		0	0	0		0	0	0		0	0		0		0	0	0	0	0		0	0	0	0	0	0
0	0	0	0			0	0	0	0	0		0	0	0		0	0	0		0		0	0	0		0	0	0		0	0		0		0	0	0	0	0		0	0	0	0	0	0
0	0	0	0			0	0	0	0	0		0	0	0		0	0	0		0		0	0	0		0	0	0		0	0		0		0	0	0	0	0		0	0	0	0	0	0
0	0	0	0			0	0	0	0	0		0	0	0		0	0	0		0		0	0	0		0	0	0		0	0		0		0	0	0	0	0		0	0	0	0	0	0
0	0	0	0			0	0	0	0	0		0	0	0		0	0	0		0		0	0	0		0	0	0		0	0		0		0	0	0	0	0		0	0	0	0	0	0
0	0	0	0			0	0	0	0	0		0	0	0		0	0	0		0		0	0	0		0	0	0		0	0		0		0	0	0	0	0		0	0	0	0	0	0
0	0	0	0			0	0	0	0	0		0	0	0		0	0	0		0		0	0	0		0	0	0		0	0		0		0	0	0	0	0		0	0	0	0	0	0
0	0	0	0			0	0	0	0	0		0	0	0		0	0	0		0		0	0	0		0	0	0		0	0		0		0	0	0	0	0		0	0	0	0	0	0
0	0	0	0			0	0	0	0	0		0	0	0		0	0	0		0		0	0	0		0	0	0		0	0		0		0	0	0	0	0		0	0	0	0	0	0
0	0	0	0			0	0	0	0	0		0	0	0		0	0	0		0		0	0	0		0	0	0		0	0		0		0	0	0	0	0		0	0	0	0	0	0
0	0	0	0			0	0	0	0	0		0	0	0		0	0	0		0		0	0	0		0	0	0		0	0		0		0	0	0	0	0		0	0	0	0	0	0
0	0	0	0			0	0	0	0	0		0	0	0		0	0	0		0		0	0	0		0	0	0		0	0		0		0	0	0	0	0		0	0	0	0	0	0
0	0	0	0			0	0	0	0	0		0	0	0		0	0	0		0		0	0	0		0	0	0		0	0		0		0	0	0	0	0		0	0	0	0	0	0
0	0	0	0			0	0	0	0	0		0	0	0		0	0	0		0		0	0	0		0	0	0		0	0		0		0	0	0	0	0		0	0	0	0	0	0
0	0	0	0			0	0	0	0	0		0	0	0		0	0	0		0		0	0	0		0	0	0		0	0		0		0	0	0	0	0		0	0	0	0	0	0
0	0	0	0			0	0	0	0	0		0	0	0		0	0	0		0		0	0	0		0	0	0		0	0		0		0	0	0	0	0		0	0	0	0	0	0
0	0	0	0			0	0	0	0	0		0	0	0		0	0	0		0		0	0	0		0	0	0		0	0		0		0	0	0	0	0		0	0	0	0	0	0
0	0	0	0			0	0	0	0	0		0	0	0		0	0	0		0		0	0	0		0	0	0		0	0		0		0	0	0	0	0		0	0	0	0	0	0
0	0	0	0			0	0	0	0	0		0	0	0		0	0	0		0		0	0	0		0	0	0		0	0		0		0	0	0	0	0		0	0	0	0	0	0
0	0	0	0			0	0	0	0	0		0	0	0		0	0	0		0		0	0	0		0	0	0		0	0		0		0	0	0	0	0		0	0	0	0	0	0
0	0	0	0			0	0	0	0	0		0	0	0		0	0	0		0		0	0	0		0	0	0		0	0		0		0	0	0	0	0		0	0	0	0	0	0
0	0	0	0			0	0	0	0	0		0	0	0		0	0	0		0		0	0	0		0	0	0		0	0		0		0	0	0	0	0		0	0	0	0	0	0
0	0	0	0			0	0	0	0	0		0	0	0		0	0	0		0		0	0	0		0	0	0		0	0		0		0	0	0	0	0		0	0	0	0	0	0
0	0	0	0			0	0	0	0	0		0	0	0		0	0	0		0		0	0	0		0	0	0		0	0		0		0	0	0	0	0		0	0	0	0	0	0
0	0	0	0			0	0	0	0	0		0	0	0		0	0	0		0		0	0	0		0	0	0		0	0		0		0	0	0	0	0		0	0	0	0	0	0
0	0	0	0			0	0	0	0	0		0	0	0		0	0	0		0		0	0	0		0	0	0		0	0		0		0	0	0	0	0		0	0	0	0	0	0
0	0	0	0			0	0	0	0	0		0	0	0		0	0	0		0		0	0	0		0	0	0		0	0		0		0	0	0	0	0		0	0	0	0	0	0
0	0	0	0			0	0	0	0	0		0	0	0		0	0	0		0		0	0	0		0	0	0		0	0		0		0	0	0	0	0		0	0	0	0	0	0
0	0	0	0			0	0	0	0	0		0	0	0		0	0	0		0		0	0	0		0	0	0		0	0		0		0	0	0	0	0		0	0	0	0	0	0
0	0	0	0			0	0	0	0	0		0	0	0		0	0	0		0		0	0	0		0	0	0		0	0		0		0	0	0	0	0		0	0	0	0	0	0
0	0	0	0			0	0	0	0	0		0	0	0		0	0	0		0		0	0	0		0	0	0		0	0		0		0	0	0	0	0		0	0	0	0	0	0
0	0	0	0			0	0	0	0	0		0	0	0		0	0	0		0		0	0	0		0	0	0		0	0		0		0	0	0	0	0		0	0	0	0	0	0
0	0	0	0			0	0	0	0	0		0	0	0		0	0	0		0		0	0	0		0	0	0		0	0		0		0	0	0	0	0		0	0	0	0	0	0
0	0	0	0			0	0	0	0	0		0	0	0		0	0	0		0		0	0	0		0	0	0		0	0		0		0	0	0	0	0		0	0	0	0	0	0
0	0	0	0			0	0	0	0	0		0	0	0		0	0	0		0		0	0	0		0	0	0		0	0		0		0	0	0	0	0		0	0	0	0	0	0
0	0	0	0			0	0	0	0	0		0	0	0		0	0	0		0		0	0	0		0	0	0		0	0		0		0	0	0	0	0		0	0	0	0	0	0
0	0	0	0			0	0	0	0	0		0	0	0		0	0	0		0		0	0	0		0	0	0		0	0		0		0	0	0	0	0		0	0	0	0	0	0
0	0	0	0			0	0	0	0	0		0	0	0		0	0	0		0		0	0	0		0	0	0		0	0		0		0	0	0	0	0		0	0	0	0	0	0
0	0	0	0			0	0	0	0	0		0	0	0		0	0	0		0		0	0	0		0	0	0		0	0		0		0	0	0	0	0		0	0	0	0	0	0
0	0	0	0			0	0	0	0	0		0	0	0		0	0	0		0		0	0	0		0	0	0		0	0		0		0	0	0	0	0		0	0	0	0	0	0
0	0	0	0			0	0	0	0	0		0	0	0		0	0	0		0		0	0	0		0	0	0		0	0		0		0	0	0	0	0		0	0	0	0	0	0
0	0	0	0			0	0	0	0	0		0	0	0		0	0	0		0		0	0	0		0	0	0		0	0		0		0	0	0	0	0		0	0	0	0	0	0
0	0	0	0			0	0	0	0	0		0	0	0		0	0	0		0		0	0	0		0	0	0		0	0		0		0	0	0	0	0		0	0	0	0	0	0
0	0	0	0			0	0	0	0	0		0	0	0		0	0	0		0		0	0	0		0	0	0		0	0		0		0	0	0	0	0		0	0	0	0	0	0
0	0	0	0			0	0	0	0	0		0	0	0		0	0	0		0		0	0	0		0	0	0		0	0		0		0	0	0	0	0		0	0	0	0	0	0
0	0	0	0			0	0	0	0	0		0	0	0		0	0	0		0		0	0	0		0	0	0		0	0		0		0	0	0	0	0		0	0	0	0	0	0
0	0	0	0			0	0	0	0	0		0	0	0		0	0	0		0		0	0	0		0	0	0		0	0		0		0	0	0	0	0		0	0	0	0	0	0
0	0	0	0			0	0	0	0	0		0	0	0		0	0	0		0		0	0	0		0	0	0		0	0		0		0	0	0	0	0		0	0	0	0	0	0
0	0	0	0			0	0	0	0	0		0	0	0		0	0	0		0		0	0	0		0	0	0		0	0		0		0	0	0	0	0		0	0	0	0	0	0
0	0	0	0			0	0	0	0	0		0	0	0		0	0	0		0		0	0	0		0	0	0		0	0		0		0	0	0	0	0		0	0	0	0	0	0
0	0	0	0			0	0	0	0	0		0	0	0		0	0	0		0		0	0	0		0	0	0		0	0		0		0	0	0	0	0		0	0	0	0	0	0
0	0	0	0			0	0	0	0	0		0	0	0		0	0	0		0		0	0	0		0	0	0		0	0		0		0	0	0	0	0		0	0	0	0	0	0
0	0	0	0			0	0	0	0	0		0	0	0		0	0	0		0		0	0	0		0	0	0		0	0		0		0	0	0	0	0		0	0	0	0	0	0
0	0	0	0			0	0	0	0	0		0	0	0		0	0	0		0		0	0	0		0	0	0		0	0		0		0	0	0	0	0		0	0	0	0	0	0
0	0	0	0			0	0	0	0	0		0	0	0		0	0	0		0		0	0	0		0	0	0		0	0		0		0	0	0	0	0		0	0	0	0	0	0
0	0	0	0			0	0	0	0	0		0	0	0		0	0	0		0		0	0	0		0	0	0		0	0		0		0	0	0	0	0		0	0	0	0	0	0
0	0	0	0			0	0	0	0	0		0	0	0		0	0	0		0		0	0	0		0	0			0	0		0		0	0	0	0	0		0	0	0	0	0	0
0	0	0	0			0	0	0	0	0		0	0	0		0	0	0		0		0	0	0		0	0			0	0		0		0	0	0	0	0		0	0	0	0	0	0
0	0	0	0			0	0	0	0	0		0	0	0		0	0	0		0		0	0	0		0	0			0	0		0		0	0	0	0	0		0	0	0	0	0	0
0	0	0	0			0	0	0	0	0		0	0	0		0	0	0		0		0	0	0		0	0			0	0		0		0	0	0	0	0		0	0	0	0	0	0
0	0	0	0			0	0	0	0	0		0	0	0		0	0	0		0		0	0	0		0	0			0	0		0		0	0	0	0	0		0	0	0	0	0	0
0	0	0	0			0	0	0	0	0		0	0	0		0	0	0		0		0	0	0		0	0			0	0		0		0	0	0	0	0		0	0	0	0	0	0
0	0	0	0			0	0	0	0	0		0	0	0		0	0	0		0		0	0	0		0	0			0	0		0		0	0	0	0	0		0	0	0	0	0	0
0	0	0	0			0	0	0	0	0		0	0	0		0	0	0		0		0	0	0		0	0			0	0		0		0	0	0	0	0		0	0	0	0	0	0
0	0	0	0			0	0	0	0	0		0	0	0		0	0	0		0		0	0	0		0	0			0	0		0		0	0	0	0	0		0	0	0	0	0	0
0	0	0	0			0	0	0	0	0		0	0	0		0	0	0		0		0	0	0		0	0			0	0		0		0	0	0	0	0		0	0	0	0	0	0
0	0	0	0			0	0	0	0	0		0	0	0		0	0	0		0		0	0	0		0	0			0	0		0		0	0	0	0	0		0	0	0	0	0	0
0	0	0	0			0	0	0	0	0		0	0	0		0	0	0		0		0	0	0		0	0			0	0		0		0	0	0	0	0		0	0	0	0	0	0
0	0	0	0			0	0	0	0	0		0	0	0		0	0	0		0		0	0	0		0	0			0	0		0		0	0	0	0	0		0	0	0	0	0	0
0	0	0	0			0	0	0	0	0		0	0	0		0	0	0		0		0	0	0		0	0			0	0		0		0	0	0	0	0		0	0	0	0	0	0
0	0	0	0			0	0	0	0	0		0	0	0		0	0	0		0		0	0	0		0	0			0	0		0		0	0	0	0	0		0	0	0	0	0	0
0	0	0	0			0	0	0	0	0		0	0	0		0	0	0		0		0	0	0		0	0			0	0		0		0	0	0	0	0		0	0	0	0	0	0
0	0	0	0			0	0	0	0	0		0	0	0		0	0	0		0		0	0	0		0	0			0	0		0		0	0	0		0		0	0	0	0	0	0
0	0	0	0			0	0	0	0	0		0	0	0		0	0	0		0		0	0	0		0	0			0	0		0		0	0	0		0		0	0	0	0	0	0
0	0	0	0			0	0	0		0		0	0	0		0	0	0		0			0	0		0	0			0	0		0		0	0	0		0		0	0	0	0	0	0
0	0	0	0			0	0	0		0		0	0	0		0	0	0		0			0	0		0	0			0	0		0		0	0	0		0		0	0	0	0	0	0
0	0	0	0			0	0	0		0		0	0	0		0	0	0		0			0	0		0	0			0	0		0		0	0	0		0		0	0	0	0	0	0
0	0	0	0			0	0	0		0		0	0	0		0	0	0		0			0	0		0	0			0	0		0		0	0	0		0		0	0	0	0	0	0
0	0	0	0			0	0	0		0		0	0	0		0	0	0		0			0	0		0	0			0	0		0		0	0	0		0		0	0	0	0	0	0
0	0	0	0			0	0	0		0		0	0	0		0	0	0		0			0	0		0	0			0	0		0		0	0	0		0		0	0	0	0	0	0
0	0	0	0			0	0	0		0		0	0	0		0	0	0		0			0	0		0	0			0	0		0		0	0	0		0		0	0	0	0	0	0
0	0	0	0			0	0	0		0		0	0	0		0	0	0		0			0	0		0	0			0	0		0		0	0	0		0		0	0	0	0	0	0
0	0	0	0			0	0	0		0		0	0	0		0	0	0		0			0	0		0	0			0	0		0		0	0	0		0		0	0	0	0	0	0
0	0	0	0			0	0	0		0		0	0	0		0	0	0		0			0	0		0	0			0	0		0		0	0	0		0		0	0	0	0	0	0
0	0	0	0			0	0	0		0		0	0	0		0	0	0		0			0	0		0	0			0	0		0		0	0	0		0		0	0	0	0	0	0
0	0	0	0			0	0	0		0		0	0	0		0	0	0		0			0	0		0	0			0	0		0		0	0	0		0		0	0	0	0	0	0
0	0	0	0			0	0	0		0		0	0	0		0	0	0		0			0	0		0	0			0	0		0		0	0	0		0		0	0	0	0	0	0
0	0	0	0			0	0	0		0		0	0	0		0	0	0		0			0	0		0	0			0	0		0		0	0	0		0		0	0	0	0	0	0
0	0	0	0			0	0	0		0		0	0	0		0	0	0		0			0	0		0	0			0	0		0		0	0	0		0		0	0	0	0	0	0
0	0	0	0			0	0	0		0		0	0	0		0	0	0		0			0	0		0	0			0	0		0		0	0	0		0		0	0	0	0	0	0
0	0	0	0			0	0	0		0		0	0	0		0	0	0		0			0	0		0	0			0	0		0		0	0	0		0		0	0	0	0	0	0
0	0	0	0			0	0	0		0		0	0	0		0	0	0		0			0	0		0	0			0	0		0		0	0	0		0		0	0	0	0	0	0
0	0	0	0			0	0	0		0		0	0	0		0	0	0		0			0	0		0	0			0	0		0		0	0	0		0		0	0	0	0	0	0
0	0	0	0			0	0	0		0		0	0	0		0	0	0		0			0	0		0	0			0	0		0		0	0	0		0		0	0	0	0	0	0
0	0	0	0			0	0	0		0		0	0	0		0	0	0		0			0	0		0	0			0	0		0		0	0	0		0		0	0	0	0	0	0
0	0	0	0			0	0	0		0		0	0	0		0	0	0		0			0	0		0	0			0	0		0		0	0	0		0		0	0	0	0	0	0
0	0	0	0			0	0	0		0		0	0	0		0	0	0		0			0	0		0	0			0	0		0		0	0	0		0		0	0	0	0	0	0
0	0	0	0			0	0	0		0		0	0	0		0	0	0		0			0	0		0	0			0	0		0		0	0	0		0		0	0	0	0	0	0
0	0	0	0			0	0	0		0		0	0	0		0	0	0		0			0	0		0	0			0	0		0		0	0	0		0		0	0	0	0	0	0
0	0	0	0			0	0	0		0		0	0	0		0	0	0		0			0	0		0	0			0	0		0		0	0	0		0		0	0	0	0	0	0
0	0	0	0			0	0	0		0		0	0	0		0	0	0		0			0	0		0	0			0	0		0		0	0	0		0		0	0	0	0	0	0
0	0	0	0			0	0	0		0		0	0	0		0	0	0		0			0	0		0	0			0	0		0		0	0	0		0		0	0	0	0	0	0
0	0	0	0			0	0	0		0		0	0	0		0	0	0		0			0	0		0	0			0	0		0		0	0	0		0		0	0	0	0	0	0
0	0	0	0			0	0	0		0		0	0	0		0	0	0		0			0	0		0	0			0	0		0		0	0	0		0		0	0	0	0	0	0
0	0	0	0			0	0	0		0		0	0	0		0	0	0		0			0	0		0	0			0	0		0		0	0	0		0		0	0	0	0	0	0
0	0	0	0			0	0	0		0		0	0	0		0	0	0		0			0	0		0	0			0	0		0		0	0	0		0		0	0	0	0	0	0
0	0	0	0			0	0	0		0		0	0	0		0	0	0		0			0	0		0	0			0	0		0		0	0	0		0		0	0	0	0	0	0
0	0	0	0			0	0	0		0		0	0	0		0	0	0		0			0	0		0	0			0	0		0		0	0	0		0		0	0	0	0	0	0
0	0	0	0			0	0	0		0		0	0	0		0	0	0		0			0	0		0	0			0	0		0		0	0	0		0		0	0	0	0	0	0
0	0	0	0			0	0	0		0		0	0	0		0	0	0		0			0	0		0	0			0	0		0		0	0	0		0		0	0	0	0	0	0
0	0	0	0			0	0	0		0		0	0	0		0	0	0		0			0			0	0			0	0		0		0	0	0		0		0	0	0	0	0	0
0	0	0	0			0	0	0		0		0	0	0		0	0	0		0			0			0	0			0	0		0		0	0	0		0		0	0	0	0	0	0
0	0	0	0			0	0	0		0		0	0	0		0	0	0		0			0			0	0			0	0		0		0	0	0		0		0	0	0	0	0	0
0	0	0	0			0	0	0		0		0	0	0		0	0	0		0			0			0	0			0	0		0		0	0	0		0		0	0	0	0	0	0
0	0	0	0			0	0	0		0		0	0	0		0	0	0		0			0			0	0			0	0		0		0	0	0		0		0	0	0	0	0	0
0	0	0	0			0	0	0		0		0	0	0		0	0	0		0			0			0	0			0	0		0		0	0	0		0		0	0	0	0	0	0
0	0	0	0			0	0	0		0		0	0	0		0	0	0		0			0			0	0			0	0		0		0	0	0		0		0	0	0	0	0	0
0	0	0	0			0	0	0		0		0	0	0		0	0	0		0			0			0	0			0	0		0		0	0	0		0		0	0	0	0	0	0
0	0	0	0			0	0	0		0		0	0	0		0	0	0		0			0			0	0			0	0		0		0	0	0		0		0	0	0	0	0	0
0	0	0	0			0	0	0		0		0	0	0		0	0	0		0			0			0	0			0	0		0		0	0	0		0		0	0	0	0	0	0
0	0	0	0			0		0		0		0	0			0	0	0		0			0			0	0			0	0		0		0	0	0		0		0	0	0	0	0	0
0	0	0	0			0		0		0		0	0			0	0	0		0			0			0	0			0	0		0		0	0	0		0		0	0	0	0	0	0
0	0	0	0			0		0		0		0	0			0	0	0		0			0			0	0			0	0		0		0	0	0		0		0	0	0	0	0	0
0	0	0	0			0		0		0		0	0			0	0	0		0			0			0	0			0	0		0		0	0	0		0		0	0	0	0	0	0
0	0	0	0			0		0		0			0			0	0	0		0						0	0			0	0		0		0		0		0		0	0	0	0	0	0
0	0	0	0			0		0		0			0			0	0	0		0						0	0			0	0		0		0		0		0		0	0	0	0	0	0
0	0	0	0			0		0		0			0			0	0	0		0							0			0	0		0		0		0		0		0	0	0	0	0	0
0	0	0	0			0		0		0			0			0	0	0		0							0			0	0		0		0		0		0		0	0	0	0	0	0
0	0	0	0			0		0		0			0			0	0	0		0							0			0	0		0		0		0		0		0	0	0	0	0	0
0	0	0	0			0		0		0			0			0	0	0		0							0			0	0		0		0		0		0		0	0	0	0	0	0
0	0	0	0			0		0		0			0			0	0	0		0							0			0	0		0		0		0		0		0	0	0	0	0	0
0	0	0	0			0		0		0			0			0	0	0		0							0			0	0		0		0		0		0		0	0	0	0	0	0
0	0	0	0			0		0		0			0			0	0	0		0							0			0	0		0		0		0		0		0	0	0	0	0	0
0	0	0	0			0		0		0			0			0	0	0		0							0			0	0		0		0		0		0		0	0	0	0	0	0
0	0	0	0			0		0		0			0			0	0	0		0							0			0	0		0		0		0		0		0	0	0	0	0	0
0	0	0	0			0		0		0			0			0	0	0		0							0			0	0		0		0		0		0		0	0	0	0	0	0
0	0	0	0			0		0		0			0			0	0	0		0							0			0	0		0		0		0		0		0	0	0	0	0	0
0	0	0	0			0		0		0			0			0	0	0		0							0			0	0		0		0		0		0		0	0	0	0	0	0
0	0	0	0			0		0		0			0			0		0		0							0			0	0		0				0		0		0	0	0	0	0	0
0	0	0	0			0		0		0			0			0		0		0							0			0	0		0				0		0		0	0	0	0	0	0
0	0	0	0			0		0		0			0			0		0		0							0			0	0		0				0		0		0	0	0	0	0	0
0	0	0	0			0		0		0			0			0		0		0							0			0	0		0				0		0		0	0	0	0	0	0
0	0	0	0			0		0		0			0			0		0		0							0			0	0		0				0		0		0	0	0	0		0
0	0	0	0			0		0		0			0			0		0		0							0			0	0		0				0		0		0	0	0	0		0
0	0	0	0			0		0		0			0			0		0		0							0			0	0		0				0		0		0	0	0	0		0
0	0	0	0			0				0			0					0		0							0						0				0		0		0	0	0	0
0	0	0	0			0				0			0
0	0	0	0			0				0			0
0	0	0	0			0				0			0
0	0	0	0			0				0			0
0	0	0	0			0				0			0
0	0	0	0			0				0			0
0	0	0	0			0				0			0
0	0	0	0			0				0			0
0	0	0	0			0							0
0	0	0	0			0							0
0	0	0	0			0							0
0	0	0	0			0							0
0	0	0	0			0							0
0	0	0	0			0							0
0	0	0	0			0							0
0	0	0	0			0							0
0	0	0	0			0							0
0	0	0	0			0							0
0	0	0	0			0							0
0	0	0	0			0							0
0	0	0	0			0							0
0	0	0	0			0							0
0	0	0	0			0							0
0	0	0	0			0							0
0	0	0	0			0							0
0	0	0	0			0							0
0	0	0	0			0							0
0	0	0	0			0							0
0	0	0	0			0							0
0	0	0	0			0							0
0	0	0	0			0							0
0	0	0	0			0							0
0	0	0	0			0							0
0	0	0	0			0							0
0	0	0	0			0							0
0	0	0	0			0							0
0	0	0	0			0							0
0	0	0	0			0							0
0	0	0	0			0							0
0	0	0	0			0							0
0	0	0	0			0							0
0	0	0	0			0							0
0	0	0	0			0							0
0	0	0	0			0							0
0	0	0	0			0							0
0	0	0	0			0							0
0	0	0	0			0							0
0	0	0	0			0							0
0	0	0	0			0							0
0	0	0	0			0							0
0	0	0	0			0							0
0	0	0	0			0							0
0	0	0	0			0							0
0	0	0	0			0							0
0	0	0	0			0							0
0	0	0	0			0							0
0	0	0	0			0							0
0	0	0	0			0							0
0	0	0	0			0							0
0	0	0	0			0							0
0	0	0	0			0							0
0	0	0	0			0							0
0	0	0	0			0							0
0	0	0	0			0							0
0	0	0	0			0							0
0	0	0	0			0							0
0	0	0	0			0							0
0	0	0	0			0							0
0	0	0	0			0							0
0	0	0	0			0							0
0	0	0	0			0							0
0	0	0	0			0							0
0	0	0	0			0							0
0	0	0	0			0							0
0	0	0	0			0							0
0	0	0	0			0							0
0	0	0	0			0							0
0	0	0	0			0							0
0	0	0	0			0							0
[truncated: 703 more rows]
[truncated: 48 more columns]
